# Supplementary material for: Microbial communities of aquatic environments on Heard Island characterized by pyrotag sequencing and environmental data
Source: PubMed Central journal article supplement (PMC5349573; doi:10.1038/srep44480), 2017-03-14
Supplement: srep44480-s1.pdf [file srep44480-s1.pdf]

**Microbial communities of aquatic environments on Heard Island characterized by pyrotag sequencing and environmental data**

**Michelle A. Allen and Ricardo Cavicchioli.**

**Supplementary Information**

**Supplementary Results**

**Figures S1 – S3**

**Tables S1 – S6 (note Table S4-S6 provided separately as excel files)**

### **Supplementary Results**

**Clustering at the phylum level.** To assess similarities and differences between the samples at phylum-level resolution, taxonomic data and sample profiles were analyzed by HCA and a heat map was constructed (Fig. S3). The Seal Pool and Atlas Pool 0.1  $\mu\text{m}$  filters clustered together, as did the Atlas Cove and Brown Lagoon 0.1  $\mu\text{m}$  filters, while the 0.8  $\mu\text{m}$  and 3  $\mu\text{m}$  filters from several locations clustered together (Seal Pool, Atlas Pool, Atlas Cove). The two-way crossed ANOSIM was unable to reject the null hypothesis of no difference between groups by location ( $R= 0.083$ ,  $p=0.313$ ) but the null hypothesis of no difference between groups by filter size was rejected at this level of taxonomic resolution ( $R= 0.8$ ,  $p=0.009$ ). Global SIMPROF (similarity profile) analysis, which tests for evidence of structure in an *a priori* unstructured set of samples, also strongly rejected the null hypothesis of no multivariate structure among the 15 samples ( $Pi = 3.957$ ,  $p=0.001$ ).

**Figure S1. Diversity metrics for the Heard Island samples.** Alpha diversity measured as a) Observed species, b) Shannon index, c) Faith's Phylogenetic Diversity, and d) Chao1 estimate.

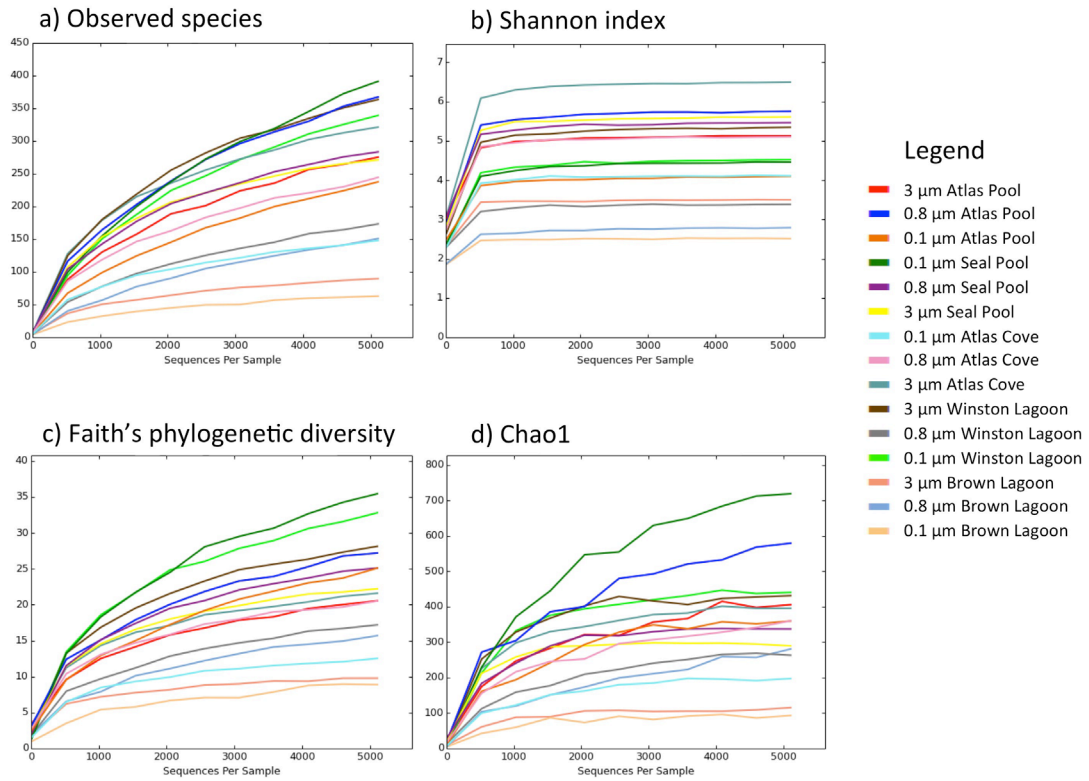

**Figure S2. Phylogenetic tree of 16S rRNA genes belonging to the *Euryarchaeota* Marine Group II.** Representative sequences of Heard Island archaeal OTUs (denoted ‘denovo’) were aligned with reference species from the *Thermoplasmatales* and Marine Group II using Clustal in MEGA6. A maximum-likelihood tree was inferred and the tree with the highest log likelihood is shown. *Halorubrum lacusprofundi* was used to root the tree and bootstrap values greater than 50 % are shown at the respective nodes.

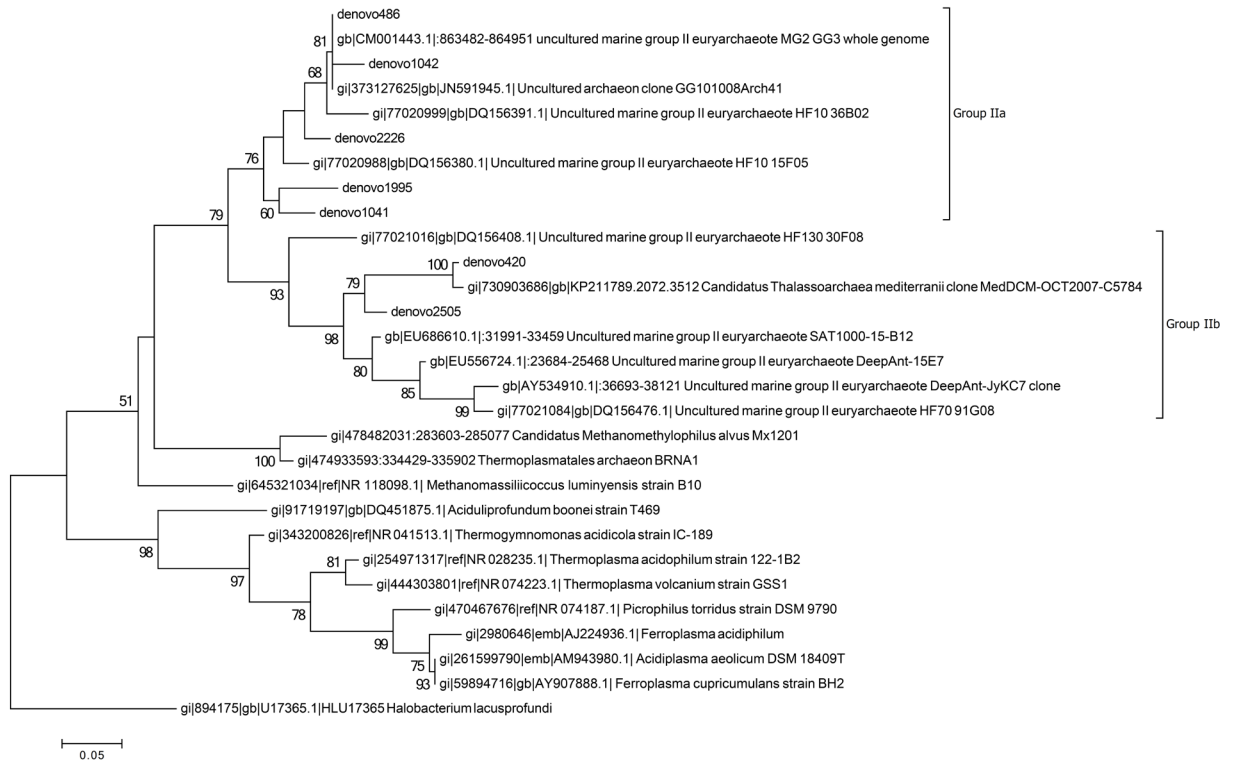

**Figure S3. Comparisons of Heard Island samples when SSU rRNA gene sequences were classified to the level of phylum. Sequences that could not be assigned with > 85 % bootstrap confidence were designated “unassigned”. SSU rRNA gene counts were normalized and square root transformed. a) Heatmap and biclustering plot with samples labeled according to filter size (0.1, 0.8 and 3.0  $\mu\text{m}$ ) and location. Heatmap colour scale is from blue (least abundant) to yellow to red (most abundant). b) Two-dimensional nMDS plot showing localization of Seal Pool (blue triangle), Atlas Pool (green triangle), Brown Lagoon (pink circle), Winston Lagoon (red diamond) and Atlas Cove (aqua square) samples. Clusters with similarity greater than 40 % (green line), 60 % (blue dashed line) and 80 % (aqua line) are marked.**

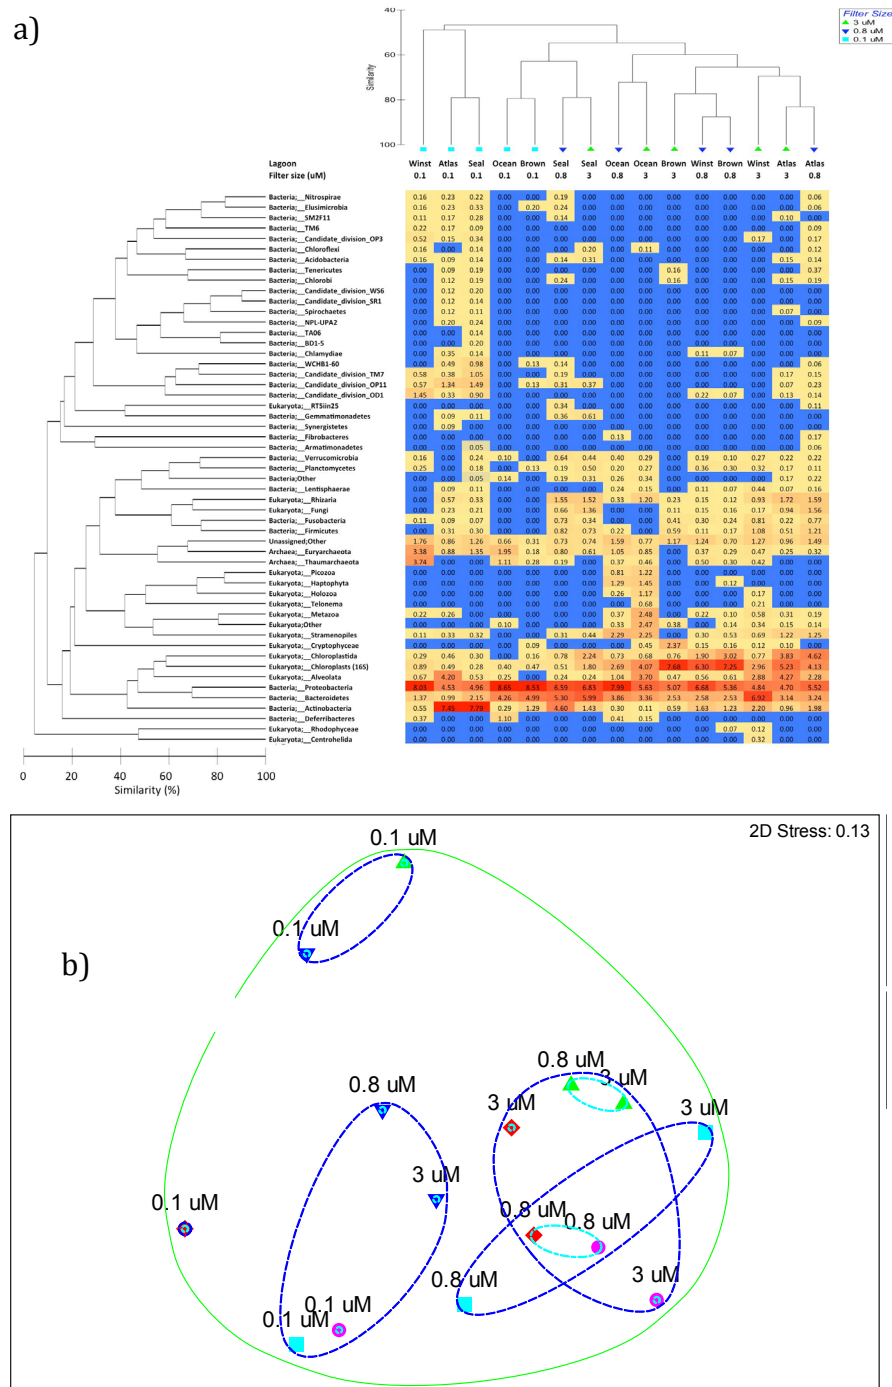

**Table S1. OTUs present in all locations.**

| <b>OTU ID</b> | <b>Total seq</b> | <b>Seal Pool</b> | <b>Atlas Pool</b> | <b>Brown Lagoon</b> | <b>Winston Lagoon</b> | <b>Atlas Cove</b> | <b>Taxon</b>               |
|---------------|------------------|------------------|-------------------|---------------------|-----------------------|-------------------|----------------------------|
| denovo1428    | 5360             | 181              | 341               | 4125                | 712                   | 1                 | <i>Betaproteobacteria</i>  |
| denovo2631    | 2888             | 3                | 2752              | 1                   | 30                    | 102               | Chloroplast                |
| denovo1904    | 1905             | 75               | 216               | 1368                | 181                   | 65                | <i>Betaproteobacteria</i>  |
| denovo1322    | 692              | 4                | 2                 | 487                 | 197                   | 2                 | <i>Actinobacteria</i>      |
| denovo179     | 95               | 17               | 2                 | 29                  | 44                    | 3                 | <i>Gammaproteobacteria</i> |
| denovo1094    | 46               | 16               | 17                | 11                  | 1                     | 1                 | <i>Actinobacteria</i>      |

**Table S2. Difference in community composition as detected by pairwise comparisons using ANOSIM and SIMPER.** ANOSIM generates a test statistic R indicative of the difference between groups where a value of 0 indicates the null hypothesis (no difference between groups) and 1 indicates all similarities within groups are less than any similarity between groups. R values > 0.50 indicate well separated samples, R > 0.30 are considered overlapping and R > 0.2 as barely separable at all, with p-values considered significant if  $p = < 0.01$ .

| Pairwise tests               | ANOSIM<br>R Statistic | SIMPER<br>av. dissimilarity (%) |
|------------------------------|-----------------------|---------------------------------|
| Atlas Pool, Seal Pool        | 0.111                 | 60                              |
| Atlas Pool, Atlas Cove       | 1                     | 92                              |
| Atlas Pool, Winston Lagoon   | 0.963                 | 85                              |
| Atlas Pool, Brown Lagoon     | 1                     | 82                              |
| Seal Pool, Atlas Cove        | 1                     | 92                              |
| Seal Pool, Winston Lagoon    | 1                     | 85                              |
| Seal Pool, Brown Lagoon      | 1                     | 83                              |
| Atlas Cove, Winston Lagoon   | 0.519                 | 69                              |
| Atlas Cove, Brown Lagoon     | 1                     | 84                              |
| Winston Lagoon, Brown Lagoon | 0.222                 | 66                              |

### Table S3. SIMPER one-way analysis data sets.

SIMPER

Similarity Percentages - species contributions

One-Way Analysis

*Data worksheet*

Name: Square Root Transform

Data type: Abundance

Sample selection: All

Variable selection: All

*Parameters*

Resemblance: S17 Bray Curtis similarity

Cut off for low contributions: 80.00%

Group Atlas Pool

Average similarity: 46.56

| Species                                                                                           | Av.Abund | Av.Sim | Sim/SD | Contrib% | Cum.% |
|---------------------------------------------------------------------------------------------------|----------|--------|--------|----------|-------|
| Eukaryota;__Alveolata;__Ciliophora;__Spirotrichea;__Hypotrichia;Other                             | 3.49     | 4.5    | 1.94   | 9.66     | 9.66  |
| Bacteria;__Cyanobacteria;__Chloroplast;__Chloroplast;__Chloroplast;__Chloroplast                  | 3.27     | 2.42   | 0.85   | 5.2      | 14.86 |
| Bacteria;__Proteobacteria;__Betaproteobacteria;__Burkholderiales;__Comamonadaceae;Other           | 2.66     | 2.31   | 1.18   | 4.96     | 19.83 |
| Bacteria;__Bacteroidetes;__Flavobacteria;__Flavobacteriales;__Flavobacteriaceae;__Flavobacterium  | 2.2      | 2.31   | 1.68   | 4.96     | 24.78 |
| Eukaryota;__Chloroplastida;__Chlorophyceae;__Chlamydomonas;__;__                                  | 2.25     | 1.83   | 0.9    | 3.92     | 28.7  |
| Unassigned;Other;Other;Other;Other;Other                                                          | 1.1      | 1.38   | 13.38  | 2.95     | 31.66 |
| Bacteria;__Actinobacteria;__Actinobacteria;__Micrococcales;__Microbacteriaceae;Other              | 1.99     | 1.35   | 1.94   | 2.89     | 34.55 |
| Eukaryota;__Chloroplastida;__Chlorophyceae;Other;Other;Other                                      | 1.85     | 1.25   | 0.78   | 2.68     | 37.23 |
| Bacteria;__Proteobacteria;__Betaproteobacteria;__Burkholderiales;__Alcaligenaceae;__Achromobacter | 1.09     | 1.2    | 1.62   | 2.57     | 39.8  |
| Bacteria;__Proteobacteria;__Betaproteobacteria;__Burkholderiales;__Comamonadaceae;__Polaromonas   | 1.23     | 1.15   | 1.34   | 2.46     | 42.27 |
| Bacteria;__Actinobacteria;__Actinobacteria;__Frankiales;__Sporichthyaceae;__hgcI_clade            | 2.32     | 1.08   | 3.11   | 2.31     | 44.58 |



|                                                                                                        |      |      |       |      |       |
|--------------------------------------------------------------------------------------------------------|------|------|-------|------|-------|
| Bacteria;__Proteobacteria;__Betaproteobacteria;__Burkholderiales;__Burkholderiaceae;__Polynucleobacter | 1.75 | 1.05 | 2.39  | 2.27 | 46.84 |
| Eukaryota;__Rhizaria;__Cercozoa;__Endomyxa;__Novel Clade 10;__                                         | 1.09 | 1.03 | 1.8   | 2.21 | 49.06 |
| Bacteria;__Proteobacteria;__Alphaproteobacteria;__Rhodobacterales;__Rhodobacteraceae;Other             | 1.03 | 0.98 | 1.38  | 2.11 | 51.17 |
| Bacteria;__Proteobacteria;__Betaproteobacteria;__Burkholderiales;__Comamonadaceae;__Simplicispira      | 0.91 | 0.8  | 1.25  | 1.71 | 52.88 |
| Eukaryota;__Fungi;__Chytridiomycota;__;__;__                                                           | 0.86 | 0.66 | 1.35  | 1.42 | 54.3  |
| Bacteria;__Proteobacteria;__Betaproteobacteria;Other;Other;Other                                       | 0.64 | 0.64 | 2.63  | 1.38 | 55.68 |
| Bacteria;__Proteobacteria;__Betaproteobacteria;__Burkholderiales;__Alcaligenaceae;Other                | 0.57 | 0.59 | 1.54  | 1.26 | 56.94 |
| Eukaryota;__Rhizaria;__Cercozoa;__Endomyxa;__Phytomyxea;__Spongospora                                  | 0.59 | 0.58 | 13.24 | 1.25 | 58.2  |
| Bacteria;__Actinobacteria;__Actinobacteria;__PeM15;__f;__g                                             | 0.79 | 0.54 | 1.33  | 1.17 | 59.36 |
| Bacteria;__Proteobacteria;__Betaproteobacteria;__Burkholderiales;__Comamonadaceae;__Paucibacter        | 0.61 | 0.54 | 1.07  | 1.15 | 60.52 |
| Bacteria;__Actinobacteria;__Actinobacteria;__Frankiales;__Sporichthyaceae;Other                        | 1.02 | 0.5  | 3.96  | 1.08 | 61.59 |
| Bacteria;__Proteobacteria;__Deltaproteobacteria;__Myxococcales;__0319-6G20;__g                         | 0.41 | 0.48 | 4.95  | 1.04 | 62.63 |
| Bacteria;__Actinobacteria;__Actinobacteria;__Micrococcales;__Microbacteriaceae;__Candidatus_Aquiluna   | 0.53 | 0.45 | 2.56  | 0.96 | 63.59 |
| Bacteria;__Proteobacteria;__Betaproteobacteria;__Burkholderiales;__Comamonadaceae;__Albidiferax        | 0.3  | 0.44 | 10.77 | 0.94 | 64.53 |
| Eukaryota;__Chloroplastida;__Trebouxiophyceae;__;__;__                                                 | 0.4  | 0.39 | 1.21  | 0.83 | 65.36 |
| Eukaryota;__Stramenopiles;__Chrysophyceae;__Chromulinales;__Phaeoplaca;__                              | 0.26 | 0.38 | 8.06  | 0.82 | 66.18 |
| Eukaryota;__Stramenopiles;__Diatomea;__Bacillariophytina;__Mediophyceae;Other                          | 0.58 | 0.37 | 0.58  | 0.8  | 66.98 |
| Bacteria;__Proteobacteria;__Gammaproteobacteria;__Xanthomonadales;__Xanthomonadaceae;__Arenimonas      | 0.38 | 0.36 | 1.8   | 0.78 | 67.76 |
| Bacteria;__Proteobacteria;__Gammaproteobacteria;__Pseudomonadales;__Moraxellaceae;__Psychrobacter      | 0.5  | 0.35 | 0.98  | 0.75 | 68.51 |
| Eukaryota;__Stramenopiles;__T53A1;__;__;__                                                             | 0.37 | 0.34 | 1.41  | 0.73 | 69.24 |
| Bacteria;__Actinobacteria;__Actinobacteria;__Micrococcales;__Microbacteriaceae;__Candidatus_Limnoluna  | 0.45 | 0.32 | 2.89  | 0.69 | 69.94 |
| Eukaryota;__Metazoa;__Arthropoda;__Maxillopoda;__;__                                                   | 0.24 | 0.32 | 4.46  | 0.69 | 70.63 |
| Eukaryota;__Stramenopiles;__Bicosoecida;__Siluaniiidae;__Siluania;__                                   | 0.36 | 0.32 | 1.05  | 0.68 | 71.31 |
| Bacteria;__Proteobacteria;__Alphaproteobacteria;__Rickettsiales;__mitochondria;__g                     | 0.37 | 0.31 | 1.07  | 0.67 | 71.97 |
| Eukaryota;__Alveolata;__Ciliophora;__Conthreep;__Prostomatea;__Cryptocaryon                            | 0.26 | 0.31 | 2.96  | 0.66 | 72.63 |
| Bacteria;__Proteobacteria;__Betaproteobacteria;__Burkholderiales;__Oxalobacteraceae;__Undibacterium    | 0.36 | 0.28 | 1.18  | 0.6  | 73.23 |
| Bacteria;__Bacteroidetes;__Sphingobacteriia;__Sphingobacteriales;__NS11-12_marine_group;__g            | 0.41 | 0.26 | 1.26  | 0.57 | 73.8  |
| Bacteria;__Proteobacteria;__Betaproteobacteria;__Rhodocyclales;__Rhodocyclaceae;__Dechloromonas        | 0.23 | 0.26 | 10.26 | 0.55 | 74.35 |
| Bacteria;__Proteobacteria;__Gammaproteobacteria;__Pseudomonadales;__Moraxellaceae;__Perlucidibaca      | 0.27 | 0.26 | 1.3   | 0.55 | 74.9  |
| Bacteria;__Proteobacteria;__Betaproteobacteria;__Burkholderiales;__Comamonadaceae;__g                  | 0.45 | 0.25 | 0.58  | 0.54 | 75.45 |
| Bacteria;__Proteobacteria;__Deltaproteobacteria;__Syntrophobacteriales;__Syntrophaceae;__Smithella     | 0.17 | 0.24 | 7.38  | 0.52 | 75.97 |

|                                                                                                        |      |      |      |      |       |
|--------------------------------------------------------------------------------------------------------|------|------|------|------|-------|
| Bacteria;__Firmicutes;__Clostridia;__Clostridiales;__Ruminococcaceae;__g                               | 0.35 | 0.24 | 3.35 | 0.52 | 76.49 |
| Bacteria;__Candidate_division_TM7;__c;__o;__f;__g                                                      | 0.23 | 0.24 | 5.6  | 0.52 | 77.01 |
| Bacteria;__Proteobacteria;__Gammaproteobacteria;__Xanthomonadales;__Sinobacteraceae;__g                | 0.17 | 0.23 | 8.06 | 0.5  | 77.51 |
| Bacteria;__Proteobacteria;__Alphaproteobacteria;__Rhodobacterales;__Rhodobacteraceae;__Rhodobacter     | 0.33 | 0.23 | 0.58 | 0.48 | 77.99 |
| Bacteria;__Proteobacteria;__Deltaproteobacteria;__Bdellovibrionales;__Bacteriovoraceae;__Bacteriovorax | 0.24 | 0.22 | 2.21 | 0.48 | 78.47 |
| Bacteria;__Candidate_division_OD1;__c;__o;__f;__g                                                      | 0.2  | 0.2  | 8.72 | 0.44 | 78.91 |
| Bacteria;__Fusobacteria;__Fusobacteria;__Fusobacteriales;__Fusobacteriaceae;__Fusobacterium            | 0.36 | 0.2  | 2.06 | 0.43 | 79.33 |
| Archaea;__Euryarchaeota;__Methanomicrobia;__Methanomicrobiales;__Methanoregulaceae;__Methanoregula     | 0.19 | 0.2  | 1.4  | 0.42 | 79.76 |
| Eukaryota;__Alveolata;__Protalveolata;__Colpodellida;Other;Other                                       | 0.33 | 0.2  | 0.58 | 0.42 | 80.18 |

#### Group Seal Pool

Average similarity: 45.67

| Species                                                                                                 | Av.Abund | Av.Sim | Sim/SD | Contrib% | Cum.% |
|---------------------------------------------------------------------------------------------------------|----------|--------|--------|----------|-------|
| Bacteria;__Actinobacteria;__Actinobacteria;__PeM15;__f;__g                                              | 3.86     | 3.07   | 1.21   | 6.71     | 6.71  |
| Bacteria;__Proteobacteria;__Betaproteobacteria;__Burkholderiales;__Comamonadaceae;Other                 | 2.78     | 2.8    | 1.63   | 6.13     | 12.85 |
| Bacteria;__Bacteroidetes;__Flavobacteria;__Flavobacteriales;__Flavobacteriaceae;__Flavobacterium        | 3.15     | 2.72   | 1.29   | 5.96     | 18.81 |
| Bacteria;__Proteobacteria;__Betaproteobacteria;__Burkholderiales;__Comamonadaceae;__Polaromonas         | 2        | 1.82   | 2.2    | 3.98     | 22.79 |
| Bacteria;__Bacteroidetes;__Sphingobacteriia;__Sphingobacteriales;__Chitinophagaceae;__Sediminibacterium | 1.15     | 1.16   | 10.95  | 2.54     | 25.33 |
| Bacteria;__Proteobacteria;__Betaproteobacteria;__Burkholderiales;__Burkholderiaceae;__Polynucleobacter  | 2.03     | 1.15   | 1.52   | 2.51     | 27.84 |
| Bacteria;__Proteobacteria;__Alphaproteobacteria;__Rhodobacterales;__Rhodobacteraceae;Other              | 1.79     | 1.05   | 0.7    | 2.29     | 30.13 |
| Unassigned;Other;Other;Other;Other;Other                                                                | 0.91     | 1.04   | 22.06  | 2.27     | 32.4  |
| Bacteria;__Bacteroidetes;__Sphingobacteriia;__Sphingobacteriales;__Sphingobacteriaceae;__Pedobacter     | 1.06     | 0.97   | 1.25   | 2.13     | 34.53 |
| Bacteria;__Bacteroidetes;__Flavobacteria;__Flavobacteriales;__Cryomorphaeae;__Fluviicola                | 0.9      | 0.96   | 2.13   | 2.11     | 36.64 |
| Bacteria;__Proteobacteria;__Betaproteobacteria;__Burkholderiales;__Comamonadaceae;__Simplicispira       | 1.25     | 0.95   | 0.99   | 2.08     | 38.72 |
| Eukaryota;__Rhizaria;__Cercozoa;__Thecofilosea;Other;Other                                              | 1.1      | 0.93   | 0.98   | 2.04     | 40.77 |
| Archaea;__Euryarchaeota;__Methanomicrobia;__Methanomicrobiales;__Methanoregulaceae;__Methanoregula      | 0.61     | 0.83   | 22.02  | 1.82     | 42.59 |

|                                                                                                          |      |      |       |      |       |
|----------------------------------------------------------------------------------------------------------|------|------|-------|------|-------|
| Bacteria;__Actinobacteria;__Actinobacteria;__Micrococcales;__Microbacteriaceae;Other                     | 1.18 | 0.78 | 1.34  | 1.71 | 44.29 |
| Bacteria;__Proteobacteria;__Gammaproteobacteria;__Pseudomonadales;__Moraxellaceae;__Perluclidibaca       | 0.76 | 0.76 | 6.69  | 1.67 | 45.96 |
| Bacteria;__Bacteroidetes;__Sphingobacteriia;__Sphingobacteriales;__NS11-12_marine_group;__g              | 1.14 | 0.72 | 0.98  | 1.57 | 47.54 |
| Bacteria;__Proteobacteria;__Betaproteobacteria;__Burkholderiales;__Comamonadaceae;__g                    | 1.15 | 0.71 | 1.1   | 1.56 | 49.1  |
| Bacteria;__Proteobacteria;__Betaproteobacteria;Other;Other;Other                                         | 0.54 | 0.69 | 25.44 | 1.52 | 50.62 |
| Bacteria;__Proteobacteria;__Betaproteobacteria;__Burkholderiales;__Alcaligenaceae;__Achromobacter        | 0.67 | 0.69 | 1.96  | 1.5  | 52.12 |
| Bacteria;__Actinobacteria;Other;Other;Other;Other                                                        | 0.78 | 0.67 | 5.3   | 1.46 | 53.58 |
| Bacteria;__Proteobacteria;__Betaproteobacteria;__Burkholderiales;__Alcaligenaceae;Other                  | 0.64 | 0.64 | 4.36  | 1.41 | 54.99 |
| Bacteria;__Proteobacteria;__Deltaproteobacteria;__Bdellovibrionales;__Bacteriovoraceae;__Bacteriovorax   | 0.5  | 0.63 | 5.36  | 1.37 | 56.36 |
| Bacteria;__Proteobacteria;__Alphaproteobacteria;__Sphingomonadales;__Sphingomonadaceae;__Novosphingobium | 0.68 | 0.61 | 2.57  | 1.33 | 57.69 |
| Bacteria;__Bacteroidetes;__Sphingobacteriia;__Sphingobacteriales;__Chitinophagaceae;__Ferruginibacter    | 0.86 | 0.6  | 0.9   | 1.32 | 59    |
| Bacteria;__Actinobacteria;__Actinobacteria;__Frankiales;__Sporichthyaceae;__hgcl_clade                   | 1.22 | 0.58 | 1.11  | 1.28 | 60.28 |
| Bacteria;__Proteobacteria;__Betaproteobacteria;__Burkholderiales;__Comamonadaceae;__Albidiferax          | 0.77 | 0.57 | 0.71  | 1.25 | 61.54 |
| Bacteria;__Proteobacteria;__Betaproteobacteria;__Burkholderiales;Other;Other                             | 0.53 | 0.54 | 1.82  | 1.17 | 62.71 |
| Bacteria;__Proteobacteria;__Betaproteobacteria;__Burkholderiales;__Comamonadaceae;__Paucibacter          | 0.97 | 0.51 | 0.91  | 1.13 | 63.83 |
| Bacteria;__Actinobacteria;__Actinobacteria;__Micrococcales;__Microbacteriaceae;__Candidatus_Aquiluna     | 0.62 | 0.49 | 1.92  | 1.07 | 64.91 |
| Eukaryota;__Chloroplastida;__Chlorophyceae;__Desmodesmus;__;__                                           | 1.02 | 0.48 | 1.05  | 1.05 | 65.96 |
| Bacteria;__Candidate_division_OP11;__c;__o;__f;__g                                                       | 0.72 | 0.47 | 7.02  | 1.02 | 66.98 |
| Bacteria;__Cyanobacteria;__Chloroplast;__Chloroplast;__Chloroplast;__Chloroplast                         | 0.84 | 0.47 | 2.3   | 1.02 | 68    |
| Bacteria;__Actinobacteria;__Actinobacteria;__Frankiales;__Sporichthyaceae;Other                          | 1.02 | 0.47 | 1     | 1.02 | 69.02 |
| Bacteria;__Proteobacteria;__Gammaproteobacteria;__Pseudomonadales;__Moraxellaceae;__Psychrobacter        | 0.53 | 0.46 | 1.21  | 1.01 | 70.02 |
| Bacteria;__Proteobacteria;__Alphaproteobacteria;__Rhodospirillales;__Acetobacteraceae;__Roseococcus      | 0.71 | 0.46 | 0.69  | 1    | 71.02 |
| Bacteria;__Actinobacteria;__Acidimicrobiia;__Acidimicrobiales;__uncultured;__g                           | 0.41 | 0.43 | 7.03  | 0.94 | 71.96 |
| Bacteria;__Bacteroidetes;__Sphingobacteriia;__Sphingobacteriales;__Chitinophagaceae;__g                  | 0.71 | 0.4  | 1.09  | 0.87 | 72.83 |
| Bacteria;__Proteobacteria;__Gammaproteobacteria;__Oceanospirillales;__oc58;__g                           | 0.39 | 0.36 | 1.44  | 0.79 | 73.62 |
| Bacteria;__Bacteroidetes;__vadinHA17;__o;__f;__g                                                         | 0.34 | 0.33 | 4.27  | 0.72 | 74.34 |
| Eukaryota;__Fungi;__Chytridiomycota;__;__;__                                                             | 0.63 | 0.32 | 0.76  | 0.69 | 75.03 |
| Bacteria;__Proteobacteria;__Betaproteobacteria;__Burkholderiales;__Oxalobacteraceae;__Undibacterium      | 0.28 | 0.3  | 3.96  | 0.65 | 75.68 |
| Bacteria;__Proteobacteria;__Deltaproteobacteria;__Myxococcales;__0319-6G20;__g                           | 0.36 | 0.28 | 2     | 0.61 | 76.28 |
| Bacteria;__Proteobacteria;Other;Other;Other;Other                                                        | 0.24 | 0.27 | 40.49 | 0.59 | 76.88 |
| Bacteria;__Proteobacteria;__Betaproteobacteria;__Burkholderiales;__Comamonadaceae;__Rhizobacter          | 0.28 | 0.27 | 2.93  | 0.59 | 77.47 |

|                                                                                                      |      |      |      |      |       |
|------------------------------------------------------------------------------------------------------|------|------|------|------|-------|
| Bacteria;__Gemmatimonadetes;__Gemmatimonadetes;__Gemmatimonadales;__Gemmatimonadaceae;__Gemmatimonas | 0.35 | 0.27 | 1.35 | 0.58 | 78.05 |
| Eukaryota;__Fungi;__LKM11;__;__                                                                      | 0.26 | 0.26 | 2.6  | 0.57 | 78.62 |
| Bacteria;__Bacteroidetes;__Sphingobacteriia;__Sphingobacteriales;__Saprospiraceae;__g                | 0.76 | 0.26 | 0.99 | 0.57 | 79.19 |
| Eukaryota;__Stramenopiles;__Chrysophyceae;Other;Other;Other                                          | 0.22 | 0.25 | 2.99 | 0.54 | 79.72 |
| Bacteria;__Verrucomicrobia;__Opitutae;__Opitutales;__Opitutaceae;__Opitutus                          | 0.36 | 0.24 | 0.84 | 0.53 | 80.25 |

Group Atlas Cove

Average similarity: 53.06

| Species                                                                                                                   | Av.Abund | Av.Sim | Sim/SD | Contrib% | Cum.% |
|---------------------------------------------------------------------------------------------------------------------------|----------|--------|--------|----------|-------|
| Bacteria;__Proteobacteria;__Gammaproteobacteria;Other;Other;Other                                                         | 3.15     | 3.59   | 6.96   | 6.76     | 6.76  |
| Bacteria;__Proteobacteria;__Gammaproteobacteria;__Oceanospirillales;__ZD0405;__g                                          | 3.19     | 3.37   | 2.33   | 6.35     | 13.12 |
| Bacteria;__Bacteroidetes;__Flavobacteria;__Flavobacteriales;__Flavobacteriaceae;__NS2b_marine_group                       | 1.92     | 2.58   | 4.38   | 4.86     | 17.98 |
| Bacteria;__Proteobacteria;__Alphaproteobacteria;__SAR11_clade;__Surface_1;__g                                             | 2.82     | 2.35   | 4.38   | 4.43     | 22.4  |
| Bacteria;__Proteobacteria;__Gammaproteobacteria;__Oceanospirillales;__SAR86_clade;__g                                     | 1.99     | 2.3    | 2.34   | 4.34     | 26.74 |
| Bacteria;__Proteobacteria;__Gammaproteobacteria;__Alteromonadales;__Alteromonadaceae;__SAR92_clade                        | 2.09     | 2.25   | 7.47   | 4.24     | 30.97 |
| Bacteria;__Bacteroidetes;__Flavobacteria;__Flavobacteriales;__Flavobacteriaceae;__Polaribacter                            | 1.7      | 2.16   | 9.39   | 4.07     | 35.04 |
| Bacteria;__Bacteroidetes;__Flavobacteria;__Flavobacteriales;__NS9_marine_group;__g                                        | 1.54     | 2.11   | 14.82  | 3.98     | 39.02 |
| Bacteria;__Proteobacteria;__Alphaproteobacteria;__Rhodobacterales;__Rhodobacteraceae;__Roseobacter_clade_DC5-80-3_lineage | 1.59     | 1.92   | 2.09   | 3.62     | 42.64 |
| Bacteria;__Cyanobacteria;__Chloroplast;__Chloroplast;__Chloroplast;__Chloroplast                                          | 2.38     | 1.59   | 0.95   | 3        | 45.64 |
| Archaea;__Euryarchaeota;__Thermoplasmata;__Thermoplasmatales;__Marine_Group_II;__g                                        | 1.28     | 1.38   | 4.02   | 2.6      | 48.23 |
| Bacteria;__Bacteroidetes;__Flavobacteria;__Flavobacteriales;__Flavobacteriaceae;__NS4_marine_group                        | 1.31     | 1.34   | 1.74   | 2.53     | 50.76 |
| Unassigned;Other;Other;Other;Other;Other                                                                                  | 1.01     | 1.04   | 14.51  | 1.95     | 52.72 |
| Bacteria;__Bacteroidetes;__Flavobacteria;__Flavobacteriales;__Flavobacteriaceae;Other                                     | 1.01     | 0.99   | 6.13   | 1.87     | 54.59 |
| Bacteria;__Proteobacteria;__Alphaproteobacteria;__SAR11_clade;Other;Other                                                 | 0.9      | 0.87   | 4.48   | 1.64     | 56.23 |
| Bacteria;__Proteobacteria;__Alphaproteobacteria;__Rhodobacterales;__Rhodobacteraceae;__g                                  | 0.85     | 0.86   | 4.05   | 1.63     | 57.86 |
| Bacteria;__Proteobacteria;__Gammaproteobacteria;__Oceanospirillales;__Oceanospirillaceae;Other                            | 0.68     | 0.85   | 14.94  | 1.6      | 59.45 |
| Bacteria;__Proteobacteria;__Gammaproteobacteria;__Alteromonadales;__Pseudoalteromonadaceae;__Pseudoalteromonas            | 1.18     | 0.8    | 0.81   | 1.5      | 60.96 |
| Bacteria;__Bacteroidetes;__Flavobacteria;__Flavobacteriales;Other;Other                                                   | 0.84     | 0.74   | 3.1    | 1.4      | 62.36 |

|                                                                                                      |      |      |      |      |       |
|------------------------------------------------------------------------------------------------------|------|------|------|------|-------|
| Bacteria;__Proteobacteria;__Alphaproteobacteria;__Rickettsiales;__SAR116_clade;__g                   | 0.57 | 0.71 | 1.8  | 1.33 | 63.69 |
| Bacteria;__Proteobacteria;__Gammaproteobacteria;__Alteromonadales;__Alteromonadaceae;__Alteromonas   | 1.1  | 0.69 | 0.58 | 1.3  | 64.98 |
| Eukaryota;__Stramenopiles;__MAST-1;__MAST-1 B;__;__                                                  | 1    | 0.61 | 0.58 | 1.16 | 66.14 |
| Bacteria;__Proteobacteria;__Gammaproteobacteria;__Oceanospirillales;__Alcanivoracaceae;__Alcanivorax | 0.67 | 0.6  | 2.06 | 1.12 | 67.26 |
| Archaea;__Thaumarchaeota;__Marine_Group_I;__o;__f;__g                                                | 0.65 | 0.59 | 5.73 | 1.12 | 68.38 |
| Bacteria;__Proteobacteria;__Gammaproteobacteria;__Oceanospirillales;__OM182_clade;__g                | 0.55 | 0.54 | 8.73 | 1.02 | 69.4  |
| Bacteria;__Bacteroidetes;__Flavobacteria;__Flavobacteriales;__Flavobacteriaceae;__NS3a_marine_group  | 0.38 | 0.54 | 7.23 | 1.02 | 70.42 |
| Bacteria;__Bacteroidetes;__Flavobacteria;__Flavobacteriales;__Cryomorphaceae;__Owenweeksia           | 0.47 | 0.54 | 2.25 | 1.01 | 71.44 |
| Eukaryota;__Haptophyta;__Prymnesiophyceae;Other;Other;Other                                          | 0.86 | 0.53 | 0.58 | 1    | 72.44 |
| Bacteria;__Proteobacteria;__Betaproteobacteria;Other;Other;Other                                     | 0.45 | 0.53 | 4.15 | 0.99 | 73.43 |
| Bacteria;__Proteobacteria;__Gammaproteobacteria;__Alteromonadales;__Alteromonadaceae;Other           | 0.45 | 0.49 | 4.32 | 0.93 | 74.36 |
| Bacteria;__Proteobacteria;__Alphaproteobacteria;__SAR11_clade;__Surface_4;__g                        | 0.49 | 0.47 | 5.28 | 0.89 | 75.25 |
| Bacteria;__Bacteroidetes;__Flavobacteria;__Flavobacteriales;__Flavobacteriaceae;__NS5_marine_group   | 0.6  | 0.46 | 2.84 | 0.88 | 76.13 |
| Bacteria;__Proteobacteria;__Alphaproteobacteria;__Rhodobacterales;__Rhodobacteraceae;__Sulfitobacter | 0.73 | 0.46 | 0.58 | 0.87 | 77    |
| Bacteria;__Bacteroidetes;__Flavobacteria;__Flavobacteriales;__Flavobacteriaceae;__g                  | 0.39 | 0.45 | 9.7  | 0.85 | 77.84 |
| Bacteria;__Proteobacteria;__Alphaproteobacteria;Other;Other;Other                                    | 0.42 | 0.41 | 3.03 | 0.77 | 78.61 |
| Bacteria;__Proteobacteria;__Gammaproteobacteria;__Alteromonadales;__Colwelliaceae;__Colwellia        | 0.61 | 0.38 | 1.46 | 0.71 | 79.33 |
| Eukaryota;__Stramenopiles;__MAST-3;__;__;__                                                          | 0.61 | 0.37 | 0.58 | 0.7  | 80.03 |

#### Group Winston Lagoon

Average similarity: 31.66

| Species                                                                                        | Av.Abund | Av.Sim | Sim/SD | Contrib% | Cum.% |
|------------------------------------------------------------------------------------------------|----------|--------|--------|----------|-------|
| Bacteria;__Cyanobacteria;__Chloroplast;__Chloroplast;__Chloroplast;__Chloroplast               | 3.37     | 2.45   | 1.36   | 7.75     | 7.75  |
| Unassigned;Other;Other;Other;Other;Other                                                       | 1.43     | 2.02   | 9.2    | 6.38     | 14.14 |
| Bacteria;__Proteobacteria;__Alphaproteobacteria;__Rhodobacterales;__Rhodobacteraceae;Other     | 1.87     | 1.62   | 0.85   | 5.11     | 19.24 |
| Bacteria;__Bacteroidetes;__Flavobacteria;__Flavobacteriales;__Flavobacteriaceae;Other          | 2.34     | 0.96   | 5.25   | 3.04     | 22.29 |
| Bacteria;__Proteobacteria;__Gammaproteobacteria;__Alteromonadales;__Pseudoalteromonadaceae;__g | 1.15     | 0.89   | 1.17   | 2.8      | 25.09 |
| Bacteria;__Proteobacteria;__Gammaproteobacteria;__Alteromonadales;__Colwelliaceae;__Colwellia  | 0.95     | 0.77   | 1.38   | 2.43     | 27.51 |
| Bacteria;__Proteobacteria;__Gammaproteobacteria;__Oceanospirillales;__SAR86_clade;__g          | 1.39     | 0.75   | 1.86   | 2.36     | 29.87 |

|                                                                                                                               |      |      |      |      |       |
|-------------------------------------------------------------------------------------------------------------------------------|------|------|------|------|-------|
| Bacteria;__Proteobacteria;__Alphaproteobacteria;__Rhodobacterales;__Rhodobacteraceae;__Roseobacter_clade_DC5-80-3_lineage     | 0.55 | 0.73 | 2.31 | 2.3  | 32.17 |
| Archaea;__Thaumarchaeota;__Marine_Group_I;__o;__f;__g                                                                         | 1.55 | 0.73 | 4.32 | 2.3  | 34.47 |
| Bacteria;__Proteobacteria;__Gammaproteobacteria;__Oceanospirillales;__ZD0405;__g                                              | 1.34 | 0.71 | 1.77 | 2.25 | 36.72 |
| Bacteria;__Bacteroidetes;__Flavobacteria;__Flavobacteriales;__Flavobacteriaceae;__NS2b_marine_group                           | 0.42 | 0.66 | 9.36 | 2.09 | 38.81 |
| Bacteria;__Proteobacteria;__Alphaproteobacteria;__Rhodobacterales;__Rhodobacteraceae;__g                                      | 0.89 | 0.57 | 1.05 | 1.81 | 40.62 |
| Bacteria;__Bacteroidetes;__Flavobacteria;__Flavobacteriales;__Flavobacteriaceae;__Polaribacter                                | 0.91 | 0.52 | 1.48 | 1.64 | 42.25 |
| Bacteria;__Proteobacteria;__Deltaproteobacteria;__Bdellovibrionales;__Bacteriovoraceae;__Peredibacter                         | 0.59 | 0.51 | 1.94 | 1.62 | 43.88 |
| Bacteria;__Proteobacteria;__Gammaproteobacteria;Other;Other;Other                                                             | 0.38 | 0.48 | 1.68 | 1.52 | 45.39 |
| Bacteria;__Bacteroidetes;__Flavobacteria;__Flavobacteriales;__Flavobacteriaceae;__NS4_marine_group                            | 0.36 | 0.47 | 2.57 | 1.48 | 46.87 |
| Archaea;__Euryarchaeota;__Thermoplasmata;__Thermoplasmatales;__Marine_Group_II;__g                                            | 0.37 | 0.46 | 9.68 | 1.47 | 48.34 |
| Bacteria;__Proteobacteria;__Alphaproteobacteria;__SAR11_clade;__Surface_1;__g                                                 | 2.12 | 0.46 | 1.8  | 1.46 | 49.81 |
| Bacteria;__Proteobacteria;__Gammaproteobacteria;__Alteromonadales;__Alteromonadaceae;__SAR92_clade                            | 0.35 | 0.46 | 2.85 | 1.44 | 51.25 |
| Bacteria;__Proteobacteria;__Betaproteobacteria;Other;Other;Other                                                              | 0.68 | 0.44 | 0.99 | 1.37 | 52.62 |
| Bacteria;__Actinobacteria;__Actinobacteria;__Corynebacteriales;__Nocardiaceae;__Rhodococcus                                   | 0.96 | 0.43 | 1.01 | 1.35 | 53.97 |
| Bacteria;__Proteobacteria;__Alphaproteobacteria;__Sphingomonadales;__Sphingomonadaceae;__Sphingopyxis                         | 1.75 | 0.42 | 1.47 | 1.34 | 55.32 |
| Bacteria;__Proteobacteria;__Gammaproteobacteria;__Oceanospirillales;__Oceanospirillaceae;Other                                | 0.36 | 0.42 | 3.99 | 1.32 | 56.64 |
| Eukaryota;__Chloroplastida;__Mamiellophyceae;__Micromonas;__;__                                                               | 0.8  | 0.41 | 5.31 | 1.29 | 57.93 |
| Archaea;__Euryarchaeota;__Halobacteria;__Halobacteriales;__Deep_Sea_Hydrothermal_Vent_Gp_6(DHVEG-6);__Candidatus_Parvarchaeum | 1.11 | 0.4  | 11.4 | 1.27 | 59.2  |
| Bacteria;__Bacteroidetes;__Flavobacteria;__Flavobacteriales;__Cryomorphaceae;__Owenweeksia                                    | 0.39 | 0.4  | 1.58 | 1.27 | 60.47 |
| Bacteria;__Bacteroidetes;__Flavobacteria;__Flavobacteriales;__Flavobacteriaceae;__NS3a_marine_group                           | 0.9  | 0.4  | 6.15 | 1.25 | 61.72 |
| Bacteria;__Proteobacteria;__Gammaproteobacteria;__Pseudomonadales;__Pseudomonadaceae;__Pseudomonas                            | 0.3  | 0.36 | 11.4 | 1.14 | 62.85 |
| Bacteria;__Proteobacteria;__Gammaproteobacteria;__Alteromonadales;__Shewanellaceae;__Shewanella                               | 0.28 | 0.35 | 2.25 | 1.09 | 63.95 |
| Bacteria;__Proteobacteria;__Gammaproteobacteria;__Enterobacteriales;__Enterobacteriaceae;Other                                | 0.37 | 0.33 | 2.57 | 1.05 | 65    |
| Bacteria;__Bacteroidetes;__Flavobacteria;__Flavobacteriales;__NS9_marine_group;__g                                            | 0.4  | 0.32 | 3    | 1    | 66    |
| Bacteria;__Bacteroidetes;__Cytophagia;__Cytophagales;__Flammeovirgaceae;__Reichenbachiella                                    | 0.29 | 0.3  | 9.42 | 0.96 | 66.96 |
| Bacteria;__Proteobacteria;__Gammaproteobacteria;__Alteromonadales;__Alteromonadaceae;Other                                    | 0.25 | 0.3  | 9.42 | 0.96 | 67.92 |
| Eukaryota;__Alveolata;__Ciliophora;__Spirotrichea;__Oligotrichia;__uncultured                                                 | 0.26 | 0.3  | 9.42 | 0.96 | 68.87 |
| Bacteria;__Fusobacteria;__Fusobacteria;__Fusobacteriales;__Fusobacteriaceae;__Fusobacterium                                   | 0.36 | 0.28 | 1.68 | 0.88 | 69.75 |
| Eukaryota;__Alveolata;__Ciliophora;__Spirotrichea;__Hypotrichia;Other                                                         | 0.3  | 0.27 | 1.68 | 0.87 | 70.62 |
| Eukaryota;__Alveolata;__Ciliophora;__Spirotrichea;__Oligotrichia;__Strombidium                                                | 0.27 | 0.27 | 1.68 | 0.87 | 71.49 |

|                                                                                                    |      |      |      |      |       |
|----------------------------------------------------------------------------------------------------|------|------|------|------|-------|
| Bacteria;__Proteobacteria;__Alphaproteobacteria;__Rhodobacterales;__Rhodobacteraceae;__Loktanella  | 0.36 | 0.27 | 0.58 | 0.85 | 72.34 |
| Eukaryota;__Alveolata;__Ciliophora;__Conthreep;__Phyllopharyngea;__AT1-2                           | 0.75 | 0.26 | 9.66 | 0.84 | 73.17 |
| Bacteria;__Bacteroidetes;__Flavobacteria;__Flavobacteriales;__Flavobacteriaceae;__NS5_marine_group | 0.32 | 0.25 | 2.07 | 0.8  | 73.97 |
| Bacteria;__Proteobacteria;__Gammaproteobacteria;__Alteromonadales;Other;Other                      | 0.24 | 0.25 | 2.23 | 0.78 | 74.75 |
| Bacteria;__Bacteroidetes;__Flavobacteria;__Flavobacteriales;__Cryomorphaceae;__Fluviicola          | 0.31 | 0.23 | 2.67 | 0.73 | 75.48 |
| Bacteria;__Bacteroidetes;__Sphingobacteriia;__Sphingobacteriales;__Saprospiraceae;__Lewinella      | 0.48 | 0.23 | 2.67 | 0.73 | 76.21 |
| Bacteria;__Proteobacteria;__Alphaproteobacteria;__Kordiimonadales;__Kordiimonadaceae;__Kordiimonas | 0.28 | 0.23 | 2.67 | 0.73 | 76.95 |
| Eukaryota;__Alveolata;__Ciliophora;__Spirotrichea;__Hypotrichia;__                                 | 0.31 | 0.23 | 2.67 | 0.72 | 77.67 |
| Eukaryota;__Metazoa;__Arthropoda;__Maxillopoda;__;                                                 | 0.25 | 0.23 | 2.67 | 0.72 | 78.4  |
| Bacteria;__Planctomycetes;__BD7-11;__o;__f;__g                                                     | 0.21 | 0.23 | 2.79 | 0.72 | 79.12 |
| Eukaryota;__Alveolata;__Ciliophora;__Spirotrichea;__Euplotia;__Aspidisca                           | 0.26 | 0.21 | 3.51 | 0.68 | 79.8  |
| Bacteria;__Verrucomicrobia;__Opitutae;__Puniceicoccales;__Puniceicoccaceae;__Lentimonas            | 0.15 | 0.2  | 5.95 | 0.62 | 80.42 |

#### Group Brown Lagoon

Average similarity: 44.47

| Species                                                                                                      | Av.Abund | Av.Sim | Sim/SD | Contrib% | Cum.% |
|--------------------------------------------------------------------------------------------------------------|----------|--------|--------|----------|-------|
| Bacteria;__Proteobacteria;__Alphaproteobacteria;__Sphingomonadales;__Sphingomonadaceae;__Sphingopyxis        | 4.06     | 7.05   | 4.12   | 15.85    | 15.85 |
| Bacteria;__Cyanobacteria;__Chloroplast;__Chloroplast;__Chloroplast;__Chloroplast                             | 5.14     | 6.63   | 0.71   | 14.91    | 30.76 |
| Bacteria;__Proteobacteria;__Betaproteobacteria;__Burkholderiales;__Comamonadaceae;Other                      | 3.08     | 5.98   | 3.82   | 13.45    | 44.21 |
| Bacteria;__Bacteroidetes;__Flavobacteria;__Flavobacteriales;__Flavobacteriaceae;__NS3a_marine_group          | 3.07     | 5.48   | 11.81  | 12.31    | 56.53 |
| Bacteria;__Proteobacteria;__Alphaproteobacteria;__Rhodobacterales;__Rhodobacteraceae;Other                   | 2.06     | 2.39   | 1.54   | 5.37     | 61.9  |
| Bacteria;__Actinobacteria;__Acidimicrobiia;__Acidimicrobiales;__Acidimicrobiaceae;__g                        | 0.99     | 1.98   | 2.46   | 4.45     | 66.35 |
| Bacteria;__Bacteroidetes;__Flavobacteria;__Flavobacteriales;__Flavobacteriaceae;__Polaribacter               | 0.68     | 1.51   | 10.31  | 3.39     | 69.74 |
| Bacteria;__Proteobacteria;__Alphaproteobacteria;__Rhodobacterales;__Rhodobacteraceae;__Loktanella            | 0.49     | 1.18   | 4.82   | 2.65     | 72.38 |
| Unassigned;Other;Other;Other;Other;Other                                                                     | 0.73     | 1.11   | 2.27   | 2.49     | 74.88 |
| Bacteria;__Proteobacteria;__Alphaproteobacteria;__Sphingomonadales;__Erythrobacteraceae;__Altererythrobacter | 0.78     | 1.08   | 7.11   | 2.43     | 77.3  |
| Bacteria;__Proteobacteria;__Betaproteobacteria;Other;Other;Other                                             | 1.33     | 0.84   | 4.36   | 1.88     | 79.18 |
| Eukaryota;__Chloroplastida;__Mamiellophyceae;__Micromonas;__;                                                | 1.27     | 0.79   | 1.21   | 1.78     | 80.96 |

Groups Atlas Pool & Seal Pool

Average dissimilarity = 60.35

| Species                                                                                                 | Atlas Pool | Seal Pool | Av.Diss | Diss/SD | Contrib% | Cum.% |
|---------------------------------------------------------------------------------------------------------|------------|-----------|---------|---------|----------|-------|
|                                                                                                         | Av.Abund   | Av.Abund  |         |         |          |       |
| Eukaryota;__Alveolata;__Ciliophora;__Spirotrichea;__Hypotrichia;Other                                   | 3.49       | 0.14      | 2.55    | 2.8     | 4.22     | 4.22  |
| Bacteria;__Actinobacteria;__Actinobacteria;__PeM15;__f;__g                                              | 0.79       | 3.86      | 2.36    | 1.41    | 3.91     | 8.13  |
| Bacteria;__Cyanobacteria;__Chloroplast;__Chloroplast;__Chloroplast;__Chloroplast                        | 3.27       | 0.84      | 1.96    | 1.46    | 3.25     | 11.38 |
| Bacteria;__Actinobacteria;__Actinobacteria;__Frankiales;__Sporichthyaceae;__hgcI_clade                  | 2.32       | 1.22      | 1.58    | 1       | 2.61     | 13.99 |
| Eukaryota;__Chloroplastida;__Chlorophyceae;__Chlamydomonas;__;__                                        | 2.25       | 0.21      | 1.45    | 1.52    | 2.4      | 16.4  |
| Bacteria;__Bacteroidetes;__Flavobacteria;__Flavobacteriales;__Flavobacteriaceae;__Flavobacterium        | 2.2        | 3.15      | 1.32    | 1.48    | 2.18     | 18.58 |
| Bacteria;__Proteobacteria;__Betaproteobacteria;__Burkholderiales;__Burkholderiaceae;__Polynucleobacter  | 1.75       | 2.03      | 1.24    | 1.1     | 2.05     | 20.63 |
| Eukaryota;__Chloroplastida;__Chlorophyceae;Other;Other;Other                                            | 1.85       | 0.11      | 1.22    | 1.38    | 2.02     | 22.65 |
| Bacteria;__Actinobacteria;__Actinobacteria;__Micrococcales;__Microbacteriaceae;Other                    | 1.99       | 1.18      | 1.12    | 1.14    | 1.86     | 24.51 |
| Bacteria;__Proteobacteria;__Betaproteobacteria;__Burkholderiales;__Comamonadaceae;Other                 | 2.66       | 2.78      | 1.04    | 1.11    | 1.72     | 26.23 |
| Bacteria;__Proteobacteria;__Alphaproteobacteria;__Rhodobacterales;__Rhodobacteraceae;Other              | 1.03       | 1.79      | 1.02    | 1.55    | 1.69     | 27.92 |
| Bacteria;__Proteobacteria;__Betaproteobacteria;__Burkholderiales;__Comamonadaceae;__Polaromonas         | 1.23       | 2         | 0.82    | 1.36    | 1.36     | 29.29 |
| Bacteria;__Bacteroidetes;__Sphingobacteriia;__Sphingobacteriales;__Chitinophagaceae;__Sediminibacterium | 0.11       | 1.15      | 0.77    | 2.16    | 1.27     | 30.56 |
| Bacteria;__Actinobacteria;__Actinobacteria;__Frankiales;__Sporichthyaceae;Other                         | 1.02       | 1.02      | 0.75    | 1.08    | 1.24     | 31.8  |
| Eukaryota;__Rhizaria;__Cercozoa;__Thecofilosea;Other;Other                                              | 0.08       | 1.1       | 0.75    | 1.59    | 1.24     | 33.04 |
| Eukaryota;__Rhizaria;__Cercozoa;__Endomyxa;__Novel Clade 10;__                                          | 1.09       | 0.12      | 0.69    | 1.84    | 1.15     | 34.2  |
| Bacteria;__Bacteroidetes;__Sphingobacteriia;__Sphingobacteriales;__Sphingobacteriaceae;__Pedobacter     | 0.17       | 1.06      | 0.69    | 1.58    | 1.14     | 35.33 |
| Bacteria;__Proteobacteria;__Betaproteobacteria;__Burkholderiales;__Comamonadaceae;__g                   | 0.45       | 1.15      | 0.67    | 1.26    | 1.11     | 36.44 |
| Bacteria;__Bacteroidetes;__Sphingobacteriia;__Sphingobacteriales;__NS11-12_marine_group;__g             | 0.41       | 1.14      | 0.66    | 1.29    | 1.09     | 37.53 |
| Eukaryota;__Chloroplastida;__Chlorophyceae;__Desmodesmus;__;__                                          | 0.27       | 1.02      | 0.65    | 1.04    | 1.07     | 38.6  |
| Bacteria;__Proteobacteria;__Betaproteobacteria;__Burkholderiales;__Comamonadaceae;__Simplicispira       | 0.91       | 1.25      | 0.58    | 1.34    | 0.96     | 39.56 |
| Bacteria;__Bacteroidetes;__Flavobacteria;__Flavobacteriales;__Cryomorphaeae;__Fluviicola                | 0.14       | 0.9       | 0.57    | 2.17    | 0.94     | 40.5  |
| Bacteria;__Bacteroidetes;__Sphingobacteriia;__Sphingobacteriales;__Chitinophagaceae;__Ferruginibacter   | 0.17       | 0.86      | 0.54    | 1.41    | 0.9      | 41.4  |
| Bacteria;__Bacteroidetes;__Sphingobacteriia;__Sphingobacteriales;__Saprosiraceae;__g                    | 0.07       | 0.76      | 0.53    | 0.93    | 0.88     | 42.28 |
| Bacteria;__Proteobacteria;__Betaproteobacteria;__Burkholderiales;__Comamonadaceae;__Paucibacter         | 0.61       | 0.97      | 0.51    | 1.11    | 0.85     | 43.13 |
| Bacteria;__Proteobacteria;__Alphaproteobacteria;__Rhodospirillales;__Acetobacteraceae;__Roseococcus     | 0.08       | 0.71      | 0.48    | 1.37    | 0.8      | 43.93 |
| Bacteria;__Actinobacteria;Other;Other;Other;Other                                                       | 0.15       | 0.78      | 0.48    | 1.33    | 0.79     | 44.72 |



|                                                                                                           |      |      |      |      |      |       |
|-----------------------------------------------------------------------------------------------------------|------|------|------|------|------|-------|
| Bacteria;__Candidate_division_OP11;__c;__o;__f;__g                                                        | 0.55 | 0.72 | 0.47 | 1.14 | 0.78 | 45.5  |
| Bacteria;__Proteobacteria;__Alphaproteobacteria;__Sphingomonadales;__Sphingomonadaceae;__Novosphingobium  | 0.06 | 0.68 | 0.46 | 1.83 | 0.76 | 46.26 |
| Bacteria;__Proteobacteria;__Betaproteobacteria;__Burkholderiales;__Comamonadaceae;__Albidiferax           | 0.3  | 0.77 | 0.45 | 2.1  | 0.75 | 47.01 |
| Eukaryota;__Fungi;__Chytridiomycota;__;__                                                                 | 0.86 | 0.63 | 0.45 | 1.46 | 0.75 | 47.76 |
| Bacteria;__Proteobacteria;__Betaproteobacteria;__Burkholderiales;__Alcaligenaceae;__Achromobacter         | 1.09 | 0.67 | 0.43 | 1.76 | 0.71 | 48.46 |
| Bacteria;__Bacteroidetes;__Sphingobacteriia;__Sphingobacteriales;__Chitinophagaceae;__g                   | 0.28 | 0.71 | 0.42 | 1.15 | 0.7  | 49.16 |
| Eukaryota;__Rhizaria;__Cercozoa;__Endomyxa;__Phytomyxea;__Spongospora                                     | 0.59 | 0    | 0.42 | 2.48 | 0.7  | 49.86 |
| Eukaryota;__Stramenopiles;__Diatomea;__Bacillariophytina;__Mediophyceae;Other                             | 0.58 | 0.04 | 0.4  | 1.43 | 0.66 | 50.52 |
| Bacteria;__Actinobacteria;__Acidimicrobiia;__Acidimicrobiales;__Acidimicrobiaceae;__CL500-29_marine_group | 0.03 | 0.49 | 0.37 | 0.98 | 0.61 | 51.13 |
| Bacteria;__Proteobacteria;__Gammaproteobacteria;__Pseudomonadales;__Moraxellaceae;__Perlucidibaca         | 0.27 | 0.76 | 0.36 | 1.48 | 0.6  | 51.73 |
| Bacteria;__Bacteroidetes;__Cytophagia;__Cytophagales;__Cytophagaceae;__Leadbetterella                     | 0.14 | 0.5  | 0.33 | 1.36 | 0.55 | 52.29 |
| Archaea;__Euryarchaeota;__Methanomicrobia;__Methanomicrobiales;__Methanoregulaceae;__Methanoregula        | 0.19 | 0.61 | 0.32 | 4.51 | 0.52 | 52.81 |
| Archaea;__Euryarchaeota;__Halobacteria;__Halobacteriales;__Deep_Sea_Hydrothermal_Vent_Gp_6(DHVEG-6);__g   | 0.29 | 0.41 | 0.31 | 1.26 | 0.51 | 53.32 |
| Bacteria;__Actinobacteria;__Acidimicrobiia;__Acidimicrobiales;__uncultured;__g                            | 0    | 0.41 | 0.31 | 2.8  | 0.51 | 53.83 |
| Bacteria;__Actinobacteria;__Actinobacteria;__Micrococcales;__Microbacteriaceae;__Candidatus_Limnoluna     | 0.45 | 0.12 | 0.3  | 1.17 | 0.5  | 54.33 |
| Bacteria;__WCHB1-60;__c;__o;__f;__g                                                                       | 0.18 | 0.37 | 0.3  | 1.08 | 0.49 | 54.82 |
| Bacteria;__Candidate_division_TM7;__c;__o;__f;__g                                                         | 0.23 | 0.41 | 0.29 | 1.08 | 0.48 | 55.31 |
| Bacteria;__Bacteroidetes;__Sphingobacteriia;__Sphingobacteriales;__Chitinophagaceae;__Filimonas           | 0.26 | 0.42 | 0.29 | 1.16 | 0.47 | 55.78 |
| Bacteria;__Actinobacteria;__Actinobacteria;__Micrococcales;__Microbacteriaceae;__Candidatus_Aquiluna      | 0.53 | 0.62 | 0.28 | 1.22 | 0.46 | 56.24 |
| Bacteria;__Candidate_division_OD1;__c;__o;__f;__g                                                         | 0.2  | 0.3  | 0.28 | 1.33 | 0.46 | 56.71 |
| Bacteria;__Proteobacteria;__Betaproteobacteria;__Burkholderiales;Other;Other                              | 0.38 | 0.53 | 0.27 | 1.62 | 0.45 | 57.15 |
| Bacteria;__Bacteroidetes;__Sphingobacteriia;__Sphingobacteriales;__WCHB1-69;__g                           | 0.24 | 0.44 | 0.27 | 1.15 | 0.44 | 57.59 |
| Eukaryota;__Stramenopiles;__Bicosoecida;__Siluanidae;__Siluania;__                                        | 0.36 | 0    | 0.26 | 1.8  | 0.43 | 58.02 |
| Bacteria;__Gemmatimonadetes;__Gemmatimonadetes;__Gemmatimonadales;__Gemmatimonadaceae;__Gemmatimonas      | 0    | 0.35 | 0.26 | 1.69 | 0.42 | 58.45 |
| Bacteria;__Proteobacteria;__Gammaproteobacteria;__Pseudomonadales;__Moraxellaceae;__Psychrobacter         | 0.5  | 0.53 | 0.25 | 1.3  | 0.42 | 58.87 |
| Bacteria;__Proteobacteria;__Alphaproteobacteria;__Rickettsiales;__mitochondria;__g                        | 0.37 | 0.02 | 0.25 | 1.63 | 0.42 | 59.29 |
| Unassigned;Other;Other;Other;Other;Other                                                                  | 1.1  | 0.91 | 0.25 | 1.6  | 0.41 | 59.7  |
| Bacteria;__Proteobacteria;__Betaproteobacteria;__Burkholderiales;__Comamonadaceae;__Acidovorax            | 0.13 | 0.38 | 0.25 | 2.12 | 0.41 | 60.11 |

|                                                                                                                               |      |      |      |      |      |       |
|-------------------------------------------------------------------------------------------------------------------------------|------|------|------|------|------|-------|
| Eukaryota;__Alveolata;__Ciliophora;__Spirotrichea;__Hypotrichia;__Gonostomum                                                  | 0.29 | 0    | 0.24 | 0.67 | 0.4  | 60.51 |
| Eukaryota;__Alveolata;__Protalveolata;__Colpodellida;Other;Other                                                              | 0.33 | 0    | 0.23 | 1.26 | 0.39 | 60.89 |
| Bacteria;__Fusobacteria;__Fusobacteria;__Fusobacteriales;__Fusobacteriaceae;__Fusobacterium                                   | 0.36 | 0.38 | 0.23 | 1.23 | 0.38 | 61.27 |
| Bacteria;__Verrucomicrobia;__Opitutae;__Opitutales;__Opitutaceae;__Opitutus                                                   | 0.1  | 0.36 | 0.23 | 1.45 | 0.37 | 61.65 |
| Bacteria;__Proteobacteria;__Betaproteobacteria;__Burkholderiales;__Alcaligenaceae;Other                                       | 0.57 | 0.64 | 0.22 | 1.65 | 0.37 | 62.01 |
| Bacteria;__Bacteroidetes;__Bacteroidia;__Bacteroidales;__Bacteroidaceae;__Bacteroides                                         | 0.31 | 0.21 | 0.21 | 1.19 | 0.35 | 62.36 |
| Eukaryota;__Chloroplastida;__Trebouxiophyceae;__;__;__                                                                        | 0.4  | 0.13 | 0.21 | 1.57 | 0.35 | 62.71 |
| Archaea;__Euryarchaeota;__Halobacteria;__Halobacteriales;__Deep_Sea_Hydrothermal_Vent_Gp_6(DHVEG-6);__Candidatus_Parvarchaeum | 0.19 | 0.3  | 0.21 | 1.3  | 0.35 | 63.06 |
| Bacteria;__Proteobacteria;__Alphaproteobacteria;__Rhodobacterales;__Rhodobacteraceae;__Rhodobacter                            | 0.33 | 0.32 | 0.21 | 1.21 | 0.34 | 63.4  |
| Bacteria;__Proteobacteria;__Betaproteobacteria;Other;Other;Other                                                              | 0.64 | 0.54 | 0.2  | 1.32 | 0.33 | 63.74 |
| Bacteria;__Proteobacteria;__Betaproteobacteria;__Neisseriales;__Neisseriaceae;__g                                             | 0    | 0.27 | 0.2  | 2.08 | 0.33 | 64.06 |
| Bacteria;__Actinobacteria;__Actinobacteria;__Micrococcales;__Microbacteriaceae;__Candidatus_Planktoluna                       | 0.28 | 0.04 | 0.19 | 1    | 0.32 | 64.38 |
| Eukaryota;__Fungi;__LKM11;__;__;__                                                                                            | 0    | 0.26 | 0.19 | 2.61 | 0.32 | 64.7  |
| Bacteria;__Proteobacteria;__Deltaproteobacteria;__Bdellovibrionales;__Bacteriovoracaceae;__Bacteriovorax                      | 0.24 | 0.5  | 0.19 | 1.72 | 0.32 | 65.02 |
| Bacteria;__Proteobacteria;__Alphaproteobacteria;__Sphingomonadales;__Sphingomonadaceae;__Sandarakinorhabdus                   | 0.04 | 0.27 | 0.19 | 1.32 | 0.32 | 65.34 |
| Bacteria;__Proteobacteria;__Betaproteobacteria;__Burkholderiales;__Alcaligenaceae;__Pusillimonas                              | 0.2  | 0.14 | 0.19 | 1.11 | 0.32 | 65.65 |
| Eukaryota;__Stramenopiles;__Chrysophyceae;__Chromulinales;__Phaeoplaca;__                                                     | 0.26 | 0    | 0.19 | 8.34 | 0.32 | 65.97 |
| Bacteria;__Proteobacteria;__Gammaproteobacteria;__Xanthomonadales;__Xanthomonadaceae;__Arenimonas                             | 0.38 | 0.15 | 0.18 | 1.5  | 0.31 | 66.28 |
| Bacteria;__Proteobacteria;__Gammaproteobacteria;__Oceanospirillales;__oc58;__g                                                | 0.27 | 0.39 | 0.18 | 1.25 | 0.3  | 66.58 |
| Eukaryota;__Metazoa;__Arthropoda;__Maxillopoda;__;__                                                                          | 0.24 | 0    | 0.18 | 4.11 | 0.3  | 66.88 |
| Bacteria;__Firmicutes;__Clostridia;__Clostridiales;__Ruminococcaceae;__g                                                      | 0.35 | 0.24 | 0.18 | 1.34 | 0.3  | 67.18 |
| Bacteria;__Proteobacteria;__Betaproteobacteria;__Burkholderiales;__Comamonadaceae;__Hydrogenophaga                            | 0.26 | 0.06 | 0.17 | 1.2  | 0.29 | 67.46 |
| Bacteria;__Actinobacteria;__Actinobacteria;__Micrococcales;__Microbacteriaceae;__Alpinimonas                                  | 0.19 | 0.08 | 0.17 | 0.87 | 0.28 | 67.75 |
| Bacteria;__Proteobacteria;__Betaproteobacteria;__Burkholderiales;__Comamonadaceae;__Rhizobacter                               | 0.06 | 0.28 | 0.17 | 1.72 | 0.28 | 68.03 |
| Bacteria;__Proteobacteria;__Betaproteobacteria;__Rhodocyclales;__Rhodocyclaceae;__Dechloromonas                               | 0.23 | 0    | 0.17 | 2.96 | 0.28 | 68.3  |
| Bacteria;__Bacteroidetes;__Bacteroidia;__Bacteroidales;__Prevotellaceae;__Prevotella                                          | 0.19 | 0.24 | 0.16 | 1.23 | 0.27 | 68.57 |
| Bacteria;__Proteobacteria;__Deltaproteobacteria;__Syntrophobacteriales;__Syntrophaceae;__Smithella                            | 0.17 | 0.16 | 0.16 | 2.52 | 0.27 | 68.85 |
| Eukaryota;__Alveolata;__Ciliophora;__Conthreep;__Oligohymenophorea;Other                                                      | 0.27 | 0.17 | 0.16 | 1.26 | 0.26 | 69.11 |
| Bacteria;__Proteobacteria;__Betaproteobacteria;__Burkholderiales;__Oxalobacteraceae;__Undibacterium                           | 0.36 | 0.28 | 0.16 | 1.74 | 0.26 | 69.36 |

|                                                                                                            |      |      |      |      |      |       |
|------------------------------------------------------------------------------------------------------------|------|------|------|------|------|-------|
| Bacteria;__Proteobacteria;__Gammaproteobacteria;__Alteromonadales;__Alteromonadaceae;__BD1-7_clade         | 0.18 | 0.29 | 0.16 | 1.3  | 0.26 | 69.62 |
| Eukaryota;__Stramenopiles;__T53A1;__;__                                                                    | 0.37 | 0.24 | 0.15 | 1.33 | 0.26 | 69.88 |
| Bacteria;__Proteobacteria;__Alphaproteobacteria;__Rhodobacterales;__Rhodobacteraceae;__Paracoccus          | 0.11 | 0.18 | 0.15 | 1.1  | 0.25 | 70.13 |
| Bacteria;__Proteobacteria;__Deltaproteobacteria;__Myxococcales;__0319-6G20;__g                             | 0.41 | 0.36 | 0.15 | 1.41 | 0.25 | 70.38 |
| Eukaryota;__Chloroplastida;__Chlorophyceae;__;__                                                           | 0.22 | 0.02 | 0.15 | 1.29 | 0.25 | 70.63 |
| Bacteria;__Proteobacteria;__Gammaproteobacteria;__Xanthomonadales;__Xanthomonadaceae;Other                 | 0.21 | 0    | 0.15 | 1.14 | 0.25 | 70.87 |
| Eukaryota;__Alveolata;__Ciliophora;__Conthreep;__Prostomatea;__Cryptocaryon                                | 0.26 | 0.08 | 0.15 | 2    | 0.24 | 71.12 |
| Bacteria;__Proteobacteria;__Betaproteobacteria;__Burkholderiales;__Burkholderiaceae;__Ralstonia            | 0.23 | 0.13 | 0.15 | 1.24 | 0.24 | 71.36 |
| Eukaryota;__Stramenopiles;__Chrysophyceae;Other;Other;Other                                                | 0.02 | 0.22 | 0.14 | 2.55 | 0.24 | 71.59 |
| Bacteria;__Firmicutes;__Bacilli;__Bacillales;__Staphylococcaceae;Other                                     | 0.2  | 0.23 | 0.14 | 1.39 | 0.23 | 71.83 |
| Bacteria;__Actinobacteria;__Actinobacteria;Other;Other;Other                                               | 0.03 | 0.19 | 0.14 | 1.29 | 0.23 | 72.06 |
| Bacteria;__Bacteroidetes;__vadinHA17;__o;__f;__g                                                           | 0.16 | 0.34 | 0.14 | 1.36 | 0.23 | 72.29 |
| Bacteria;__Proteobacteria;__Betaproteobacteria;__Nitrosomonadales;__Nitrosomonadaceae;__Nitrosomonas       | 0.14 | 0.21 | 0.14 | 1.2  | 0.23 | 72.51 |
| Bacteria;__Proteobacteria;__Gammaproteobacteria;__Oceanospirillales;__Oceanospirillaceae;__Pseudospirillum | 0    | 0.18 | 0.14 | 1.27 | 0.23 | 72.74 |
| Bacteria;__Proteobacteria;__Betaproteobacteria;__Burkholderiales;__Comamonadaceae;__Comamonas              | 0.15 | 0.22 | 0.14 | 1.17 | 0.23 | 72.96 |
| Eukaryota;__Fungi;__Blastocladiomycota;__;__                                                               | 0.19 | 0    | 0.13 | 1.16 | 0.22 | 73.19 |
| Eukaryota;__Rhizaria;__Cercozoa;Other;Other;Other                                                          | 0.19 | 0.02 | 0.13 | 1.43 | 0.21 | 73.4  |
| Bacteria;__Firmicutes;__Bacilli;__Lactobacillales;__Aerococcaceae;__Globicatella                           | 0.14 | 0.13 | 0.13 | 1.14 | 0.21 | 73.61 |
| Bacteria;__Proteobacteria;__Alphaproteobacteria;__Rhizobiales;__Hyphomicrobiaceae;__Devosia                | 0    | 0.17 | 0.13 | 1.31 | 0.21 | 73.82 |
| Bacteria;__Bacteroidetes;__WCHB1-32;__o;__f;__g                                                            | 0    | 0.17 | 0.12 | 1.21 | 0.2  | 74.02 |
| Bacteria;__Bacteroidetes;Other;Other;Other                                                                 | 0.09 | 0.19 | 0.12 | 1.76 | 0.2  | 74.23 |
| Bacteria;__Actinobacteria;__Actinobacteria;__Corynebacteriales;__Mycobacteriaceae;__Mycobacterium          | 0.05 | 0.18 | 0.12 | 1.2  | 0.2  | 74.42 |
| Eukaryota;__Fungi;Other;Other;Other;Other                                                                  | 0.17 | 0.23 | 0.12 | 1.43 | 0.2  | 74.62 |
| Bacteria;__Bacteroidetes;__Flavobacteria;__Flavobacteriales;__NS9_marine_group;__g                         | 0.09 | 0.21 | 0.12 | 1.51 | 0.2  | 74.82 |
| Bacteria;__Proteobacteria;__Alphaproteobacteria;__Caulobacterales;__Caulobacteraceae;__Phenylobacterium    | 0    | 0.16 | 0.12 | 1.32 | 0.19 | 75.01 |
| Bacteria;__Proteobacteria;__Alphaproteobacteria;__Caulobacterales;__Caulobacteraceae;__Brevundimonas       | 0.07 | 0.14 | 0.11 | 1.07 | 0.19 | 75.2  |
| Bacteria;__Bacteroidetes;__Sphingobacteriia;__Sphingobacteriales;Other;Other                               | 0.02 | 0.17 | 0.11 | 2.51 | 0.19 | 75.39 |
| Eukaryota;__Stramenopiles;__Eustigmatales;__Nannochloropsis;__;__                                          | 0.16 | 0    | 0.11 | 1.32 | 0.19 | 75.58 |
| Bacteria;__Bacteroidetes;__Sphingobacteriia;__Sphingobacteriales;__env.OPS_17;__g                          | 0.13 | 0.25 | 0.11 | 1.51 | 0.19 | 75.76 |
| Bacteria;__Candidate_division_OP3;__c;__o;__f;__g                                                          | 0.11 | 0.11 | 0.11 | 1.41 | 0.19 | 75.95 |
| Eukaryota;__Stramenopiles;__CCI40;__;__                                                                    | 0.16 | 0    | 0.11 | 1.3  | 0.19 | 76.14 |

|                                                                                                         |      |      |      |      |      |       |
|---------------------------------------------------------------------------------------------------------|------|------|------|------|------|-------|
| Bacteria;__Cyanobacteria;__Cyanobacteria;__SubsectionIII;__FamilyI;__g                                  | 0.14 | 0.1  | 0.11 | 1.11 | 0.19 | 76.32 |
| Bacteria;__Bacteroidetes;__Flavobacteria;__Flavobacteriales;__Flavobacteriaceae;__Chryseobacterium      | 0.18 | 0.08 | 0.11 | 1.16 | 0.19 | 76.51 |
| Bacteria;__Firmicutes;__Bacilli;__Lactobacillales;__Carnobacteriaceae;__Atopostipes                     | 0.16 | 0    | 0.11 | 1.27 | 0.18 | 76.69 |
| Bacteria;__Proteobacteria;Other;Other;Other;Other                                                       | 0.11 | 0.24 | 0.11 | 1.27 | 0.18 | 76.88 |
| Bacteria;__Bacteroidetes;__Bacteroidia;__Bacteroidales;__Rikenellaceae;__Alistipes                      | 0.17 | 0.09 | 0.11 | 1.32 | 0.18 | 77.06 |
| Bacteria;__Proteobacteria;__Gammaproteobacteria;__Legionellales;__Legionellaceae;__Legionella           | 0.1  | 0.11 | 0.11 | 1.81 | 0.18 | 77.23 |
| Bacteria;__Proteobacteria;__Deltaproteobacteria;__Desulfuromonadales;Other;Other                        | 0.04 | 0.16 | 0.11 | 1.44 | 0.18 | 77.41 |
| Bacteria;__Proteobacteria;__Betaproteobacteria;__Burkholderiales;__Comamonadaceae;__Pelomonas           | 0.17 | 0.12 | 0.11 | 1.27 | 0.18 | 77.59 |
| Bacteria;__Proteobacteria;__Alphaproteobacteria;__Rhodospirillales;__Acetobacteraceae;__g               | 0    | 0.15 | 0.11 | 1.31 | 0.18 | 77.76 |
| Eukaryota;__Alveolata;__Dinoflagellata;__Dinophyceae;__Gymnodiniphyceidae;__FV18-2D9                    | 0.16 | 0.05 | 0.11 | 1.45 | 0.17 | 77.94 |
| Bacteria;__Bacteroidetes;__Cytophagia;__Cytophagales;__Cytophagaceae;__Emticicia                        | 0.12 | 0.13 | 0.1  | 1.44 | 0.17 | 78.1  |
| Bacteria;__Proteobacteria;__Deltaproteobacteria;__Bdellovibrionales;__Bdellovibrionaceae;__Bdellovibrio | 0.13 | 0.09 | 0.1  | 4.78 | 0.17 | 78.27 |
| Bacteria;__Proteobacteria;__Gammaproteobacteria;__Xanthomonadales;__Sinobacteraceae;__g                 | 0.17 | 0.04 | 0.1  | 2.26 | 0.17 | 78.43 |
| Bacteria;__Proteobacteria;__Gammaproteobacteria;__Legionellales;__Coxiellaceae;__Aquicella              | 0.07 | 0.14 | 0.1  | 1.24 | 0.16 | 78.6  |
| Bacteria;__Proteobacteria;__Betaproteobacteria;__Neisseriales;__Neisseriaceae;Other                     | 0.13 | 0.06 | 0.1  | 1.17 | 0.16 | 78.76 |
| Bacteria;__Cyanobacteria;__Cyanobacteria;__SubsectionIII;__FamilyI;__Chamaesiphon                       | 0.13 | 0    | 0.1  | 2.08 | 0.16 | 78.92 |
| Bacteria;Other;Other;Other;Other;Other                                                                  | 0.13 | 0.19 | 0.1  | 1.28 | 0.16 | 79.08 |
| Bacteria;__Firmicutes;__Clostridia;__Clostridiales;__Ruminococcaceae;__Incertae_Sedis                   | 0.13 | 0.11 | 0.09 | 1.57 | 0.16 | 79.24 |
| Bacteria;__Chlamydiae;__Chlamydiae;__Chlamydiales;__Parachlamydiaceae;__Neochlamydia                    | 0.1  | 0.04 | 0.09 | 0.88 | 0.16 | 79.39 |
| Bacteria;__Actinobacteria;__Actinobacteria;__Propionibacteriales;__Propionibacteriaceae;Other           | 0    | 0.12 | 0.09 | 0.66 | 0.15 | 79.55 |
| Eukaryota;__Stramenopiles;__Chrysophyceae;__Ochromonadales;__Paraphysomonas;__                          | 0.14 | 0.03 | 0.09 | 1.55 | 0.15 | 79.7  |
| Bacteria;__Proteobacteria;__Gammaproteobacteria;Other;Other;Other                                       | 0.09 | 0.2  | 0.09 | 1.18 | 0.15 | 79.85 |
| Bacteria;__Proteobacteria;__Gammaproteobacteria;__Pseudomonadales;__Moraxellaceae;__Alkanindiges        | 0.13 | 0    | 0.09 | 1.31 | 0.15 | 80    |
| Eukaryota;__RT5iin25;__;__;__                                                                           | 0.04 | 0.11 | 0.09 | 0.83 | 0.15 | 80.14 |

#### Groups Atlas Pool & Atlas Cove

Average dissimilarity = 92.23

| Species                                                                          | Atlas Pool | Atlas Cove | Av.Diss | Diss/SD | Contrib% | Cum.% |
|----------------------------------------------------------------------------------|------------|------------|---------|---------|----------|-------|
|                                                                                  | Av.Abund   | Av.Abund   |         |         |          |       |
| Eukaryota;__Alveolata;__Ciliophora;__Spirotrichea;__Hypotrichia;Other            | 3.49       | 0          | 2.73    | 2.71    | 2.97     | 2.97  |
| Bacteria;__Proteobacteria;__Gammaproteobacteria;__Oceanospirillales;__ZD0405;__g | 0          | 3.19       | 2.55    | 1.93    | 2.77     | 5.73  |
| Bacteria;__Proteobacteria;__Gammaproteobacteria;Other;Other;Other                | 0.09       | 3.15       | 2.35    | 2.63    | 2.55     | 8.29  |

|                                                                                                                           |      |      |      |      |      |       |
|---------------------------------------------------------------------------------------------------------------------------|------|------|------|------|------|-------|
| Bacteria;__Proteobacteria;__Alphaproteobacteria;__SAR11_clade;__Surface_1;__g                                             | 0    | 2.82 | 2.28 | 1.36 | 2.47 | 10.76 |
| Bacteria;__Proteobacteria;__Betaproteobacteria;__Burkholderiales;__Comamonadaceae;Other                                   | 2.66 | 0.03 | 1.92 | 1.87 | 2.09 | 12.85 |
| Bacteria;__Actinobacteria;__Actinobacteria;__Frankiales;__Sporichthyaceae;__hgcl_clade                                    | 2.32 | 0    | 1.91 | 0.92 | 2.07 | 14.92 |
| Bacteria;__Cyanobacteria;__Chloroplast;__Chloroplast;__Chloroplast;__Chloroplast                                          | 3.27 | 2.38 | 1.7  | 1.23 | 1.85 | 16.77 |
| Eukaryota;__Chloroplastida;__Chlorophyceae;__Chlamydomonas;__;__                                                          | 2.25 | 0    | 1.64 | 1.65 | 1.78 | 18.55 |
| Bacteria;__Bacteroidetes;__Flavobacteria;__Flavobacteriales;__Flavobacteriaceae;__Flavobacterium                          | 2.2  | 0.03 | 1.61 | 2.39 | 1.75 | 20.3  |
| Bacteria;__Actinobacteria;__Actinobacteria;__Micrococcales;__Microbacteriaceae;Other                                      | 1.99 | 0    | 1.6  | 1.16 | 1.74 | 22.04 |
| Bacteria;__Proteobacteria;__Gammaproteobacteria;__Alteromonadales;__Alteromonadaceae;__SAR92_clade                        | 0    | 2.09 | 1.6  | 2.36 | 1.73 | 23.77 |
| Bacteria;__Proteobacteria;__Gammaproteobacteria;__Oceanospirillales;__SAR86_clade;__g                                     | 0    | 1.99 | 1.57 | 2.34 | 1.71 | 25.47 |
| Bacteria;__Bacteroidetes;__Flavobacteria;__Flavobacteriales;__Flavobacteriaceae;__NS2b_marine_group                       | 0    | 1.92 | 1.49 | 3.75 | 1.62 | 27.09 |
| Bacteria;__Proteobacteria;__Betaproteobacteria;__Burkholderiales;__Burkholderiaceae;__Polynucleobacter                    | 1.75 | 0    | 1.42 | 1.06 | 1.54 | 28.63 |
| Eukaryota;__Chloroplastida;__Chlorophyceae;Other;Other;Other                                                              | 1.85 | 0    | 1.34 | 1.47 | 1.45 | 30.09 |
| Bacteria;__Bacteroidetes;__Flavobacteria;__Flavobacteriales;__Flavobacteriaceae;__Polaribacter                            | 0    | 1.7  | 1.3  | 4.16 | 1.41 | 31.5  |
| Bacteria;__Proteobacteria;__Alphaproteobacteria;__Rhodobacterales;__Rhodobacteraceae;__Roseobacter_clade_DC5-80-3_lineage | 0    | 1.59 | 1.25 | 2.76 | 1.35 | 32.85 |
| Bacteria;__Bacteroidetes;__Flavobacteria;__Flavobacteriales;__NS9_marine_group;__g                                        | 0.09 | 1.54 | 1.1  | 6.69 | 1.2  | 34.05 |
| Bacteria;__Bacteroidetes;__Flavobacteria;__Flavobacteriales;__Flavobacteriaceae;__NS4_marine_group                        | 0    | 1.31 | 1.05 | 1.84 | 1.14 | 35.19 |
| Archaea;__Euryarchaeota;__Thermoplasmata;__Thermoplasmatales;__Marine_Group_II;__g                                        | 0    | 1.28 | 1.02 | 1.92 | 1.11 | 36.3  |
| Bacteria;__Proteobacteria;__Betaproteobacteria;__Burkholderiales;__Comamonadaceae;__Polaromonas                           | 1.23 | 0    | 0.91 | 1.99 | 0.99 | 37.29 |
| Bacteria;__Proteobacteria;__Betaproteobacteria;__Burkholderiales;__Alcaligenaceae;__Achromobacter                         | 1.09 | 0    | 0.84 | 2.17 | 0.91 | 38.2  |
| Bacteria;__Actinobacteria;__Actinobacteria;__Frankiales;__Sporichthyaceae;Other                                           | 1.02 | 0    | 0.84 | 0.94 | 0.91 | 39.11 |
| Eukaryota;__Rhizaria;__Cerczoa;__Endomyxa;__Novel Clade 10;__                                                             | 1.09 | 0    | 0.81 | 2.07 | 0.88 | 39.99 |
| Bacteria;__Proteobacteria;__Gammaproteobacteria;__Alteromonadales;__Pseudoalteromonadaceae;__Pseudoalteromonas            | 0.08 | 1.18 | 0.8  | 1.48 | 0.87 | 40.86 |
| Bacteria;__Proteobacteria;__Gammaproteobacteria;__Alteromonadales;__Alteromonadaceae;__Alteromonas                        | 0    | 1.1  | 0.78 | 1.32 | 0.85 | 41.71 |
| Bacteria;__Bacteroidetes;__Flavobacteria;__Flavobacteriales;__Flavobacteriaceae;Other                                     | 0.03 | 1.01 | 0.78 | 1.64 | 0.85 | 42.56 |
| Bacteria;__Proteobacteria;__Alphaproteobacteria;__SAR11_clade;Other;Other                                                 | 0    | 0.9  | 0.72 | 1.66 | 0.78 | 43.34 |
| Eukaryota;__Stramenopiles;__MAST-1;__MAST-1 B;__;__                                                                       | 0    | 1    | 0.72 | 1.29 | 0.78 | 44.11 |
| Bacteria;__Proteobacteria;__Betaproteobacteria;__Burkholderiales;__Comamonadaceae;__Simplicispira                         | 0.91 | 0    | 0.66 | 1.95 | 0.72 | 44.83 |
| Bacteria;__Proteobacteria;__Alphaproteobacteria;__Rhodobacterales;__Rhodobacteraceae;__g                                  | 0.03 | 0.85 | 0.63 | 2.06 | 0.68 | 45.51 |
| Eukaryota;__Fungi;__Chytridiomycota;__;__;__                                                                              | 0.86 | 0    | 0.62 | 1.76 | 0.67 | 46.19 |
| Bacteria;__Bacteroidetes;__Flavobacteria;__Flavobacteriales;Other;Other                                                   | 0    | 0.84 | 0.62 | 2.34 | 0.67 | 46.85 |
| Eukaryota;Other;Other;Other;Other;Other                                                                                   | 0.09 | 0.97 | 0.61 | 0.81 | 0.67 | 47.52 |

|                                                                                                       |      |      |      |      |      |       |
|-------------------------------------------------------------------------------------------------------|------|------|------|------|------|-------|
| Eukaryota;__Haptophyta;__Prymnesiophyceae;Other;Other;Other                                           | 0    | 0.86 | 0.61 | 1.32 | 0.66 | 48.18 |
| Bacteria;__Proteobacteria;__Alphaproteobacteria;__Rhodobacterales;__Rhodobacteraceae;Other            | 1.03 | 0.29 | 0.57 | 1.59 | 0.62 | 48.8  |
| Bacteria;__Actinobacteria;__Actinobacteria;__PeM15;__f;__g                                            | 0.79 | 0.08 | 0.57 | 1.11 | 0.62 | 49.41 |
| Eukaryota;__Alveolata;__Dinoflagellata;__Dinophyceae;__Gymnodiniphyceae;__Gyrodinium                  | 0    | 0.77 | 0.52 | 0.75 | 0.57 | 49.98 |
| Archaea;__Thaumarchaeota;__Marine_Group_I;__o;__f;__g                                                 | 0    | 0.65 | 0.52 | 1.5  | 0.56 | 50.55 |
| Bacteria;__Proteobacteria;__Alphaproteobacteria;__Rhodobacterales;__Rhodobacteraceae;__Sulfitobacter  | 0    | 0.73 | 0.52 | 1.3  | 0.56 | 51.11 |
| Bacteria;__Proteobacteria;__Gammaproteobacteria;__Oceanospirillales;__Oceanospirillaceae;Other        | 0    | 0.68 | 0.52 | 4.49 | 0.56 | 51.67 |
| Eukaryota;__Metazoa;__Arthropoda;__Maxillopoda;__;                                                    | 0.24 | 0.78 | 0.49 | 0.88 | 0.54 | 52.21 |
| Bacteria;__Bacteroidetes;__Flavobacteria;__Flavobacteriales;__Flavobacteriaceae;__NS5_marine_group    | 0    | 0.6  | 0.49 | 1.26 | 0.53 | 52.74 |
| Bacteria;__Proteobacteria;__Gammaproteobacteria;__Oceanospirillales;__Alcanivoracaceae;__Alcanivorax  | 0    | 0.67 | 0.49 | 2.39 | 0.53 | 53.27 |
| Eukaryota;__Picozoa;__;                                                                               | 0    | 0.68 | 0.48 | 1.28 | 0.52 | 53.78 |
| Eukaryota;__Alveolata;__Ciliophora;__Spirotrichea;__Oligotrichia;__uncultured                         | 0    | 0.66 | 0.47 | 1.17 | 0.51 | 54.29 |
| Bacteria;__Deferribacteres;__Deferribacteres;__Deferribacterales;__SAR406_clade(Marine_group_A);__g   | 0    | 0.55 | 0.46 | 1.17 | 0.5  | 54.79 |
| Bacteria;__Candidate_division_OP11;__c;__o;__f;__g                                                    | 0.55 | 0    | 0.45 | 0.86 | 0.49 | 55.28 |
| Bacteria;__Proteobacteria;__Alphaproteobacteria;__Rickettsiales;__SAR116_clade;__g                    | 0    | 0.57 | 0.45 | 2.57 | 0.49 | 55.77 |
| Bacteria;__Proteobacteria;__Betaproteobacteria;__Burkholderiales;__Comamonadaceae;__Paucibacter       | 0.61 | 0    | 0.45 | 1.78 | 0.49 | 56.26 |
| Eukaryota;__Stramenopiles;__MAST-7;__;                                                                | 0    | 0.62 | 0.45 | 1.25 | 0.49 | 56.75 |
| Bacteria;__Proteobacteria;__Betaproteobacteria;__Burkholderiales;__Alcaligenaceae;Other               | 0.57 | 0    | 0.44 | 2.18 | 0.47 | 57.22 |
| Eukaryota;__Stramenopiles;__MAST-3;__;                                                                | 0    | 0.61 | 0.44 | 1.29 | 0.47 | 57.7  |
| Eukaryota;__Rhizaria;__Cercozoa;__Endomyxa;__Phytomyxea;__Spongospora                                 | 0.59 | 0    | 0.43 | 2.42 | 0.47 | 58.16 |
| Bacteria;__Actinobacteria;__Actinobacteria;__Micrococcales;__Microbacteriaceae;__Candidatus_Aquiluna  | 0.53 | 0    | 0.42 | 1.41 | 0.46 | 58.62 |
| Bacteria;__Proteobacteria;__Gammaproteobacteria;__Oceanospirillales;__OM182_clade;__g                 | 0    | 0.55 | 0.42 | 2.23 | 0.45 | 59.08 |
| Bacteria;__Proteobacteria;__Gammaproteobacteria;__Alteromonadales;__Colwelliaceae;__Colwellia         | 0.05 | 0.61 | 0.4  | 1.33 | 0.44 | 59.51 |
| Eukaryota;__Stramenopiles;__Diatomea;__Bacillariophytina;__Mediophyceae;Other                         | 0.58 | 0.11 | 0.4  | 1.41 | 0.43 | 59.94 |
| Bacteria;__Proteobacteria;__Alphaproteobacteria;__SAR11_clade;__Surface_4;__g                         | 0    | 0.49 | 0.39 | 1.64 | 0.43 | 60.37 |
| Bacteria;__Actinobacteria;__Actinobacteria;__Micrococcales;__Microbacteriaceae;__Candidatus_Limnoluna | 0.45 | 0    | 0.36 | 1.19 | 0.39 | 60.76 |
| Bacteria;__Proteobacteria;__Gammaproteobacteria;__Pseudomonadales;__Moraxellaceae;__Psychrobacter     | 0.5  | 0    | 0.36 | 1.56 | 0.39 | 61.15 |
| Eukaryota;__Alveolata;__Protalveolata;__Syndiniales;__Syndiniales_Group_I;__                          | 0    | 0.48 | 0.34 | 1.3  | 0.37 | 61.52 |
| Bacteria;__Proteobacteria;__Gammaproteobacteria;__Alteromonadales;__Alteromonadaceae;Other            | 0    | 0.45 | 0.33 | 3.42 | 0.36 | 61.89 |
| Bacteria;__Proteobacteria;__Betaproteobacteria;__Burkholderiales;__Comamonadaceae;__g                 | 0.45 | 0    | 0.33 | 1.2  | 0.36 | 62.25 |
| Bacteria;__Proteobacteria;__Alphaproteobacteria;Other;Other;Other                                     | 0    | 0.42 | 0.33 | 1.76 | 0.36 | 62.61 |
| Bacteria;__Bacteroidetes;__Flavobacteria;__Flavobacteriales;__Cryomorphaeae;__Owenweeksia             | 0.07 | 0.47 | 0.32 | 1.87 | 0.35 | 62.96 |

|                                                                                                         |      |      |      |      |      |       |
|---------------------------------------------------------------------------------------------------------|------|------|------|------|------|-------|
| Eukaryota;__Alveolata;__Ciliophora;__Spirotrichea;__Oligotrichia;__Strombidium                          | 0    | 0.47 | 0.32 | 0.83 | 0.35 | 63.31 |
| Unassigned;Other;Other;Other;Other;Other                                                                | 1.1  | 1.01 | 0.32 | 1.41 | 0.35 | 63.65 |
| Bacteria;__Proteobacteria;__Deltaproteobacteria;__Myxococcales;__0319-6G20;__g                          | 0.41 | 0    | 0.32 | 2.46 | 0.34 | 64    |
| Bacteria;__Proteobacteria;__Betaproteobacteria;__Burkholderiales;Other;Other                            | 0.38 | 0    | 0.31 | 0.98 | 0.34 | 64.33 |
| Eukaryota;__Holozoa;__Choanomonada;__Acanthoecida;__Diaphanoeca;__                                      | 0    | 0.45 | 0.31 | 0.93 | 0.34 | 64.67 |
| Eukaryota;__Chloroplastida;__Trebouxiophyceae;__;__;__                                                  | 0.4  | 0    | 0.3  | 1.99 | 0.32 | 65    |
| Bacteria;__Bacteroidetes;__Flavobacteria;__Flavobacteriales;__Flavobacteriaceae;__NS3a_marine_group     | 0    | 0.38 | 0.29 | 6.05 | 0.32 | 65.31 |
| Eukaryota;__Alveolata;__Protalveolata;__Syndiniales;__Syndiniales Group II;__                           | 0    | 0.41 | 0.29 | 1.27 | 0.32 | 65.63 |
| Bacteria;__Bacteroidetes;__Sphingobacteria;__Sphingobacteriales;__NS11-12_marine_group;__g              | 0.41 | 0    | 0.29 | 1.47 | 0.32 | 65.95 |
| Bacteria;__Proteobacteria;__Deltaproteobacteria;__SAR324_clade(Marine_group_B);__f;__g                  | 0    | 0.35 | 0.29 | 1.3  | 0.31 | 66.26 |
| Bacteria;__Proteobacteria;__Gammaproteobacteria;__Xanthomonadales;__Xanthomonadaceae;__Arenimonas       | 0.38 | 0    | 0.29 | 2.09 | 0.31 | 66.57 |
| Eukaryota;__Stramenopiles;__MAST-1;__MAST-1 A;__;__                                                     | 0    | 0.4  | 0.28 | 1.31 | 0.3  | 66.88 |
| Eukaryota;__Stramenopiles;__T53A1;__;__;__                                                              | 0.37 | 0    | 0.28 | 1.96 | 0.3  | 67.18 |
| Bacteria;__Bacteroidetes;__Cytophagia;__Cytophagales;__Flammeovirgaceae;__Marinoscillum                 | 0    | 0.33 | 0.27 | 0.89 | 0.3  | 67.47 |
| Bacteria;__Bacteroidetes;__Flavobacteria;__Flavobacteriales;__Flavobacteriaceae;__g                     | 0.03 | 0.39 | 0.27 | 3.59 | 0.29 | 67.77 |
| Eukaryota;__Alveolata;__Dinoflagellata;__Dinophyceae;__Gymnodiniphyceidae;__Gymnodinium                 | 0    | 0.39 | 0.27 | 0.94 | 0.29 | 68.06 |
| Eukaryota;__Stramenopiles;__Bicosoecida;__Siluaniiidae;__Siluania;__                                    | 0.36 | 0    | 0.27 | 1.77 | 0.29 | 68.35 |
| Bacteria;__Proteobacteria;__Betaproteobacteria;__Burkholderiales;__Oxalobacteraceae;__Undibacterium     | 0.36 | 0    | 0.26 | 1.73 | 0.29 | 68.64 |
| Bacteria;__Proteobacteria;__Alphaproteobacteria;__SAR11_clade;__f;__g                                   | 0    | 0.32 | 0.26 | 1.15 | 0.28 | 68.92 |
| Bacteria;__Fusobacteria;__Fusobacteria;__Fusobacteriales;__Fusobacteriaceae;__Fusobacterium             | 0.36 | 0    | 0.26 | 1.24 | 0.28 | 69.2  |
| Bacteria;__Firmicutes;__Clostridia;__Clostridiales;__Ruminococcaceae;__g                                | 0.35 | 0    | 0.25 | 1.47 | 0.28 | 69.47 |
| Eukaryota;__Alveolata;__Ciliophora;__Spirotrichea;__Choreotrichia;__uncultured                          | 0    | 0.37 | 0.25 | 0.85 | 0.28 | 69.75 |
| Eukaryota;__Alveolata;__Dinoflagellata;__Dinophyceae;__Gymnodiniphyceidae;Other                         | 0.03 | 0.38 | 0.25 | 0.77 | 0.27 | 70.02 |
| Eukaryota;__Alveolata;__Ciliophora;__Spirotrichea;__Hypotrichia;__Gonostomum                            | 0.29 | 0    | 0.25 | 0.66 | 0.27 | 70.29 |
| Bacteria;__Proteobacteria;__Alphaproteobacteria;__Rickettsiales;__mitochondria;__g                      | 0.37 | 0.05 | 0.25 | 1.61 | 0.27 | 70.56 |
| Bacteria;__Proteobacteria;__Gammaproteobacteria;__Pseudomonadales;__Moraxellaceae;__Perlucidibaca       | 0.27 | 0.49 | 0.25 | 1.11 | 0.27 | 70.82 |
| Eukaryota;__Chloroplastida;__Mamiellophyceae;__Micromonas;__;__                                         | 0    | 0.33 | 0.24 | 1.14 | 0.26 | 71.09 |
| Bacteria;__Proteobacteria;__Gammaproteobacteria;__Oceanospirillales;Other;Other                         | 0    | 0.3  | 0.24 | 2.22 | 0.26 | 71.35 |
| Bacteria;__Proteobacteria;__Alphaproteobacteria;__Rhodobacterales;__Rhodobacteraceae;__Rhodobacter      | 0.33 | 0    | 0.24 | 1.3  | 0.26 | 71.61 |
| Eukaryota;__Alveolata;__Protalveolata;__Colpodellida;Other;Other                                        | 0.33 | 0    | 0.24 | 1.24 | 0.26 | 71.87 |
| Archaea;__Euryarchaeota;__Halobacteria;__Halobacteriales;__Deep_Sea_Hydrothermal_Vent_Gp_6(DHVEG-6);__g | 0.29 | 0    | 0.24 | 0.9  | 0.26 | 72.13 |
| Eukaryota;__Rhizaria;__Cercozoa;__Thecofilosea;__Cryomonadida;__Cryothecomonas                          | 0    | 0.34 | 0.23 | 0.88 | 0.25 | 72.38 |

|                                                                                                          |      |      |      |      |      |       |
|----------------------------------------------------------------------------------------------------------|------|------|------|------|------|-------|
| Bacteria;__Proteobacteria;__Betaproteobacteria;__Burkholderiales;__Comamonadaceae;__Albidiferax          | 0.3  | 0    | 0.23 | 6.38 | 0.25 | 72.63 |
| Bacteria;__Actinobacteria;__Actinobacteria;__Micrococcales;__Microbacteriaceae;__Candidatus_Planktoluna  | 0.28 | 0    | 0.23 | 1.06 | 0.24 | 72.87 |
| Bacteria;__Proteobacteria;__Betaproteobacteria;Other;Other;Other                                         | 0.64 | 0.45 | 0.23 | 1.14 | 0.24 | 73.12 |
| Eukaryota;__Metazoa;__Cnidaria;__Hydrozoa;__;__                                                          | 0    | 0.33 | 0.22 | 0.66 | 0.24 | 73.36 |
| Eukaryota;__Stramenopiles;__MAST-8;__;__;__                                                              | 0    | 0.29 | 0.21 | 1.22 | 0.23 | 73.59 |
| Bacteria;__Bacteroidetes;__Cytophagia;__Cytophagales;__Flammeovirgaceae;Other                            | 0    | 0.27 | 0.21 | 1.89 | 0.23 | 73.81 |
| Bacteria;__Bacteroidetes;__Sphingobacteriia;__Sphingobacteriales;__Chitinophagaceae;__g                  | 0.28 | 0    | 0.2  | 1.17 | 0.22 | 74.04 |
| Bacteria;__Bacteroidetes;__Bacteroidia;__Bacteroidales;__Bacteroidaceae;__Bacteroides                    | 0.31 | 0.04 | 0.2  | 1.01 | 0.22 | 74.25 |
| Eukaryota;__Stramenopiles;__Chrysophyceae;__Chromulinales;__Phaeoplaca;__                                | 0.26 | 0    | 0.2  | 6.07 | 0.21 | 74.47 |
| Bacteria;__Proteobacteria;__Gammaproteobacteria;__Oceanospirillales;__oc58;__g                           | 0.27 | 0    | 0.2  | 1.31 | 0.21 | 74.68 |
| Bacteria;__Proteobacteria;__Alphaproteobacteria;__Sphingomonadales;__Sphingomonadaceae;__Sphingopyxis    | 0    | 0.26 | 0.2  | 3.59 | 0.21 | 74.89 |
| Eukaryota;__Haptophyta;__Prymnesiophyceae;__Prymnesiales;Other;Other                                     | 0    | 0.27 | 0.2  | 1.32 | 0.21 | 75.11 |
| Bacteria;__Proteobacteria;__Gammaproteobacteria;__Oceanospirillales;__Oceanospirillaceae;__Balneatrix    | 0    | 0.25 | 0.19 | 1.6  | 0.21 | 75.32 |
| Bacteria;__Proteobacteria;__Alphaproteobacteria;__Rhodospirillales;__Rhodospirillaceae;__Defluviicoccus  | 0    | 0.25 | 0.19 | 2.64 | 0.21 | 75.53 |
| Bacteria;__Proteobacteria;__Deltaproteobacteria;__Bdellovibrionales;__Bacteriovoracaceae;__Bacteriovorax | 0.24 | 0    | 0.19 | 1.58 | 0.21 | 75.73 |
| Bacteria;__Proteobacteria;__Betaproteobacteria;__Burkholderiales;__Comamonadaceae;__Hydrogenophaga       | 0.26 | 0    | 0.19 | 1.1  | 0.21 | 75.94 |
| Bacteria;__Bacteroidetes;__Sphingobacteriia;__Sphingobacteriales;__Chitinophagaceae;__Filimonas          | 0.26 | 0    | 0.19 | 1.2  | 0.21 | 76.14 |
| Eukaryota;__Chloroplastida;__Chlorophyceae;__Desmodesmus;__;__                                           | 0.27 | 0.03 | 0.19 | 1.44 | 0.2  | 76.35 |
| Eukaryota;__Alveolata;__Ciliophora;__Conthreep;__Oligohymenophorea;Other                                 | 0.27 | 0.06 | 0.19 | 1.16 | 0.2  | 76.55 |
| Bacteria;__Candidate_division_TM7;__c;__o;__f;__g                                                        | 0.23 | 0    | 0.18 | 1.69 | 0.2  | 76.75 |
| Eukaryota;__Metazoa;__Annelida;__;__;__                                                                  | 0    | 0.27 | 0.18 | 1    | 0.2  | 76.95 |
| Bacteria;__Proteobacteria;__Betaproteobacteria;__Burkholderiales;__Burkholderiaceae;__Ralstonia          | 0.23 | 0    | 0.18 | 1.09 | 0.2  | 77.15 |
| Bacteria;__Verrucomicrobia;__Opitutae;__MB11C04_marine_group;__f;__g                                     | 0    | 0.24 | 0.18 | 2.37 | 0.2  | 77.34 |
| Bacteria;__Bacteroidetes;__Sphingobacteriia;__Sphingobacteriales;__WCHB1-69;__g                          | 0.24 | 0    | 0.17 | 1.18 | 0.19 | 77.53 |
| Bacteria;__Proteobacteria;__Betaproteobacteria;__Rhodocyclales;__Rhodocyclaceae;__Dechloromonas          | 0.23 | 0    | 0.17 | 2.81 | 0.19 | 77.72 |
| Bacteria;__Proteobacteria;__Betaproteobacteria;__Burkholderiales;__Alcaligenaceae;__Pusillimonas         | 0.2  | 0    | 0.17 | 0.66 | 0.19 | 77.9  |
| Eukaryota;__Stramenopiles;__MAST-1;__MAST-1 C;__;__                                                      | 0    | 0.24 | 0.16 | 0.92 | 0.18 | 78.08 |
| Bacteria;__Actinobacteria;__Actinobacteria;__Micrococcales;__Microbacteriaceae;__Alpinimonas             | 0.19 | 0    | 0.16 | 0.66 | 0.18 | 78.26 |
| Eukaryota;__Chloroplastida;__Chlorophyceae;__;__;__                                                      | 0.22 | 0    | 0.16 | 1.16 | 0.17 | 78.43 |



|                                                                                                                               |      |      |      |      |      |       |
|-------------------------------------------------------------------------------------------------------------------------------|------|------|------|------|------|-------|
| Archaea;__Euryarchaeota;__Halobacteria;__Halobacteriales;__Deep_Sea_Hydrothermal_Vent_Gp_6(DHVEG-6);__Candidatus_Parvarchaeum | 0.19 | 0    | 0.16 | 0.87 | 0.17 | 78.6  |
| Bacteria;__Candidate_division_OD1;__c;__o;__f;__g                                                                             | 0.2  | 0    | 0.16 | 1.66 | 0.17 | 78.77 |
| Eukaryota;__Alveolata;__Ciliophora;__Conthreep;__Prostomatea;__Cryptocaryon                                                   | 0.26 | 0.09 | 0.16 | 1.69 | 0.17 | 78.94 |
| Eukaryota;__Alveolata;__Ciliophora;__Spirotrichea;__Choreotrichia;Other                                                       | 0    | 0.22 | 0.15 | 0.94 | 0.17 | 79.11 |
| Bacteria;__Proteobacteria;__Alphaproteobacteria;__Rhodospirillales;__Rhodospirillaceae;__g                                    | 0    | 0.2  | 0.15 | 6.14 | 0.17 | 79.27 |
| Bacteria;__WCHB1-60;__c;__o;__f;__g                                                                                           | 0.18 | 0    | 0.15 | 0.76 | 0.17 | 79.44 |
| Eukaryota;__Telonema;__Incertae_Sedis;__;__;                                                                                  | 0    | 0.23 | 0.15 | 0.66 | 0.17 | 79.61 |
| Bacteria;__Proteobacteria;__Gammaproteobacteria;__Xanthomonadales;__Xanthomonadaceae;Other                                    | 0.21 | 0    | 0.15 | 1.13 | 0.17 | 79.77 |
| Eukaryota;__Chloroplastida;__Prasinophytae;__Pyramimonas;__;__                                                                | 0    | 0.22 | 0.15 | 0.85 | 0.17 | 79.94 |
| Bacteria;__Proteobacteria;__Gammaproteobacteria;__Order_Incertae_Sedis;__Family_Incertae_Sedis;__Marinicella                  | 0    | 0.18 | 0.15 | 0.86 | 0.16 | 80.1  |

#### Groups Seal Pool & Atlas Cove

Average dissimilarity = 92.34

| Species                                                                                                | Seal Pool | Atlas Cove | Av.Diss | Diss/SD | Contrib% | Cum.% |
|--------------------------------------------------------------------------------------------------------|-----------|------------|---------|---------|----------|-------|
|                                                                                                        | Av.Abund  | Av.Abund   |         |         |          |       |
| Bacteria;__Actinobacteria;__Actinobacteria;__PeM15;__f;__g                                             | 3.86      | 0.08       | 2.79    | 1.61    | 3.02     | 3.02  |
| Bacteria;__Proteobacteria;__Gammaproteobacteria;__Oceanospirillales;__ZD0405;__g                       | 0.08      | 3.19       | 2.37    | 1.94    | 2.57     | 5.59  |
| Bacteria;__Bacteroidetes;__Flavobacteria;__Flavobacteriales;__Flavobacteriaceae;__Flavobacterium       | 3.15      | 0.03       | 2.25    | 1.9     | 2.44     | 8.03  |
| Bacteria;__Proteobacteria;__Gammaproteobacteria;Other;Other;Other                                      | 0.2       | 3.15       | 2.15    | 2.67    | 2.33     | 10.36 |
| Bacteria;__Proteobacteria;__Alphaproteobacteria;__SAR11_clade;__Surface_1;__g                          | 0.06      | 2.82       | 2.12    | 1.36    | 2.3      | 12.65 |
| Bacteria;__Proteobacteria;__Betaproteobacteria;__Burkholderiales;__Comamonadaceae;Other                | 2.78      | 0.03       | 1.99    | 2.4     | 2.15     | 14.8  |
| Bacteria;__Proteobacteria;__Betaproteobacteria;__Burkholderiales;__Burkholderiaceae;__Polynucleobacter | 2.03      | 0          | 1.52    | 1.17    | 1.64     | 16.45 |
| Bacteria;__Proteobacteria;__Gammaproteobacteria;__Alteromonadales;__Alteromonadaceae;__SAR92_clade     | 0.07      | 2.09       | 1.47    | 2.33    | 1.6      | 18.04 |
| Bacteria;__Proteobacteria;__Gammaproteobacteria;__Oceanospirillales;__SAR86_clade;__g                  | 0.06      | 1.99       | 1.45    | 2.36    | 1.57     | 19.61 |
| Bacteria;__Proteobacteria;__Betaproteobacteria;__Burkholderiales;__Comamonadaceae;__Polaromonas        | 2         | 0          | 1.45    | 2.22    | 1.56     | 21.18 |
| Bacteria;__Bacteroidetes;__Flavobacteria;__Flavobacteriales;__Flavobacteriaceae;__NS2b_marine_group    | 0.09      | 1.92       | 1.35    | 3.9     | 1.46     | 22.64 |
| Bacteria;__Cyanobacteria;__Chloroplast;__Chloroplast;__Chloroplast;__Chloroplast                       | 0.84      | 2.38       | 1.29    | 1.48    | 1.4      | 24.04 |
| Bacteria;__Bacteroidetes;__Flavobacteria;__Flavobacteriales;__Flavobacteriaceae;__Polaribacter         | 0.06      | 1.7        | 1.19    | 4.15    | 1.29     | 25.33 |
| Bacteria;__Proteobacteria;__Alphaproteobacteria;__Rhodobacterales;__Rhodobacteraceae;Other             | 1.79      | 0.29       | 1.16    | 1.29    | 1.26     | 26.59 |

|                                                                                                                           |      |      |      |      |      |       |
|---------------------------------------------------------------------------------------------------------------------------|------|------|------|------|------|-------|
| Bacteria;__Proteobacteria;__Alphaproteobacteria;__Rhodobacterales;__Rhodobacteraceae;__Roseobacter_clade_DC5-80-3_lineage | 0.07 | 1.59 | 1.14 | 2.76 | 1.23 | 27.82 |
| Bacteria;__Bacteroidetes;__Flavobacteria;__Flavobacteriales;__Flavobacteriaceae;__NS4_marine_group                        | 0.05 | 1.31 | 0.97 | 1.83 | 1.05 | 28.87 |
| Bacteria;__Bacteroidetes;__Flavobacteria;__Flavobacteriales;__NS9_marine_group;__g                                        | 0.21 | 1.54 | 0.96 | 7.17 | 1.04 | 29.92 |
| Archaea;__Euryarchaeota;__Thermoplasmata;__Thermoplasmatales;__Marine_Group_II;__g                                        | 0.05 | 1.28 | 0.94 | 1.91 | 1.02 | 30.94 |
| Bacteria;__Actinobacteria;__Actinobacteria;__Frankiales;__Sporichthyaceae;__hgcl_clade                                    | 1.22 | 0    | 0.91 | 1.07 | 0.99 | 31.92 |
| Bacteria;__Proteobacteria;__Betaproteobacteria;__Burkholderiales;__Comamonadaceae;__Simplicispira                         | 1.25 | 0    | 0.9  | 1.65 | 0.97 | 32.89 |
| Bacteria;__Actinobacteria;__Actinobacteria;__Micrococcales;__Microbacteriaceae;Other                                      | 1.18 | 0    | 0.88 | 1.34 | 0.95 | 33.85 |
| Bacteria;__Bacteroidetes;__Sphingobacteriia;__Sphingobacteriales;__Chitinophagaceae;__Sediminibacterium                   | 1.15 | 0    | 0.83 | 2.48 | 0.9  | 34.75 |
| Bacteria;__Proteobacteria;__Betaproteobacteria;__Burkholderiales;__Comamonadaceae;__g                                     | 1.15 | 0    | 0.83 | 1.37 | 0.9  | 35.65 |
| Bacteria;__Bacteroidetes;__Sphingobacteriia;__Sphingobacteriales;__NS11-12_marine_group;__g                               | 1.14 | 0    | 0.82 | 1.42 | 0.88 | 36.53 |
| Bacteria;__Bacteroidetes;__Sphingobacteriia;__Sphingobacteriales;__Sphingobacteriaceae;__Pedobacter                       | 1.06 | 0    | 0.78 | 1.93 | 0.84 | 37.37 |
| Bacteria;__Proteobacteria;__Gammaproteobacteria;__Alteromonadales;__Pseudoalteromonadaceae;__Pseudoalteromonas            | 0.06 | 1.18 | 0.77 | 1.49 | 0.83 | 38.2  |
| Bacteria;__Actinobacteria;__Actinobacteria;__Frankiales;__Sporichthyaceae;Other                                           | 1.02 | 0    | 0.76 | 1.05 | 0.82 | 39.03 |
| Bacteria;__Proteobacteria;__Gammaproteobacteria;__Alteromonadales;__Alteromonadaceae;__Alteromonas                        | 0    | 1.1  | 0.75 | 1.33 | 0.81 | 39.84 |
| Bacteria;__Bacteroidetes;__Flavobacteria;__Flavobacteriales;__Flavobacteriaceae;Other                                     | 0.05 | 1.01 | 0.73 | 1.64 | 0.79 | 40.63 |
| Eukaryota;__Chloroplastida;__Chlorophyceae;__Desmodesmus;__;__                                                            | 1.02 | 0.03 | 0.72 | 1.08 | 0.78 | 41.41 |
| Bacteria;__Proteobacteria;__Betaproteobacteria;__Burkholderiales;__Comamonadaceae;__Paucibacter                           | 0.97 | 0    | 0.7  | 1.22 | 0.75 | 42.16 |
| Eukaryota;__Stramenopiles;__MAST-1;__MAST-1 B;__;__                                                                       | 0    | 1    | 0.69 | 1.31 | 0.74 | 42.9  |
| Eukaryota;__Rhizaria;__Cercozoa;__Thecofilosea;Other;Other                                                                | 1.1  | 0.19 | 0.68 | 1.49 | 0.74 | 43.64 |
| Bacteria;__Proteobacteria;__Alphaproteobacteria;__SAR11_clade;Other;Other                                                 | 0.05 | 0.9  | 0.65 | 1.62 | 0.71 | 44.35 |
| Eukaryota;Other;Other;Other;Other;Other                                                                                   | 0    | 0.97 | 0.64 | 0.89 | 0.69 | 45.04 |
| Bacteria;__Proteobacteria;__Alphaproteobacteria;__Rhodobacterales;__Rhodobacteraceae;__g                                  | 0    | 0.85 | 0.62 | 2.21 | 0.67 | 45.71 |
| Bacteria;__Bacteroidetes;__Sphingobacteriia;__Sphingobacteriales;__Chitinophagaceae;__Ferruginibacter                     | 0.86 | 0    | 0.62 | 1.51 | 0.67 | 46.38 |
| Bacteria;__Bacteroidetes;__Flavobacteria;__Flavobacteriales;Other;Other                                                   | 0    | 0.84 | 0.59 | 2.36 | 0.64 | 47.02 |
| Eukaryota;__Haptophyta;__Prymnesiophyceae;Other;Other;Other                                                               | 0    | 0.86 | 0.58 | 1.33 | 0.63 | 47.65 |
| Bacteria;__Actinobacteria;Other;Other;Other;Other                                                                         | 0.78 | 0    | 0.58 | 1.66 | 0.63 | 48.28 |
| Bacteria;__Proteobacteria;__Betaproteobacteria;__Burkholderiales;__Comamonadaceae;__Albidiferax                           | 0.77 | 0    | 0.55 | 1.46 | 0.6  | 48.87 |
| Bacteria;__Bacteroidetes;__Sphingobacteriia;__Sphingobacteriales;__Saprospiraceae;__g                                     | 0.76 | 0    | 0.55 | 0.95 | 0.59 | 49.46 |
| Bacteria;__Candidate_division_OP11;__c;__o;__f;__g                                                                        | 0.72 | 0    | 0.54 | 1.19 | 0.59 | 50.05 |
| Bacteria;__Bacteroidetes;__Sphingobacteriia;__Sphingobacteriales;__Chitinophagaceae;__g                                   | 0.71 | 0    | 0.52 | 1.25 | 0.56 | 50.61 |
| Bacteria;__Proteobacteria;__Alphaproteobacteria;__Rhodospirillales;__Acetobacteraceae;__Roseococcus                       | 0.71 | 0    | 0.51 | 1.37 | 0.55 | 51.16 |
| Eukaryota;__Metazoa;__Arthropoda;__Maxillopoda;__;__                                                                      | 0    | 0.78 | 0.51 | 0.81 | 0.55 | 51.71 |

|                                                                                                           |      |      |      |      |      |       |
|-----------------------------------------------------------------------------------------------------------|------|------|------|------|------|-------|
| Bacteria;__Bacteroidetes;__Flavobacteria;__Flavobacteriales;__Cryomorphaceae;__Fluviicola                 | 0.9  | 0.2  | 0.51 | 2.21 | 0.55 | 52.26 |
| Eukaryota;__Alveolata;__Dinoflagellata;__Dinophyceae;__Gymnodiniphyceidae;__Gyrodinium                    | 0    | 0.77 | 0.5  | 0.75 | 0.54 | 52.81 |
| Bacteria;__Proteobacteria;__Alphaproteobacteria;__Rhodobacterales;__Rhodobacteraceae;__Sulfitobacter      | 0    | 0.73 | 0.5  | 1.32 | 0.54 | 53.34 |
| Bacteria;__Proteobacteria;__Betaproteobacteria;__Burkholderiales;__Alcaligenaceae;__Achromobacter         | 0.67 | 0    | 0.5  | 2.41 | 0.54 | 53.88 |
| Archaea;__Thaumarchaeota;__Marine_Group_I;__o;__f;__g                                                     | 0    | 0.65 | 0.49 | 1.54 | 0.53 | 54.42 |
| Bacteria;__Proteobacteria;__Alphaproteobacteria;__Sphingomonadales;__Sphingomonadaceae;__Novosphingobium  | 0.68 | 0    | 0.49 | 2.07 | 0.53 | 54.95 |
| Bacteria;__Proteobacteria;__Betaproteobacteria;__Burkholderiales;__Alcaligenaceae;Other                   | 0.64 | 0    | 0.47 | 2.6  | 0.5  | 55.46 |
| Bacteria;__Bacteroidetes;__Flavobacteria;__Flavobacteriales;__Flavobacteriaceae;__NS5_marine_group        | 0    | 0.6  | 0.46 | 1.28 | 0.5  | 55.96 |
| Bacteria;__Proteobacteria;__Gammaproteobacteria;__Oceanospirillales;__Oceanospirillaceae;Other            | 0.05 | 0.68 | 0.46 | 3.98 | 0.5  | 56.46 |
| Eukaryota;__Picozoa;__;__;__                                                                              | 0    | 0.68 | 0.46 | 1.29 | 0.49 | 56.95 |
| Bacteria;__Actinobacteria;__Actinobacteria;__Micrococcales;__Microbacteriaceae;__Candidatus_Aquiluna      | 0.62 | 0    | 0.46 | 1.61 | 0.49 | 57.45 |
| Eukaryota;__Fungi;__Chytridiomycota;__;__;__                                                              | 0.63 | 0    | 0.45 | 1.19 | 0.49 | 57.93 |
| Eukaryota;__Alveolata;__Ciliophora;__Spirotrichea;__Oligotrichia;__uncultured                             | 0    | 0.66 | 0.45 | 1.17 | 0.49 | 58.42 |
| Archaea;__Euryarchaeota;__Methanomicrobia;__Methanomicrobiales;__Methanoregulaceae;__Methanoregula        | 0.61 | 0    | 0.45 | 8.52 | 0.48 | 58.91 |
| Bacteria;__Proteobacteria;__Gammaproteobacteria;__Oceanospirillales;__Alcanivoracaceae;__Alcanivorax      | 0.02 | 0.67 | 0.45 | 2.29 | 0.48 | 59.39 |
| Bacteria;__Deferribacteres;__Deferribacteres;__Deferribacterales;__SAR406_clade(Marine_group_A);__g       | 0    | 0.55 | 0.43 | 1.19 | 0.47 | 59.86 |
| Bacteria;__Proteobacteria;__Alphaproteobacteria;__Rickettsiales;__SAR116_clade;__g                        | 0    | 0.57 | 0.43 | 2.7  | 0.46 | 60.32 |
| Eukaryota;__Stramenopiles;__MAST-7;__;__;__                                                               | 0    | 0.62 | 0.43 | 1.26 | 0.46 | 60.79 |
| Eukaryota;__Stramenopiles;__MAST-3;__;__;__                                                               | 0    | 0.61 | 0.42 | 1.31 | 0.45 | 61.24 |
| Bacteria;__Proteobacteria;__Gammaproteobacteria;__Alteromonadales;__Colwelliaceae;__Colwellia             | 0    | 0.61 | 0.42 | 1.5  | 0.45 | 61.69 |
| Bacteria;__Proteobacteria;__Gammaproteobacteria;__Pseudomonadales;__Moraxellaceae;__Psychrobacter         | 0.53 | 0    | 0.38 | 1.92 | 0.42 | 62.1  |
| Bacteria;__Proteobacteria;__Betaproteobacteria;__Burkholderiales;Other;Other                              | 0.53 | 0    | 0.38 | 2.58 | 0.41 | 62.52 |
| Bacteria;__Proteobacteria;__Alphaproteobacteria;__SAR11_clade;__Surface_4;__g                             | 0    | 0.49 | 0.37 | 1.68 | 0.4  | 62.92 |
| Bacteria;__Proteobacteria;__Deltaproteobacteria;__Bdellovibrionales;__Bacteriovoracaceae;__Bacteriovorax  | 0.5  | 0    | 0.37 | 4.64 | 0.4  | 63.32 |
| Bacteria;__Actinobacteria;__Acidimicrobiia;__Acidimicrobiales;__Acidimicrobiaceae;__CL500-29_marine_group | 0.49 | 0    | 0.37 | 0.97 | 0.4  | 63.72 |
| Bacteria;__Proteobacteria;__Gammaproteobacteria;__Oceanospirillales;__OM182_clade;__g                     | 0.05 | 0.55 | 0.37 | 1.99 | 0.4  | 64.11 |
| Bacteria;__Bacteroidetes;__Cytophagia;__Cytophagales;__Cytophagaceae;__Leadbetterella                     | 0.5  | 0    | 0.36 | 1.12 | 0.39 | 64.5  |
| Bacteria;__Bacteroidetes;__Flavobacteria;__Flavobacteriales;__Cryomorphaceae;__Owenweeksia                | 0    | 0.47 | 0.36 | 2.34 | 0.39 | 64.89 |

|                                                                                                         |      |      |      |      |      |       |
|---------------------------------------------------------------------------------------------------------|------|------|------|------|------|-------|
| Bacteria;__Proteobacteria;__Gammaproteobacteria;__Pseudomonadales;__Moraxellaceae;__Perlucidibaca       | 0.76 | 0.49 | 0.35 | 1.56 | 0.38 | 65.27 |
| Eukaryota;__Alveolata;__Protalveolata;__Syndiniales;__Syndiniales Group I;__                            | 0    | 0.48 | 0.33 | 1.31 | 0.35 | 65.62 |
| Bacteria;__Bacteroidetes;__Sphingobacteriia;__Sphingobacteriales;__WCHB1-69;__g                         | 0.44 | 0    | 0.32 | 1.13 | 0.34 | 65.96 |
| Bacteria;__Candidate_division_TM7;__c;__o;__f;__g                                                       | 0.41 | 0    | 0.31 | 0.84 | 0.34 | 66.3  |
| Archaea;__Euryarchaeota;__Halobacteria;__Halobacteriales;__Deep_Sea_Hydrothermal_Vent_Gp_6(DHVEG-6);__g | 0.41 | 0    | 0.31 | 0.93 | 0.34 | 66.63 |
| Eukaryota;__Alveolata;__Ciliophora;__Spirotrichea;__Oligotrichia;__Strombidium                          | 0    | 0.47 | 0.31 | 0.84 | 0.33 | 66.97 |
| Bacteria;__Bacteroidetes;__Sphingobacteriia;__Sphingobacteriales;__Chitinophagaceae;__Filimonas         | 0.42 | 0    | 0.3  | 0.94 | 0.33 | 67.29 |
| Bacteria;__Actinobacteria;__Acidimicrobiia;__Acidimicrobiales;__uncultured;__g                          | 0.41 | 0    | 0.3  | 2.77 | 0.33 | 67.62 |
| Bacteria;__Proteobacteria;__Gammaproteobacteria;__Alteromonadales;__Alteromonadaceae;Other              | 0.02 | 0.45 | 0.3  | 3.27 | 0.33 | 67.95 |
| Eukaryota;__Holozoa;__Choanomonada;__Acanthoecida;__Diaphanoeca;__                                      | 0    | 0.45 | 0.3  | 0.94 | 0.32 | 68.27 |
| Bacteria;__Proteobacteria;__Alphaproteobacteria;Other;Other;Other                                       | 0.02 | 0.42 | 0.3  | 1.72 | 0.32 | 68.59 |
| Bacteria;__Proteobacteria;__Gammaproteobacteria;__Oceanospirillales;__oc58;__g                          | 0.39 | 0    | 0.28 | 2.09 | 0.31 | 68.9  |
| Eukaryota;__Alveolata;__Protalveolata;__Syndiniales;__Syndiniales Group II;__                           | 0    | 0.41 | 0.28 | 1.29 | 0.3  | 69.2  |
| Bacteria;__WCHB1-60;__c;__o;__f;__g                                                                     | 0.37 | 0    | 0.28 | 0.79 | 0.3  | 69.5  |
| Bacteria;__Bacteroidetes;__Flavobacteria;__Flavobacteriales;__Flavobacteriaceae;__NS3a_marine_group     | 0    | 0.38 | 0.28 | 7.63 | 0.3  | 69.81 |
| Bacteria;__Bacteroidetes;__Flavobacteria;__Flavobacteriales;__Flavobacteriaceae;__g                     | 0    | 0.39 | 0.28 | 5.57 | 0.3  | 70.11 |
| Unassigned;Other;Other;Other;Other;Other                                                                | 0.91 | 1.01 | 0.27 | 1.09 | 0.3  | 70.4  |
| Bacteria;__Fusobacteria;__Fusobacteria;__Fusobacteriales;__Fusobacteriaceae;__Fusobacterium             | 0.38 | 0    | 0.27 | 1.35 | 0.3  | 70.7  |
| Bacteria;__Proteobacteria;__Deltaproteobacteria;__SAR324_clade(Marine_group_B);__f;__g                  | 0    | 0.35 | 0.27 | 1.32 | 0.29 | 70.99 |
| Bacteria;__Proteobacteria;__Betaproteobacteria;__Burkholderiales;__Comamonadaceae;__Acidovorax          | 0.38 | 0    | 0.27 | 1.31 | 0.29 | 71.29 |
| Eukaryota;__Stramenopiles;__MAST-1;__MAST-1 A;__;                                                       | 0    | 0.4  | 0.27 | 1.32 | 0.29 | 71.58 |
| Bacteria;__Proteobacteria;__Deltaproteobacteria;__Myxococcales;__0319-6G20;__g                          | 0.36 | 0    | 0.26 | 1.57 | 0.29 | 71.86 |
| Bacteria;__Bacteroidetes;__Cytophagia;__Cytophagales;__Flammeovirgaceae;__Marinoscillum                 | 0    | 0.33 | 0.26 | 0.9  | 0.28 | 72.15 |
| Bacteria;__Verrucomicrobia;__Opitutae;__Opitutales;__Opitutaceae;__Opitutus                             | 0.36 | 0    | 0.26 | 1.47 | 0.28 | 72.43 |
| Eukaryota;__Alveolata;__Dinoflagellata;__Dinophyceae;__Gymnodiniphyceidae;__Gymnodinium                 | 0    | 0.39 | 0.26 | 0.94 | 0.28 | 72.71 |
| Bacteria;__Gemmatimonadetes;__Gemmatimonadetes;__Gemmatimonadales;__Gemmatimonadaceae;__Gemmatimonas    | 0.35 | 0    | 0.25 | 1.68 | 0.27 | 72.98 |
| Bacteria;__Proteobacteria;__Alphaproteobacteria;__SAR11_clade;__f;__g                                   | 0    | 0.32 | 0.25 | 1.17 | 0.27 | 73.25 |
| Eukaryota;__Alveolata;__Dinoflagellata;__Dinophyceae;__Gymnodiniphyceidae;Other                         | 0    | 0.38 | 0.25 | 0.77 | 0.27 | 73.51 |
| Bacteria;__Bacteroidetes;__vadinHA17;__o;__f;__g                                                        | 0.34 | 0    | 0.24 | 2.46 | 0.26 | 73.78 |
| Eukaryota;__Alveolata;__Ciliophora;__Spirotrichea;__Choreotrichia;__uncultured                          | 0    | 0.37 | 0.24 | 0.86 | 0.26 | 74.04 |
| Eukaryota;__Chloroplastida;__Mamiellophyceae;__Micromonas;__;                                           | 0    | 0.33 | 0.23 | 1.16 | 0.25 | 74.29 |
| Bacteria;__Proteobacteria;__Gammaproteobacteria;__Oceanospirillales;Other;Other                         | 0    | 0.3  | 0.23 | 2.32 | 0.25 | 74.54 |
| Bacteria;__Candidate_division_OD1;__c;__o;__f;__g                                                       | 0.3  | 0    | 0.23 | 0.66 | 0.25 | 74.79 |

|                                                                                                                               |      |      |      |      |      |       |
|-------------------------------------------------------------------------------------------------------------------------------|------|------|------|------|------|-------|
| Bacteria;__Proteobacteria;__Alphaproteobacteria;__Rhodobacterales;__Rhodobacteraceae;__Rhodobacter                            | 0.32 | 0    | 0.23 | 1.17 | 0.25 | 75.03 |
| Archaea;__Euryarchaeota;__Halobacteria;__Halobacteriales;__Deep_Sea_Hydrothermal_Vent_Gp_6(DHVEG-6);__Candidatus_Parvarchaeum | 0.3  | 0    | 0.22 | 1.06 | 0.24 | 75.27 |
| Eukaryota;__Rhizaria;__Cercozoa;__Thecofilosea;__Cryomonadida;__Cryothecomonas                                                | 0    | 0.34 | 0.22 | 0.88 | 0.24 | 75.51 |
| Eukaryota;__Metazoa;__Cnidaria;__Hydrozoa;__;__                                                                               | 0    | 0.33 | 0.21 | 0.67 | 0.23 | 75.74 |
| Bacteria;__Proteobacteria;__Gammaproteobacteria;__Alteromonadales;__Alteromonadaceae;__BD1-7_clade                            | 0.29 | 0    | 0.21 | 1.5  | 0.22 | 75.97 |
| Bacteria;__Proteobacteria;__Betaproteobacteria;__Burkholderiales;__Comamonadaceae;__Rhizobacter                               | 0.28 | 0    | 0.2  | 2.37 | 0.22 | 76.19 |
| Bacteria;__Proteobacteria;__Betaproteobacteria;__Burkholderiales;__Oxalobacteraceae;__Undibacterium                           | 0.28 | 0    | 0.2  | 3.12 | 0.22 | 76.41 |
| Eukaryota;__Stramenopiles;__MAST-8;__;__;__                                                                                   | 0    | 0.29 | 0.2  | 1.24 | 0.22 | 76.63 |
| Bacteria;__Bacteroidetes;__Cytophagia;__Cytophagales;__Flammeovirgaceae;Other                                                 | 0    | 0.27 | 0.2  | 1.94 | 0.22 | 76.84 |
| Bacteria;__Proteobacteria;__Alphaproteobacteria;__Sphingomonadales;__Sphingomonadaceae;__Sandarakinorhabdus                   | 0.27 | 0    | 0.2  | 1.25 | 0.21 | 77.06 |
| Bacteria;__Proteobacteria;__Betaproteobacteria;__Neisseriales;__Neisseriaceae;__g                                             | 0.27 | 0    | 0.19 | 2.07 | 0.21 | 77.27 |
| Eukaryota;__Fungi;__LKM11;__;__;__                                                                                            | 0.26 | 0    | 0.19 | 2.58 | 0.21 | 77.47 |
| Eukaryota;__Haptophyta;__Prymnesiophyceae;__Prymnesiales;Other;Other                                                          | 0    | 0.27 | 0.19 | 1.33 | 0.2  | 77.67 |
| Bacteria;__Proteobacteria;__Gammaproteobacteria;__Oceanospirillales;__Oceanospirillaceae;__Balneatrix                         | 0    | 0.25 | 0.19 | 1.62 | 0.2  | 77.87 |
| Bacteria;__Proteobacteria;__Alphaproteobacteria;__Rhodospirillales;__Rhodospirillaceae;__Defluviicoccus                       | 0    | 0.25 | 0.18 | 2.79 | 0.2  | 78.07 |
| Bacteria;__Bacteroidetes;__Sphingobacteriia;__Sphingobacteriales;__env.OPS_17;__g                                             | 0.25 | 0    | 0.18 | 1.81 | 0.19 | 78.26 |
| Eukaryota;__Stramenopiles;__T53A1;__;__;__                                                                                    | 0.24 | 0    | 0.18 | 1.77 | 0.19 | 78.46 |
| Eukaryota;__Metazoa;__Annelida;__;__;__                                                                                       | 0    | 0.27 | 0.18 | 1.01 | 0.19 | 78.65 |
| Bacteria;__Firmicutes;__Clostridia;__Clostridiales;__Ruminococcaceae;__g                                                      | 0.24 | 0    | 0.17 | 1.48 | 0.19 | 78.84 |
| Bacteria;__Bacteroidetes;__Bacteroidia;__Bacteroidales;__Prevotellaceae;__Prevotella                                          | 0.24 | 0    | 0.17 | 1.04 | 0.19 | 79.02 |
| Bacteria;__Verrucomicrobia;__Opitutae;__MB11C04_marine_group;__f;__g                                                          | 0    | 0.24 | 0.17 | 2.42 | 0.19 | 79.21 |
| Bacteria;__Proteobacteria;__Alphaproteobacteria;__Sphingomonadales;__Sphingomonadaceae;__Sphingopyxis                         | 0.02 | 0.26 | 0.17 | 2.97 | 0.18 | 79.39 |
| Bacteria;__Firmicutes;__Bacilli;__Bacillales;__Staphylococcaceae;Other                                                        | 0.23 | 0    | 0.17 | 1.33 | 0.18 | 79.57 |
| Eukaryota;__Fungi;Other;Other;Other;Other                                                                                     | 0.23 | 0    | 0.17 | 1.78 | 0.18 | 79.75 |
| Bacteria;__Proteobacteria;__Betaproteobacteria;__Burkholderiales;__Comamonadaceae;__Comamonas                                 | 0.22 | 0    | 0.16 | 1.08 | 0.17 | 79.92 |
| Eukaryota;__Stramenopiles;__Chrysophyceae;Other;Other;Other                                                                   | 0.22 | 0    | 0.16 | 3.25 | 0.17 | 80.1  |

Groups Atlas Pool & Winston Lagoon

Average dissimilarity = 84.87

| Species                                                                                                                       | Atlas Pool | Winston Lagoon | Av.Diss | Diss/SD | Contrib% | Cum.% |
|-------------------------------------------------------------------------------------------------------------------------------|------------|----------------|---------|---------|----------|-------|
|                                                                                                                               | Av.Abund   | Av.Abund       |         |         |          |       |
| Eukaryota;__Alveolata;__Ciliophora;__Spirotrichea;__Hypotrichia;Other                                                         | 3.49       | 0.3            | 2.61    | 2.5     | 3.07     | 3.07  |
| Bacteria;__Cyanobacteria;__Chloroplast;__Chloroplast;__Chloroplast;__Chloroplast                                              | 3.27       | 3.37           | 2.09    | 1.27    | 2.46     | 5.54  |
| Bacteria;__Actinobacteria;__Actinobacteria;__Frankiales;__Sporichthyaceae;__hgcl_clade                                        | 2.32       | 0              | 1.99    | 0.92    | 2.34     | 7.88  |
| Bacteria;__Proteobacteria;__Alphaproteobacteria;__SAR11_clade;__Surface_1;__g                                                 | 0          | 2.12           | 1.75    | 0.77    | 2.06     | 9.94  |
| Eukaryota;__Chloroplastida;__Chlorophyceae;__Chlamydomonas;__;__                                                              | 2.25       | 0              | 1.7     | 1.66    | 2        | 11.94 |
| Bacteria;__Bacteroidetes;__Flavobacteria;__Flavobacteriales;__Flavobacteriaceae;__Flavobacterium                              | 2.2        | 0              | 1.7     | 2.47    | 2        | 13.94 |
| Bacteria;__Bacteroidetes;__Flavobacteria;__Flavobacteriales;__Flavobacteriaceae;Other                                         | 0.03       | 2.34           | 1.68    | 0.96    | 1.98     | 15.92 |
| Bacteria;__Actinobacteria;__Actinobacteria;__Micrococcales;__Microbacteriaceae;Other                                          | 1.99       | 0              | 1.66    | 1.17    | 1.96     | 17.88 |
| Bacteria;__Proteobacteria;__Betaproteobacteria;__Burkholderiales;__Comamonadaceae;Other                                       | 2.66       | 1.03           | 1.62    | 1.53    | 1.91     | 19.79 |
| Bacteria;__Proteobacteria;__Alphaproteobacteria;__Sphingomonadales;__Sphingomonadaceae;__Sphingopyxis                         | 0          | 1.75           | 1.5     | 0.78    | 1.77     | 21.56 |
| Bacteria;__Proteobacteria;__Betaproteobacteria;__Burkholderiales;__Burkholderiaceae;__Polynucleobacter                        | 1.75       | 0              | 1.48    | 1.06    | 1.74     | 23.3  |
| Eukaryota;__Chloroplastida;__Chlorophyceae;Other;Other;Other                                                                  | 1.85       | 0.04           | 1.36    | 1.45    | 1.6      | 24.9  |
| Archaea;__Thaumarchaeota;__Marine_Group_I;__o;__f;__g                                                                         | 0          | 1.55           | 1.27    | 0.93    | 1.5      | 26.39 |
| Bacteria;__Proteobacteria;__Gammaproteobacteria;__Oceanospirillales;__SAR86_clade;__g                                         | 0          | 1.39           | 1.14    | 1.02    | 1.34     | 27.74 |
| Bacteria;__Proteobacteria;__Gammaproteobacteria;__Oceanospirillales;__ZD0405;__g                                              | 0          | 1.34           | 1.1     | 1.01    | 1.3      | 29.03 |
| Bacteria;__Proteobacteria;__Alphaproteobacteria;__Rhodobacterales;__Rhodobacteraceae;Other                                    | 1.03       | 1.87           | 1.04    | 1.69    | 1.23     | 30.26 |
| Bacteria;__Proteobacteria;__Gammaproteobacteria;__Alteromonadales;__Pseudoalteromonadaceae;__g                                | 0          | 1.15           | 0.88    | 1.65    | 1.03     | 31.3  |
| Bacteria;__Proteobacteria;__Betaproteobacteria;__Burkholderiales;__Alcaligenaceae;__Achromobacter                             | 1.09       | 0              | 0.87    | 2.19    | 1.03     | 32.32 |
| Bacteria;__Actinobacteria;__Actinobacteria;__Frankiales;__Sporichthyaceae;Other                                               | 1.02       | 0              | 0.87    | 0.94    | 1.03     | 33.35 |
| Bacteria;__Proteobacteria;__Betaproteobacteria;__Burkholderiales;__Comamonadaceae;__Polaromonas                               | 1.23       | 0.11           | 0.86    | 1.78    | 1.02     | 34.37 |
| Eukaryota;__Rhizaria;__Cercozoa;__Endomyxa;__Novel Clade 10;__                                                                | 1.09       | 0              | 0.84    | 2.1     | 0.99     | 35.36 |
| Archaea;__Euryarchaeota;__Halobacteria;__Halobacteriales;__Deep_Sea_Hydrothermal_Vent_Gp_6(DHVEG-6);__Candidatus_Parvarchaeum | 0.19       | 1.11           | 0.82    | 0.82    | 0.97     | 36.33 |
| Bacteria;__Bacteroidetes;__Flavobacteria;__Flavobacteriales;__Flavobacteriaceae;__NS3a_marine_group                           | 0          | 0.9            | 0.76    | 0.89    | 0.9      | 37.23 |
| Bacteria;__Actinobacteria;__Actinobacteria;__Corynebacteriales;__Nocardiaceae;__Rhodococcus                                   | 0          | 0.96           | 0.71    | 1.1     | 0.84     | 38.07 |
| Bacteria;__Proteobacteria;__Gammaproteobacteria;__Alteromonadales;__Colwelliaceae;__Colwellia                                 | 0.05       | 0.95           | 0.7     | 1.61    | 0.82     | 38.89 |
| Bacteria;__Proteobacteria;__Betaproteobacteria;__Burkholderiales;__Comamonadaceae;__Simplicispira                             | 0.91       | 0              | 0.69    | 1.98    | 0.81     | 39.7  |
| Bacteria;__Bacteroidetes;__Flavobacteria;__Flavobacteriales;__Flavobacteriaceae;__Polaribacter                                | 0          | 0.91           | 0.68    | 1.26    | 0.8      | 40.5  |
| Eukaryota;__Chloroplastida;__Mamiellophyceae;__Micromonas;__;__                                                               | 0          | 0.8            | 0.68    | 0.93    | 0.8      | 41.3  |

|                                                                                                                           |      |      |      |      |      |       |
|---------------------------------------------------------------------------------------------------------------------------|------|------|------|------|------|-------|
| Bacteria;__Proteobacteria;__Alphaproteobacteria;__Rhodobacterales;__Rhodobacteraceae;__g                                  | 0.03 | 0.89 | 0.65 | 1.34 | 0.76 | 42.06 |
| Bacteria;__Actinobacteria;__Actinobacteria;__PeM15;__f;__g                                                                | 0.79 | 0.04 | 0.63 | 1.16 | 0.74 | 42.8  |
| Eukaryota;__Fungi;__Chytridiomycota;__;__;                                                                                | 0.86 | 0.11 | 0.56 | 1.48 | 0.66 | 43.46 |
| Archaea;__Euryarchaeota;__Halobacteria;__Halobacteriales;__Deep_Sea_Hydrothermal_Vent_Gp_6(DHVEG-6);__g                   | 0.29 | 0.68 | 0.56 | 1.03 | 0.66 | 44.12 |
| Eukaryota;__Alveolata;__Ciliophora;__Conthreep;__Phyllopharyngea;__AT1-2                                                  | 0    | 0.75 | 0.55 | 0.9  | 0.64 | 44.76 |
| Bacteria;__Proteobacteria;__Alphaproteobacteria;__SAR11_clade;Other;Other                                                 | 0    | 0.61 | 0.51 | 0.78 | 0.6  | 45.36 |
| Bacteria;__Bacteroidetes;__Flavobacteria;__Flavobacteriales;__Flavobacteriaceae;__g                                       | 0.03 | 0.68 | 0.49 | 0.9  | 0.58 | 45.94 |
| Bacteria;__Candidate_division_OP11;__c;__o;__f;__g                                                                        | 0.55 | 0.19 | 0.46 | 1.01 | 0.54 | 46.48 |
| Bacteria;__Actinobacteria;__Acidimicrobia;__Acidimicrobiales;__Acidimicrobiaceae;__g                                      | 0.04 | 0.54 | 0.46 | 0.73 | 0.54 | 47.02 |
| Bacteria;__Proteobacteria;__Alphaproteobacteria;__Rhodobacterales;__Rhodobacteraceae;__Roseobacter_clade_DC5-80-3_lineage | 0    | 0.55 | 0.45 | 2.79 | 0.53 | 47.55 |
| Eukaryota;__Rhizaria;__Cercozoa;__Endomyxa;__Phytomyxea;__Spongospora                                                     | 0.59 | 0    | 0.45 | 2.47 | 0.53 | 48.08 |
| Bacteria;__Actinobacteria;__Actinobacteria;__Micrococcales;__Microbacteriaceae;__Candidatus_Aquiluna                      | 0.53 | 0    | 0.44 | 1.41 | 0.52 | 48.6  |
| Bacteria;__Proteobacteria;__Betaproteobacteria;__Burkholderiales;__Comamonadaceae;__Paucibacter                           | 0.61 | 0.04 | 0.44 | 1.66 | 0.51 | 49.11 |
| Eukaryota;__Stramenopiles;__Diatomea;__Bacillariophytina;__Mediophyceae;Other                                             | 0.58 | 0    | 0.43 | 1.32 | 0.51 | 49.62 |
| Eukaryota;__Alveolata;__Ciliophora;__Conthreep;__Phyllopharyngea;__Dysteria                                               | 0    | 0.59 | 0.42 | 0.78 | 0.5  | 50.12 |
| Bacteria;__Proteobacteria;__Deltaproteobacteria;__Bdellovibrionales;__Bacteriovoraceae;__Peredibacter                     | 0.05 | 0.59 | 0.42 | 1.47 | 0.5  | 50.62 |
| Bacteria;__Candidate_division_OD1;__c;__o;__f;__g                                                                         | 0.2  | 0.56 | 0.42 | 0.9  | 0.49 | 51.11 |
| Bacteria;__Proteobacteria;__Betaproteobacteria;Other;Other;Other                                                          | 0.64 | 0.68 | 0.41 | 1.49 | 0.48 | 51.59 |
| Bacteria;__Proteobacteria;__Betaproteobacteria;__Burkholderiales;__Alcaligenaceae;Other                                   | 0.57 | 0.07 | 0.39 | 1.84 | 0.46 | 52.05 |
| Bacteria;__Actinobacteria;__Actinobacteria;__Micrococcales;__Microbacteriaceae;__Candidatus_Limnoluna                     | 0.45 | 0    | 0.38 | 1.19 | 0.44 | 52.49 |
| Bacteria;__Bacteroidetes;__Sphingobacterii;__Sphingobacteriales;__Saprospiraceae;__Lewinella                              | 0    | 0.48 | 0.36 | 1.08 | 0.42 | 52.91 |
| Unassigned;Other;Other;Other;Other;Other                                                                                  | 1.1  | 1.43 | 0.35 | 1.48 | 0.42 | 53.33 |
| Bacteria;__Proteobacteria;__Betaproteobacteria;__Burkholderiales;__Comamonadaceae;__g                                     | 0.45 | 0.04 | 0.34 | 1.31 | 0.4  | 53.73 |
| Bacteria;__Bacteroidetes;__Flavobacteria;__Flavobacteriales;__Flavobacteriaceae;__NS2b_marine_group                       | 0    | 0.42 | 0.34 | 7.52 | 0.4  | 54.12 |
| Bacteria;__Proteobacteria;__Betaproteobacteria;__Burkholderiales;Other;Other                                              | 0.38 | 0    | 0.32 | 0.98 | 0.38 | 54.5  |
| Eukaryota;__Chloroplastida;__Trebouxiophyceae;__;__;                                                                      | 0.4  | 0    | 0.31 | 2.01 | 0.36 | 54.87 |
| Bacteria;__Proteobacteria;__Gammaproteobacteria;__Pseudomonadales;__Moraxellaceae;__Psychrobacter                         | 0.5  | 0.16 | 0.31 | 1.53 | 0.36 | 55.23 |
| Archaea;__Euryarchaeota;__Thermoplasmata;__Thermoplasmatales;__Marine_Group_II;__g                                        | 0    | 0.37 | 0.3  | 2.66 | 0.35 | 55.58 |
| Bacteria;__Proteobacteria;__Gammaproteobacteria;__Xanthomonadales;__Xanthomonadaceae;__Arenimonas                         | 0.38 | 0    | 0.3  | 2.12 | 0.35 | 55.93 |
| Bacteria;__Proteobacteria;__Alphaproteobacteria;__SAR11_clade;__Surface_4;__g                                             | 0    | 0.36 | 0.3  | 0.66 | 0.35 | 56.28 |

|                                                                                                         |      |      |      |      |      |       |
|---------------------------------------------------------------------------------------------------------|------|------|------|------|------|-------|
| Bacteria;__Bacteroidetes;__Flavobacteria;__Flavobacteriales;__Flavobacteriaceae;__NS4_marine_group      | 0    | 0.36 | 0.29 | 2.95 | 0.34 | 56.62 |
| Bacteria;__Proteobacteria;__Gammaproteobacteria;__Alteromonadales;__Alteromonadaceae;__SAR92_clade      | 0    | 0.35 | 0.29 | 2.7  | 0.34 | 56.96 |
| Bacteria;__Bacteroidetes;__Sphingobacteriia;__Sphingobacteriales;__NS11-12_marine_group;__g             | 0.41 | 0.35 | 0.29 | 1.4  | 0.34 | 57.3  |
| Eukaryota;__Stramenopiles;__T53A1;__;__;__                                                              | 0.37 | 0    | 0.29 | 1.98 | 0.34 | 57.64 |
| Bacteria;__Proteobacteria;__Gammaproteobacteria;__Oceanospirillales;__Oceanospirillaceae;Other          | 0    | 0.36 | 0.28 | 2.73 | 0.33 | 57.97 |
| Bacteria;__Proteobacteria;__Alphaproteobacteria;__Rhodobacterales;__Rhodobacteraceae;__Loktanella       | 0    | 0.36 | 0.28 | 1.29 | 0.33 | 58.3  |
| Eukaryota;__Stramenopiles;__Bicosoecida;__Siluaniiidae;__Siluania;__                                    | 0.36 | 0    | 0.28 | 1.78 | 0.33 | 58.63 |
| Bacteria;__Proteobacteria;__Betaproteobacteria;__Burkholderiales;__Oxalobacteraceae;__Undibacterium     | 0.36 | 0    | 0.27 | 1.75 | 0.32 | 58.95 |
| Bacteria;__Proteobacteria;__Gammaproteobacteria;__Alteromonadales;__Alteromonadaceae;__Glaciecola       | 0    | 0.36 | 0.27 | 1.02 | 0.31 | 59.26 |
| Bacteria;__Bacteroidetes;__Flavobacteria;__Flavobacteriales;__Flavobacteriaceae;__NS5_marine_group      | 0    | 0.32 | 0.26 | 1.33 | 0.31 | 59.57 |
| Bacteria;__Bacteroidetes;__Sphingobacteriia;__Sphingobacteriales;__Saprospiraceae;__g                   | 0.07 | 0.34 | 0.26 | 0.83 | 0.31 | 59.88 |
| Eukaryota;__Alveolata;__Ciliophora;__Spirotrichea;__Hypotrichia;__Gonostomum                            | 0.29 | 0    | 0.26 | 0.66 | 0.3  | 60.18 |
| Eukaryota;__Alveolata;__Protalveolata;__Colpodellida;Other;Other                                        | 0.33 | 0    | 0.25 | 1.25 | 0.29 | 60.47 |
| Bacteria;__Bacteroidetes;__Flavobacteria;__Flavobacteriales;__Cryomorpaceae;__Owenweeksia               | 0.07 | 0.39 | 0.25 | 1.7  | 0.29 | 60.76 |
| Bacteria;__Proteobacteria;__Gammaproteobacteria;__Enterobacteriales;__Enterobacteriaceae;Other          | 0.07 | 0.37 | 0.25 | 1.21 | 0.29 | 61.05 |
| Bacteria;__Proteobacteria;__Gammaproteobacteria;Other;Other;Other                                       | 0.09 | 0.38 | 0.24 | 1.71 | 0.29 | 61.34 |
| Bacteria;__Bacteroidetes;__Bacteroidia;__Bacteroidales;__Bacteroidaceae;__Bacteroides                   | 0.31 | 0.3  | 0.24 | 1.63 | 0.28 | 61.63 |
| Bacteria;__Bacteroidetes;__Flavobacteria;__Flavobacteriales;__NS9_marine_group;__g                      | 0.09 | 0.4  | 0.24 | 1.22 | 0.28 | 61.91 |
| Bacteria;__Proteobacteria;__Betaproteobacteria;__Burkholderiales;__Comamonadaceae;__Albidiferax         | 0.3  | 0    | 0.24 | 6.99 | 0.28 | 62.19 |
| Bacteria;__Actinobacteria;__Actinobacteria;__Micrococcales;__Microbacteriaceae;__Candidatus_Planktoluna | 0.28 | 0    | 0.23 | 1.07 | 0.28 | 62.46 |
| Bacteria;__Bacteroidetes;__Sphingobacteriia;__Sphingobacteriales;__Saprospiraceae;__Aureispira          | 0    | 0.32 | 0.23 | 0.82 | 0.27 | 62.74 |
| Eukaryota;__Alveolata;__Ciliophora;__Spirotrichea;__Hypotrichia;__                                      | 0    | 0.31 | 0.23 | 1.57 | 0.27 | 63.01 |
| Bacteria;__Proteobacteria;__Gammaproteobacteria;__BD7-8_marine_group;__f;__g                            | 0    | 0.29 | 0.23 | 1.17 | 0.27 | 63.28 |
| Eukaryota;__Chloroplastida;__Ulvophyceae;Other;Other;Other                                              | 0    | 0.31 | 0.23 | 1.11 | 0.27 | 63.55 |
| Bacteria;__Fusobacteria;__Fusobacteria;__Fusobacteriales;__Fusobacteriaceae;__Fusobacterium             | 0.36 | 0.36 | 0.23 | 1.3  | 0.27 | 63.81 |
| Bacteria;__Proteobacteria;__Alphaproteobacteria;__Rhodobacterales;__Rhodobacteraceae;__Rhodobacter      | 0.33 | 0.11 | 0.23 | 1.98 | 0.27 | 64.08 |
| Bacteria;__Proteobacteria;__Alphaproteobacteria;__Rickettsiales;__mitochondria;__g                      | 0.37 | 0.1  | 0.23 | 1.63 | 0.27 | 64.35 |
| Bacteria;__Firmicutes;__Clostridia;__Clostridiales;__Ruminococcaceae;__g                                | 0.35 | 0.21 | 0.22 | 1.35 | 0.26 | 64.61 |
| Bacteria;__Bacteroidetes;__Cytophagia;__Cytophagales;__Flammeovirgaceae;__Reichenbachiella              | 0    | 0.29 | 0.22 | 2.28 | 0.26 | 64.87 |
| Bacteria;__Proteobacteria;__Gammaproteobacteria;__Alteromonadales;__Shewanellaceae;__Shewanella         | 0    | 0.28 | 0.22 | 2.9  | 0.26 | 65.13 |
| Bacteria;__Proteobacteria;__Deltaproteobacteria;__Myxococcales;__0319-6G20;__g                          | 0.41 | 0.15 | 0.22 | 1.37 | 0.26 | 65.39 |
| Bacteria;__Candidate_division_TM7;__c;__o;__f;__g                                                       | 0.23 | 0.19 | 0.22 | 1.99 | 0.26 | 65.65 |



|                                                                                                        |      |      |      |      |      |       |
|--------------------------------------------------------------------------------------------------------|------|------|------|------|------|-------|
| Bacteria;__Proteobacteria;__Alphaproteobacteria;__Kordiimonadales;__Kordiimonadaceae;__Kordiimonas     | 0    | 0.28 | 0.22 | 1.73 | 0.25 | 65.9  |
| Eukaryota;__Alveolata;__Ciliophora;__Spirotrichea;__Oligotrichia;__Strombidium                         | 0    | 0.27 | 0.21 | 2.29 | 0.25 | 66.15 |
| Bacteria;__Proteobacteria;__Gammaproteobacteria;__Pseudomonadales;__Moraxellaceae;__Perlucidibaca      | 0.27 | 0    | 0.21 | 2.09 | 0.24 | 66.4  |
| Eukaryota;__Stramenopiles;__Chrysophyceae;__Chromulinales;__Phaeoplaca;__                              | 0.26 | 0    | 0.2  | 6.58 | 0.24 | 66.64 |
| Bacteria;__Proteobacteria;__Gammaproteobacteria;__Oceanospirillales;__oc58;__g                         | 0.27 | 0    | 0.2  | 1.32 | 0.24 | 66.88 |
| Eukaryota;__Chloroplastida;__Chlorophyceae;__Desmodesmus;__;                                           | 0.27 | 0    | 0.2  | 1.31 | 0.24 | 67.11 |
| Eukaryota;__Alveolata;__Ciliophora;__Spirotrichea;__Oligotrichia;__uncultured                          | 0    | 0.26 | 0.2  | 3.11 | 0.24 | 67.35 |
| Bacteria;__Bacteroidetes;__Sphingobacteriia;__Sphingobacteriales;__Chitinophagaceae;__g                | 0.28 | 0.13 | 0.2  | 1.14 | 0.23 | 67.58 |
| Bacteria;__Proteobacteria;__Deltaproteobacteria;__Bdellovibrionales;__Bacteriovoraceae;__Bacteriovorax | 0.24 | 0    | 0.2  | 1.59 | 0.23 | 67.82 |
| Bacteria;__Proteobacteria;__Alphaproteobacteria;__Rickettsiales;__SAR116_clade;__g                     | 0    | 0.24 | 0.2  | 1.22 | 0.23 | 68.05 |
| Bacteria;__Proteobacteria;__Betaproteobacteria;__Burkholderiales;__Comamonadaceae;__Hydrogenophaga     | 0.26 | 0    | 0.2  | 1.1  | 0.23 | 68.28 |
| Bacteria;__Bacteroidetes;__Sphingobacteriia;__Sphingobacteriales;__Chitinophagaceae;__Filimonas        | 0.26 | 0    | 0.2  | 1.21 | 0.23 | 68.51 |
| Bacteria;__Proteobacteria;__Alphaproteobacteria;__SAR11_clade;__f;__g                                  | 0    | 0.24 | 0.2  | 0.85 | 0.23 | 68.74 |
| Bacteria;__Proteobacteria;__Gammaproteobacteria;__Alteromonadales;Other;Other                          | 0    | 0.24 | 0.19 | 1.87 | 0.23 | 68.97 |
| Bacteria;__Bacteroidetes;__Flavobacteriia;__Flavobacteriales;__Flavobacteriaceae;__Pibocella           | 0    | 0.26 | 0.19 | 0.96 | 0.23 | 69.2  |
| Eukaryota;__Alveolata;__Ciliophora;__Conthreep;__Oligohymenophorea;Other                               | 0.27 | 0.06 | 0.19 | 1.17 | 0.23 | 69.43 |
| Bacteria;__Proteobacteria;__Gammaproteobacteria;__Alteromonadales;__Moritellaceae;__Moritella          | 0    | 0.26 | 0.19 | 1.13 | 0.23 | 69.66 |
| Bacteria;__Proteobacteria;__Gammaproteobacteria;__Alteromonadales;__Alteromonadaceae;Other             | 0    | 0.25 | 0.19 | 3.72 | 0.23 | 69.88 |
| Bacteria;__Bacteroidetes;__Cytophagia;__Cytophagales;__Cytophagaceae;__Leadbetterella                  | 0.14 | 0.18 | 0.19 | 1.41 | 0.22 | 70.1  |
| Bacteria;__Proteobacteria;__Betaproteobacteria;__Burkholderiales;__Burkholderiaceae;__Ralstonia        | 0.23 | 0    | 0.19 | 1.09 | 0.22 | 70.33 |
| Bacteria;__Proteobacteria;__Gammaproteobacteria;__Thiotrichales;__Thiotrichaceae;__Thiothrix           | 0    | 0.23 | 0.19 | 0.66 | 0.22 | 70.55 |
| Eukaryota;__Alveolata;__Protalveolata;__Perkinsidae;__NA2-2D10;__                                      | 0    | 0.23 | 0.18 | 1.16 | 0.22 | 70.76 |
| Bacteria;__Proteobacteria;__Gammaproteobacteria;__Chromatiales;__Granulosicoccaceae;__Granulosicoccus  | 0    | 0.24 | 0.18 | 1.31 | 0.21 | 70.98 |
| Bacteria;__Bacteroidetes;__Sphingobacteriia;__Sphingobacteriales;__WCHB1-69;__g                        | 0.24 | 0    | 0.18 | 1.18 | 0.21 | 71.19 |
| Bacteria;__Proteobacteria;__Betaproteobacteria;__Rhodocyclales;__Rhodocyclaceae;__Dechloromonas        | 0.23 | 0    | 0.18 | 2.87 | 0.21 | 71.4  |
| Bacteria;__Proteobacteria;__Betaproteobacteria;__Burkholderiales;__Alcaligenaceae;__Pusillimonas       | 0.2  | 0    | 0.18 | 0.66 | 0.21 | 71.61 |
| Bacteria;__Proteobacteria;__Alphaproteobacteria;Other;Other;Other                                      | 0    | 0.21 | 0.17 | 0.88 | 0.21 | 71.81 |
| Eukaryota;__Alveolata;__Ciliophora;__Spirotrichea;__Euplotia;__Aspidisca                               | 0.03 | 0.26 | 0.17 | 1.48 | 0.2  | 72.02 |
| Bacteria;__Planctomycetes;__BD7-11;__o;__f;__g                                                         | 0    | 0.21 | 0.17 | 2.02 | 0.2  | 72.22 |
| Bacteria;__Bacteroidetes;__Flavobacteriia;__Flavobacteriales;__Cryomorpaceae;__Fluviicola              | 0.14 | 0.31 | 0.17 | 1.16 | 0.2  | 72.42 |

|                                                                                                              |      |      |      |      |      |       |
|--------------------------------------------------------------------------------------------------------------|------|------|------|------|------|-------|
| Bacteria;__Proteobacteria;__Gammaproteobacteria;__Oceanospirillales;__Oceanospirillaceae;__Neptunomonas      | 0    | 0.23 | 0.17 | 0.89 | 0.2  | 72.62 |
| Bacteria;__Proteobacteria;__Alphaproteobacteria;__Sphingomonadales;__Erythrobacteraceae;__Altererythrobacter | 0    | 0.2  | 0.17 | 0.66 | 0.2  | 72.82 |
| Bacteria;__Actinobacteria;__Actinobacteria;__Micrococcales;__Microbacteriaceae;__Alpinimonas                 | 0.19 | 0    | 0.17 | 0.66 | 0.2  | 73.02 |
| Eukaryota;__Rhizaria;__Cercozoa;__Thecofilosea;Other;Other                                                   | 0.08 | 0.2  | 0.17 | 1.03 | 0.2  | 73.22 |
| Bacteria;__Proteobacteria;__Alphaproteobacteria;__Rhodospirillales;__Rhodospirillaceae;__Defluviococcus      | 0    | 0.2  | 0.17 | 0.66 | 0.2  | 73.42 |
| Bacteria;__Proteobacteria;__Gammaproteobacteria;__Thiotrichales;__Thiotrichaceae;__Leucothrix                | 0    | 0.23 | 0.17 | 0.9  | 0.2  | 73.61 |
| Eukaryota;__Chloroplastida;__Chlorophyceae;__;__;__                                                          | 0.22 | 0    | 0.17 | 1.17 | 0.19 | 73.81 |
| Eukaryota;__Alveolata;__Ciliophora;__Conthreep;__Prostomatea;__Cryptocaryon                                  | 0.26 | 0.08 | 0.16 | 1.79 | 0.19 | 74    |
| Bacteria;__Candidate_division_OP3;__c;__o;__f;__g                                                            | 0.11 | 0.23 | 0.16 | 1.04 | 0.19 | 74.19 |
| Bacteria;__Proteobacteria;__Gammaproteobacteria;__Order_Incertae_Sedis;__Family_Incertae_Sedis;__Arenicella  | 0    | 0.21 | 0.16 | 1.15 | 0.19 | 74.38 |
| Bacteria;__WCHB1-60;__c;__o;__f;__g                                                                          | 0.18 | 0    | 0.16 | 0.76 | 0.19 | 74.56 |
| Bacteria;__Bacteroidetes;__Bacteroidia;__Bacteroidales;__Marinilabiaceae;__Marinifilum                       | 0    | 0.22 | 0.16 | 0.91 | 0.19 | 74.75 |
| Bacteria;__Proteobacteria;__Gammaproteobacteria;__Xanthomonadales;__Xanthomonadaceae;Other                   | 0.21 | 0    | 0.16 | 1.13 | 0.19 | 74.93 |
| Bacteria;__Proteobacteria;__Gammaproteobacteria;__Pseudomonadales;__Pseudomonadaceae;__Pseudomonas           | 0.12 | 0.3  | 0.16 | 1.26 | 0.18 | 75.12 |
| Eukaryota;__Rhizaria;__Cercozoa;Other;Other;Other                                                            | 0.19 | 0.21 | 0.16 | 1.51 | 0.18 | 75.3  |
| Bacteria;__Proteobacteria;__Alphaproteobacteria;__Rhodobacterales;__Rhodobacteraceae;__Sulfitobacter         | 0    | 0.22 | 0.16 | 0.66 | 0.18 | 75.49 |
| Bacteria;__Firmicutes;__Bacilli;__Bacillales;__Staphylococcaceae;Other                                       | 0.2  | 0    | 0.15 | 1.29 | 0.18 | 75.66 |
| Archaea;__Euryarchaeota;__Methanomicrobia;__Methanomicrobiales;__Methanoregulaceae;__Methanoregula           | 0.19 | 0    | 0.15 | 2.05 | 0.17 | 75.84 |
| Bacteria;__Proteobacteria;__Betaproteobacteria;__Burkholderiales;__Comamonadaceae;__Acidovorax               | 0.13 | 0.14 | 0.15 | 1.85 | 0.17 | 76.01 |
| Bacteria;__Firmicutes;__Clostridia;__Clostridiales;__Ruminococcaceae;__Faecalibacterium                      | 0.11 | 0.16 | 0.14 | 1.27 | 0.17 | 76.18 |
| Bacteria;__Proteobacteria;__Alphaproteobacteria;__Rhodospirillales;__Rhodospirillaceae;__Thalassospira       | 0    | 0.17 | 0.14 | 1.27 | 0.17 | 76.35 |
| Eukaryota;__Fungi;__Blastocladiomycota;__;__;__                                                              | 0.19 | 0    | 0.14 | 1.16 | 0.17 | 76.52 |
| Eukaryota;__Stramenopiles;__Diatomea;__Coscinodiscophytina;__Fragilariales;__                                | 0    | 0.19 | 0.14 | 0.95 | 0.17 | 76.68 |
| Bacteria;__Proteobacteria;__Gammaproteobacteria;__Oceanospirillales;__Oceanospirillaceae;__Marinomonas       | 0    | 0.17 | 0.14 | 1.07 | 0.16 | 76.84 |
| Bacteria;__Bacteroidetes;__Bacteroidia;__Bacteroidales;__Prevotellaceae;__Prevotella                         | 0.19 | 0.21 | 0.14 | 1.42 | 0.16 | 77    |
| Bacteria;__Proteobacteria;__Gammaproteobacteria;__Xanthomonadales;__Sinobacteraceae;__g                      | 0.17 | 0    | 0.14 | 4.55 | 0.16 | 77.16 |
| Bacteria;__Bacteroidetes;__Flavobacteria;__Flavobacteriales;__Flavobacteriaceae;__Chryseobacterium           | 0.18 | 0    | 0.14 | 1.31 | 0.16 | 77.32 |
| Bacteria;__Proteobacteria;__Deltaproteobacteria;__Syntrophobacterales;__Syntrophaceae;__Smithella            | 0.17 | 0    | 0.13 | 6.45 | 0.16 | 77.48 |

|                                                                                                       |      |      |      |      |      |       |
|-------------------------------------------------------------------------------------------------------|------|------|------|------|------|-------|
| Bacteria;__Lentisphaerae;__Lentisphaeria;__Lentisphaerales;__Lentisphaeraeae;__Lentisphaera           | 0    | 0.18 | 0.13 | 0.97 | 0.16 | 77.64 |
| Bacteria;__Actinobacteria;__Acidimicrobiia;__Acidimicrobiales;__OCS155_marine_group;__g               | 0    | 0.16 | 0.13 | 0.66 | 0.16 | 77.8  |
| Bacteria;__Proteobacteria;__Betaproteobacteria;__Burkholderiales;__Comamonadaceae;__Pelomonas         | 0.17 | 0    | 0.13 | 1.06 | 0.16 | 77.95 |
| Bacteria;__Proteobacteria;__Deltaproteobacteria;__Desulfobacterales;__Nitrospinaceae;__Nitrospina     | 0    | 0.16 | 0.13 | 1.15 | 0.15 | 78.11 |
| Bacteria;__Proteobacteria;__Gammaproteobacteria;__Alteromonadales;__Alteromonadaceae;__BD1-7_clade    | 0.18 | 0    | 0.13 | 1.28 | 0.15 | 78.26 |
| Eukaryota;__Alveolata;__Ciliophora;__Conthreep;__Phyllopharyngea;__Hartmannula                        | 0    | 0.18 | 0.13 | 0.66 | 0.15 | 78.41 |
| Bacteria;__Bacteroidetes;__Sphingobacteriia;__Sphingobacteriales;__Chitinophagaceae;__Ferruginibacter | 0.17 | 0    | 0.13 | 1.28 | 0.15 | 78.56 |
| Eukaryota;__Fungi;Other;Other;Other;Other                                                             | 0.17 | 0    | 0.13 | 1.3  | 0.15 | 78.71 |
| Bacteria;__Bacteroidetes;__Cytophagia;__Cytophagales;__Flammeovirgaceae;__Marinoscillum               | 0    | 0.16 | 0.12 | 1.3  | 0.15 | 78.86 |
| Bacteria;__Proteobacteria;__Gammaproteobacteria;__Legionellales;__Coxiellaceae;__Coxiella             | 0    | 0.16 | 0.12 | 0.96 | 0.15 | 79.01 |
| Eukaryota;__Alveolata;__Ciliophora;__Conthreep;__Nassophorea;__                                       | 0    | 0.17 | 0.12 | 0.99 | 0.15 | 79.15 |
| Bacteria;__Bacteroidetes;__vadinHA17;__o;__f;__g                                                      | 0.16 | 0    | 0.12 | 2.9  | 0.15 | 79.3  |
| Bacteria;__Proteobacteria;__Deltaproteobacteria;__Sh765B-TzT-29;__f;__g                               | 0    | 0.15 | 0.12 | 0.66 | 0.14 | 79.44 |
| Eukaryota;__Alveolata;__Dinoflagellata;__Dinophyceae;__Gymnodiniophycidae;__FV18-2D9                  | 0.16 | 0    | 0.12 | 1.29 | 0.14 | 79.59 |
| Bacteria;__Actinobacteria;Other;Other;Other;Other                                                     | 0.15 | 0    | 0.12 | 1.02 | 0.14 | 79.73 |
| Eukaryota;__Stramenopiles;__Eustigmatales;__Nannochloropsis;__;__                                     | 0.16 | 0    | 0.12 | 1.31 | 0.14 | 79.87 |
| Bacteria;__Bacteroidetes;__Sphingobacteriia;__Sphingobacteriales;__Sphingobacteriaceae;__Pedobacter   | 0.17 | 0    | 0.12 | 0.86 | 0.14 | 80.02 |

#### Groups Seal Pool & Winston Lagoon

Average dissimilarity = 85.12

| Species                                                                                                | Seal Pool | Winston Lagoon | Av.Diss | Diss/SD | Contrib% | Cum.% |
|--------------------------------------------------------------------------------------------------------|-----------|----------------|---------|---------|----------|-------|
|                                                                                                        | Av.Abund  | Av.Abund       |         |         |          |       |
| Bacteria;__Actinobacteria;__Actinobacteria;__PeM15;__f;__g                                             | 3.86      | 0.04           | 2.92    | 1.63    | 3.44     | 3.44  |
| Bacteria;__Bacteroidetes;__Flavobacteria;__Flavobacteriales;__Flavobacteriaceae;__Flavobacterium       | 3.15      | 0              | 2.36    | 1.94    | 2.77     | 6.2   |
| Bacteria;__Cyanobacteria;__Chloroplast;__Chloroplast;__Chloroplast;__Chloroplast                       | 0.84      | 3.37           | 2.13    | 1.14    | 2.5      | 8.7   |
| Bacteria;__Proteobacteria;__Alphaproteobacteria;__SAR11_clade;__Surface_1;__g                          | 0.06      | 2.12           | 1.61    | 0.76    | 1.89     | 10.59 |
| Bacteria;__Bacteroidetes;__Flavobacteria;__Flavobacteriales;__Flavobacteriaceae;Other                  | 0.05      | 2.34           | 1.59    | 0.95    | 1.87     | 12.46 |
| Bacteria;__Proteobacteria;__Betaproteobacteria;__Burkholderiales;__Burkholderiaceae;__Polynucleobacter | 2.03      | 0              | 1.57    | 1.17    | 1.85     | 14.31 |
| Bacteria;__Proteobacteria;__Betaproteobacteria;__Burkholderiales;__Comamonadaceae;Other                | 2.78      | 1.03           | 1.57    | 1.68    | 1.84     | 16.15 |
| Bacteria;__Proteobacteria;__Betaproteobacteria;__Burkholderiales;__Comamonadaceae;__Polaromonas        | 2         | 0.11           | 1.42    | 2.1     | 1.67     | 17.82 |

|                                                                                                                               |      |      |      |      |      |       |
|-------------------------------------------------------------------------------------------------------------------------------|------|------|------|------|------|-------|
| Bacteria;__Proteobacteria;__Alphaproteobacteria;__Sphingomonadales;__Sphingomonadaceae;__Sphingopyxis                         | 0.02 | 1.75 | 1.4  | 0.78 | 1.64 | 19.47 |
| Archaea;__Thaumarchaeota;__Marine_Group_I;__o;__f;__g                                                                         | 0    | 1.55 | 1.21 | 0.93 | 1.42 | 20.88 |
| Bacteria;__Proteobacteria;__Alphaproteobacteria;__Rhodobacterales;__Rhodobacteraceae;Other                                    | 1.79 | 1.87 | 1.04 | 1.25 | 1.22 | 22.1  |
| Bacteria;__Proteobacteria;__Gammaproteobacteria;__Oceanospirillales;__SAR86_clade;__g                                         | 0.06 | 1.39 | 1.04 | 0.98 | 1.22 | 23.32 |
| Bacteria;__Proteobacteria;__Gammaproteobacteria;__Oceanospirillales;__ZD0405;__g                                              | 0.08 | 1.34 | 0.99 | 0.96 | 1.16 | 24.48 |
| Bacteria;__Actinobacteria;__Actinobacteria;__Frankiales;__Sporichthyaceae;__hgcl_clade                                        | 1.22 | 0    | 0.94 | 1.08 | 1.11 | 25.59 |
| Bacteria;__Proteobacteria;__Betaproteobacteria;__Burkholderiales;__Comamonadaceae;__Simplicispira                             | 1.25 | 0    | 0.93 | 1.67 | 1.09 | 26.68 |
| Bacteria;__Actinobacteria;__Actinobacteria;__Micrococcales;__Microbacteriaceae;Other                                          | 1.18 | 0    | 0.91 | 1.34 | 1.07 | 27.75 |
| Bacteria;__Bacteroidetes;__Sphingobacteriia;__Sphingobacteriales;__Chitinophagaceae;__Sediminibacterium                       | 1.15 | 0    | 0.86 | 2.52 | 1.01 | 28.76 |
| Bacteria;__Proteobacteria;__Gammaproteobacteria;__Alteromonadales;__Pseudoalteromonadaceae;__g                                | 0    | 1.15 | 0.84 | 1.66 | 0.98 | 29.75 |
| Bacteria;__Proteobacteria;__Betaproteobacteria;__Burkholderiales;__Comamonadaceae;__g                                         | 1.15 | 0.04 | 0.83 | 1.33 | 0.97 | 30.72 |
| Bacteria;__Bacteroidetes;__Sphingobacteriia;__Sphingobacteriales;__Sphingobacteriaceae;__Pedobacter                           | 1.06 | 0    | 0.8  | 1.94 | 0.95 | 31.66 |
| Bacteria;__Actinobacteria;__Actinobacteria;__Frankiales;__Sporichthyaceae;Other                                               | 1.02 | 0    | 0.79 | 1.06 | 0.92 | 32.59 |
| Eukaryota;__Chloroplastida;__Chlorophyceae;__Desmodesmus;__;__                                                                | 1.02 | 0    | 0.77 | 1.12 | 0.9  | 33.49 |
| Archaea;__Euryarchaeota;__Halobacteria;__Halobacteriales;__Deep_Sea_Hydrothermal_Vent_Gp_6(DHVEG-6);__Candidatus_Parvarchaeum | 0.3  | 1.11 | 0.77 | 0.84 | 0.9  | 34.39 |
| Eukaryota;__Rhizaria;__Cercozoa;__Thecofilosea;Other;Other                                                                    | 1.1  | 0.2  | 0.74 | 1.63 | 0.87 | 35.26 |
| Bacteria;__Bacteroidetes;__Flavobacteria;__Flavobacteriales;__Flavobacteriaceae;__NS3a_marine_group                           | 0    | 0.9  | 0.72 | 0.9  | 0.85 | 36.1  |
| Bacteria;__Bacteroidetes;__Sphingobacteriia;__Sphingobacteriales;__NS11-12_marine_group;__g                                   | 1.14 | 0.35 | 0.7  | 1.26 | 0.82 | 36.92 |
| Bacteria;__Proteobacteria;__Gammaproteobacteria;__Alteromonadales;__Colwelliaceae;__Colwellia                                 | 0    | 0.95 | 0.7  | 1.75 | 0.82 | 37.74 |
| Bacteria;__Proteobacteria;__Betaproteobacteria;__Burkholderiales;__Comamonadaceae;__Paucibacter                               | 0.97 | 0.04 | 0.69 | 1.18 | 0.81 | 38.55 |
| Bacteria;__Actinobacteria;__Actinobacteria;__Corynebacteriales;__Nocardiaceae;__Rhodococcus                                   | 0    | 0.96 | 0.68 | 1.11 | 0.8  | 39.35 |
| Bacteria;__Proteobacteria;__Alphaproteobacteria;__Rhodobacterales;__Rhodobacteraceae;__g                                      | 0    | 0.89 | 0.64 | 1.42 | 0.76 | 40.11 |
| Eukaryota;__Chloroplastida;__Mamiellophyceae;__Micromonas;__;__                                                               | 0    | 0.8  | 0.64 | 0.94 | 0.75 | 40.86 |
| Bacteria;__Bacteroidetes;__Sphingobacteriia;__Sphingobacteriales;__Chitinophagaceae;__Ferruginibacter                         | 0.86 | 0    | 0.64 | 1.52 | 0.75 | 41.61 |
| Bacteria;__Bacteroidetes;__Flavobacteria;__Flavobacteriales;__Flavobacteriaceae;__Polaribacter                                | 0.06 | 0.91 | 0.6  | 1.15 | 0.7  | 42.31 |
| Bacteria;__Actinobacteria;Other;Other;Other;Other                                                                             | 0.78 | 0    | 0.6  | 1.66 | 0.7  | 43.02 |
| Bacteria;__Bacteroidetes;__Sphingobacteriia;__Sphingobacteriales;__Saprosiraceae;__g                                          | 0.76 | 0.34 | 0.57 | 1.11 | 0.67 | 43.69 |
| Bacteria;__Proteobacteria;__Betaproteobacteria;__Burkholderiales;__Comamonadaceae;__Albidiferax                               | 0.77 | 0    | 0.57 | 1.47 | 0.67 | 44.36 |
| Bacteria;__Proteobacteria;__Gammaproteobacteria;__Pseudomonadales;__Moraxellaceae;__Perlucidibaca                             | 0.76 | 0    | 0.57 | 2.73 | 0.67 | 45.02 |
| Archaea;__Euryarchaeota;__Halobacteria;__Halobacteriales;__Deep_Sea_Hydrothermal_Vent_Gp_6(DHVEG-6);__g                       | 0.41 | 0.68 | 0.55 | 1.1  | 0.64 | 45.67 |
| Bacteria;__Proteobacteria;__Alphaproteobacteria;__Rhodospirillales;__Acetobacteraceae;__Roseococcus                           | 0.71 | 0    | 0.53 | 1.38 | 0.62 | 46.29 |

|                                                                                                                           |      |      |      |       |      |       |
|---------------------------------------------------------------------------------------------------------------------------|------|------|------|-------|------|-------|
| Eukaryota;__Alveolata;__Ciliophora;__Conthreep;__Phyllopharyngea;__AT1-2                                                  | 0    | 0.75 | 0.52 | 0.9   | 0.61 | 46.9  |
| Bacteria;__Proteobacteria;__Betaproteobacteria;__Burkholderiales;__Alcaligenaceae;__Achromobacter                         | 0.67 | 0    | 0.51 | 2.44  | 0.6  | 47.5  |
| Bacteria;__Proteobacteria;__Alphaproteobacteria;__Sphingomonadales;__Sphingomonadaceae;__Novosphingobium                  | 0.68 | 0    | 0.51 | 2.09  | 0.6  | 48.1  |
| Bacteria;__Candidate_division_OP11;__c;__o;__f;__g                                                                        | 0.72 | 0.19 | 0.49 | 1.16  | 0.58 | 48.68 |
| Bacteria;__Bacteroidetes;__Sphingobacteriia;__Sphingobacteriales;__Chitinophagaceae;__g                                   | 0.71 | 0.13 | 0.49 | 1.18  | 0.57 | 49.25 |
| Bacteria;__Bacteroidetes;__Flavobacteria;__Flavobacteriales;__Flavobacteriaceae;__g                                       | 0    | 0.68 | 0.48 | 0.9   | 0.56 | 49.81 |
| Bacteria;__Actinobacteria;__Actinobacteria;__Micrococcales;__Microbacteriaceae;__Candidatus_Aquiluna                      | 0.62 | 0    | 0.47 | 1.62  | 0.56 | 50.37 |
| Bacteria;__Bacteroidetes;__Flavobacteria;__Flavobacteriales;__Cryomorpaceae;__Fluviicola                                  | 0.9  | 0.31 | 0.47 | 1.77  | 0.56 | 50.92 |
| Bacteria;__Candidate_division_OD1;__c;__o;__f;__g                                                                         | 0.3  | 0.56 | 0.47 | 1.09  | 0.55 | 51.47 |
| Bacteria;__Proteobacteria;__Alphaproteobacteria;__SAR11_clade;Other;Other                                                 | 0.05 | 0.61 | 0.47 | 0.78  | 0.55 | 52.02 |
| Archaea;__Euryarchaeota;__Methanomicrobia;__Methanomicrobiales;__Methanoregulaceae;__Methanoregula                        | 0.61 | 0    | 0.46 | 10.09 | 0.54 | 52.57 |
| Bacteria;__Actinobacteria;__Acidimicrobiia;__Acidimicrobiales;__Acidimicrobiaceae;__g                                     | 0.13 | 0.54 | 0.43 | 0.8   | 0.51 | 53.07 |
| Bacteria;__Proteobacteria;__Betaproteobacteria;__Burkholderiales;__Alcaligenaceae;Other                                   | 0.64 | 0.07 | 0.42 | 2.22  | 0.5  | 53.57 |
| Eukaryota;__Fungi;__Chytridiomycota;__;__;__                                                                              | 0.63 | 0.11 | 0.42 | 1.2   | 0.5  | 54.07 |
| Bacteria;__Proteobacteria;__Deltaproteobacteria;__Bdellovibrionales;__Bacteriovoraceae;__Peredibacter                     | 0.04 | 0.59 | 0.41 | 1.51  | 0.48 | 54.55 |
| Eukaryota;__Alveolata;__Ciliophora;__Conthreep;__Phyllopharyngea;__Dyteria                                                | 0    | 0.59 | 0.41 | 0.78  | 0.48 | 55.03 |
| Bacteria;__Proteobacteria;__Betaproteobacteria;__Burkholderiales;Other;Other                                              | 0.53 | 0    | 0.39 | 2.62  | 0.46 | 55.49 |
| Unassigned;Other;Other;Other;Other;Other                                                                                  | 0.91 | 1.43 | 0.39 | 1.43  | 0.46 | 55.95 |
| Bacteria;__Proteobacteria;__Deltaproteobacteria;__Bdellovibrionales;__Bacteriovoraceae;__Bacteriovorax                    | 0.5  | 0    | 0.38 | 4.85  | 0.45 | 56.4  |
| Bacteria;__Actinobacteria;__Acidimicrobiia;__Acidimicrobiales;__Acidimicrobiaceae;__CL500-29_marine_group                 | 0.49 | 0    | 0.38 | 0.97  | 0.45 | 56.85 |
| Bacteria;__Proteobacteria;__Alphaproteobacteria;__Rhodobacterales;__Rhodobacteraceae;__Roseobacter_clade_DC5-80-3_lineage | 0.07 | 0.55 | 0.38 | 2.35  | 0.44 | 57.29 |
| Bacteria;__Bacteroidetes;__Sphingobacteriia;__Sphingobacteriales;__Saprospiraceae;__Lewinella                             | 0    | 0.48 | 0.34 | 1.08  | 0.4  | 57.69 |
| Bacteria;__Bacteroidetes;__Cytophagia;__Cytophagales;__Cytophagaceae;__Leadbetterella                                     | 0.5  | 0.18 | 0.34 | 1.19  | 0.4  | 58.08 |
| Bacteria;__Candidate_division_TM7;__c;__o;__f;__g                                                                         | 0.41 | 0.19 | 0.34 | 1.07  | 0.4  | 58.48 |
| Bacteria;__Proteobacteria;__Betaproteobacteria;Other;Other;Other                                                          | 0.54 | 0.68 | 0.33 | 1.2   | 0.39 | 58.87 |
| Bacteria;__Bacteroidetes;__Sphingobacteriia;__Sphingobacteriales;__WCHB1-69;__g                                           | 0.44 | 0    | 0.33 | 1.13  | 0.38 | 59.26 |
| Bacteria;__Bacteroidetes;__Sphingobacteriia;__Sphingobacteriales;__Chitinophagaceae;__Filimonas                           | 0.42 | 0    | 0.31 | 0.94  | 0.37 | 59.62 |
| Bacteria;__Proteobacteria;__Gammaproteobacteria;__Pseudomonadales;__Moraxellaceae;__Psychrobacter                         | 0.53 | 0.16 | 0.31 | 1.53  | 0.36 | 59.98 |
| Bacteria;__Proteobacteria;__Gammaproteobacteria;__Oceanospirillales;__oc58;__g                                            | 0.39 | 0    | 0.29 | 2.12  | 0.35 | 60.33 |

|                                                                                                      |      |      |      |      |      |       |
|------------------------------------------------------------------------------------------------------|------|------|------|------|------|-------|
| Bacteria;__WCHB1-60;__c;__o;__f;__g                                                                  | 0.37 | 0    | 0.29 | 0.79 | 0.34 | 60.67 |
| Bacteria;__Bacteroidetes;__Flavobacteria;__Flavobacteriales;__Cryomorphaceae;__Owenweeksia           | 0    | 0.39 | 0.29 | 2.35 | 0.34 | 61.01 |
| Bacteria;__Proteobacteria;__Alphaproteobacteria;__SAR11_clade;__Surface_4;__g                        | 0    | 0.36 | 0.28 | 0.67 | 0.33 | 61.34 |
| Bacteria;__Verrucomicrobia;__Opitutae;__Opitutales;__Opitutaceae;__Opitutus                          | 0.36 | 0    | 0.27 | 1.48 | 0.32 | 61.65 |
| Bacteria;__Proteobacteria;__Alphaproteobacteria;__Rhodobacterales;__Rhodobacteraceae;__Loktanela     | 0    | 0.36 | 0.26 | 1.31 | 0.31 | 61.96 |
| Bacteria;__Actinobacteria;__Acidimicrobiia;__Acidimicrobiales;__uncultured;__g                       | 0.41 | 0.06 | 0.26 | 2.01 | 0.31 | 62.27 |
| Bacteria;__Gemmatimonadetes;__Gemmatimonadetes;__Gemmatimonadales;__Gemmatimonadaceae;__Gemmatimonas | 0.35 | 0    | 0.26 | 1.7  | 0.31 | 62.58 |
| Bacteria;__Proteobacteria;__Gammaproteobacteria;__Alteromonadales;__Alteromonadaceae;__Glaciecola    | 0    | 0.36 | 0.25 | 1.02 | 0.3  | 62.87 |
| Bacteria;__Bacteroidetes;__vadinHA17;__o;__f;__g                                                     | 0.34 | 0    | 0.25 | 2.49 | 0.3  | 63.17 |
| Bacteria;__Bacteroidetes;__Flavobacteria;__Flavobacteriales;__Flavobacteriaceae;__NS2b_marine_group  | 0.09 | 0.42 | 0.25 | 3.85 | 0.29 | 63.47 |
| Archaea;__Euryarchaeota;__Thermoplasmata;__Thermoplasmatales;__Marine_Group_II;__g                   | 0.05 | 0.37 | 0.25 | 2.15 | 0.29 | 63.76 |
| Bacteria;__Bacteroidetes;__Flavobacteria;__Flavobacteriales;__Flavobacteriaceae;__NS5_marine_group   | 0    | 0.32 | 0.25 | 1.35 | 0.29 | 64.05 |
| Bacteria;__Proteobacteria;__Betaproteobacteria;__Burkholderiales;__Comamonadaceae;__Acidovorax       | 0.38 | 0.14 | 0.25 | 1.33 | 0.29 | 64.34 |
| Bacteria;__Bacteroidetes;__Flavobacteria;__Flavobacteriales;__Flavobacteriaceae;__NS4_marine_group   | 0.05 | 0.36 | 0.24 | 2.35 | 0.28 | 64.62 |
| Bacteria;__Proteobacteria;__Gammaproteobacteria;__Oceanospirillales;__Oceanospirillaceae;Other       | 0.05 | 0.36 | 0.24 | 2.14 | 0.28 | 64.9  |
| Bacteria;__Proteobacteria;__Gammaproteobacteria;__Alteromonadales;__Alteromonadaceae;__SAR92_clade   | 0.07 | 0.35 | 0.22 | 1.88 | 0.26 | 65.16 |
| Bacteria;__Bacteroidetes;__Sphingobacteriia;__Sphingobacteriales;__Saprospiraceae;__Aureispira       | 0    | 0.32 | 0.22 | 0.82 | 0.26 | 65.42 |
| Eukaryota;__Alveolata;__Ciliophora;__Spirotrichea;__Hypotrichia;__                                   | 0    | 0.31 | 0.22 | 1.58 | 0.26 | 65.68 |
| Bacteria;__Proteobacteria;__Gammaproteobacteria;__BD7-8_marine_group;__f;__g                         | 0    | 0.29 | 0.22 | 1.19 | 0.26 | 65.94 |
| Eukaryota;__Chloroplastida;__Ulvophyceae;Other;Other;Other                                           | 0    | 0.31 | 0.22 | 1.12 | 0.25 | 66.19 |
| Bacteria;__Bacteroidetes;__Cytophagia;__Cytophagales;__Flammeovirgaceae;__Reichenbachiella           | 0    | 0.29 | 0.21 | 2.3  | 0.25 | 66.44 |
| Bacteria;__Proteobacteria;__Gammaproteobacteria;__Alteromonadales;__Alteromonadaceae;__BD1-7_clade   | 0.29 | 0    | 0.21 | 1.51 | 0.25 | 66.69 |
| Bacteria;__Proteobacteria;__Betaproteobacteria;__Burkholderiales;__Comamonadaceae;__Rhizobacter      | 0.28 | 0    | 0.21 | 2.4  | 0.25 | 66.94 |
| Bacteria;__Fusobacteria;__Fusobacteria;__Fusobacteriales;__Fusobacteriaceae;__Fusobacterium          | 0.38 | 0.36 | 0.21 | 1.29 | 0.25 | 67.19 |
| Bacteria;__Proteobacteria;__Betaproteobacteria;__Burkholderiales;__Oxalobacteraceae;__Undibacterium  | 0.28 | 0    | 0.21 | 3.2  | 0.25 | 67.43 |
| Bacteria;__Proteobacteria;__Gammaproteobacteria;__Alteromonadales;__Shewanellaceae;__Shewanella      | 0    | 0.28 | 0.21 | 3.04 | 0.25 | 67.68 |
| Bacteria;__Bacteroidetes;__Bacteroidia;__Bacteroidales;__Bacteroidaceae;__Bacteroides                | 0.21 | 0.3  | 0.21 | 1.33 | 0.25 | 67.93 |
| Bacteria;__Proteobacteria;__Alphaproteobacteria;__Rhodobacterales;__Rhodobacteraceae;__Rhodobacter   | 0.32 | 0.11 | 0.21 | 1.49 | 0.24 | 68.17 |
| Bacteria;__Proteobacteria;__Alphaproteobacteria;__Kordiimonadales;__Kordiimonadaceae;__Kordiimonas   | 0    | 0.28 | 0.21 | 1.74 | 0.24 | 68.41 |
| Eukaryota;__Alveolata;__Ciliophora;__Spirotrichea;__Oligotrichia;__Strombidium                       | 0    | 0.27 | 0.2  | 2.34 | 0.24 | 68.65 |

|                                                                                                              |      |      |      |      |      |       |
|--------------------------------------------------------------------------------------------------------------|------|------|------|------|------|-------|
| Bacteria;__Proteobacteria;__Betaproteobacteria;__Neisseriales;__Neisseriaceae;__g                            | 0.27 | 0    | 0.2  | 2.09 | 0.23 | 68.88 |
| Bacteria;__Proteobacteria;__Deltaproteobacteria;__Myxococcales;__0319-6G20;__g                               | 0.36 | 0.15 | 0.2  | 1.19 | 0.23 | 69.12 |
| Eukaryota;__Fungi;__LKM11;__;__;                                                                             | 0.26 | 0    | 0.2  | 2.62 | 0.23 | 69.35 |
| Bacteria;__Proteobacteria;__Gammaproteobacteria;__Enterobacteriales;__Enterobacteriaceae;Other               | 0.13 | 0.37 | 0.2  | 1.03 | 0.23 | 69.58 |
| Bacteria;__Proteobacteria;__Alphaproteobacteria;__Sphingomonadales;__Sphingomonadaceae;__Sandarakinorhabdus  | 0.27 | 0.04 | 0.19 | 1.41 | 0.23 | 69.8  |
| Eukaryota;__Alveolata;__Ciliophora;__Spirotrichea;__Oligotrichia;__uncultured                                | 0    | 0.26 | 0.19 | 3.2  | 0.22 | 70.03 |
| Bacteria;__Proteobacteria;__Alphaproteobacteria;__Rickettsiales;__SAR116_clade;__g                           | 0    | 0.24 | 0.19 | 1.23 | 0.22 | 70.25 |
| Bacteria;__Proteobacteria;__Alphaproteobacteria;__SAR11_clade;__f;__g                                        | 0    | 0.24 | 0.19 | 0.86 | 0.22 | 70.47 |
| Bacteria;__Bacteroidetes;__Flavobacteria;__Flavobacteriales;__Flavobacteriaceae;__Pibocella                  | 0    | 0.26 | 0.19 | 0.96 | 0.22 | 70.68 |
| Bacteria;__Proteobacteria;__Gammaproteobacteria;__Alteromonadales;Other;Other                                | 0    | 0.24 | 0.18 | 1.93 | 0.22 | 70.9  |
| Eukaryota;__Alveolata;__Ciliophora;__Spirotrichea;__Euplotia;__Aspidisca                                     | 0    | 0.26 | 0.18 | 1.81 | 0.22 | 71.12 |
| Bacteria;__Bacteroidetes;__Sphingobacterii;__Sphingobacteriales;__env.OPS_17;__g                             | 0.25 | 0    | 0.18 | 1.83 | 0.22 | 71.33 |
| Eukaryota;__Stramenopiles;__T53A1;__;__;                                                                     | 0.24 | 0    | 0.18 | 1.79 | 0.22 | 71.55 |
| Bacteria;__Proteobacteria;__Gammaproteobacteria;__Alteromonadales;__Moritellaceae;__Moritella                | 0    | 0.26 | 0.18 | 1.13 | 0.21 | 71.76 |
| Bacteria;__Bacteroidetes;__Flavobacteria;__Flavobacteriales;__NS9_marine_group;__g                           | 0.21 | 0.4  | 0.18 | 1.12 | 0.21 | 71.98 |
| Eukaryota;__Metazoa;__Arthropoda;__Maxillopoda;__;__                                                         | 0    | 0.25 | 0.18 | 2.15 | 0.21 | 72.19 |
| Bacteria;__Proteobacteria;__Gammaproteobacteria;__Thiotrichales;__Thiotrichaceae;__Thiothrix                 | 0    | 0.23 | 0.18 | 0.67 | 0.21 | 72.4  |
| Bacteria;__Candidate_division_OP3;__c;__o;__f;__g                                                            | 0.11 | 0.23 | 0.18 | 1.15 | 0.21 | 72.6  |
| Eukaryota;__Alveolata;__Protalveolata;__Perkinsidae;__NA2-2D10;__                                            | 0    | 0.23 | 0.17 | 1.18 | 0.2  | 72.81 |
| Bacteria;__Proteobacteria;__Gammaproteobacteria;__Chromatiales;__Granulosicoccaceae;__Granulosicoccus        | 0    | 0.24 | 0.17 | 1.33 | 0.2  | 73.01 |
| Bacteria;__Firmicutes;__Clostridia;__Clostridiales;__Ruminococcaceae;__g                                     | 0.24 | 0.21 | 0.17 | 1.5  | 0.2  | 73.22 |
| Bacteria;__Firmicutes;__Bacilli;__Bacillales;__Staphylococcaceae;Other                                       | 0.23 | 0    | 0.17 | 1.33 | 0.2  | 73.42 |
| Eukaryota;__Fungi;Other;Other;Other;Other                                                                    | 0.23 | 0    | 0.17 | 1.79 | 0.2  | 73.62 |
| Bacteria;__Proteobacteria;__Betaproteobacteria;__Burkholderiales;__Comamonadaceae;__Comamonas                | 0.22 | 0    | 0.17 | 1.09 | 0.2  | 73.81 |
| Bacteria;__Planctomycetes;__BD7-11;__o;__f;__g                                                               | 0    | 0.21 | 0.16 | 2.08 | 0.19 | 74.01 |
| Bacteria;__Bacteroidetes;__Bacteroidia;__Bacteroidales;__Prevotellaceae;__Prevotella                         | 0.24 | 0.21 | 0.16 | 1.46 | 0.19 | 74.2  |
| Eukaryota;__Stramenopiles;__Chrysophyceae;Other;Other;Other                                                  | 0.22 | 0    | 0.16 | 3.32 | 0.19 | 74.39 |
| Bacteria;__Proteobacteria;__Gammaproteobacteria;__Alteromonadales;__Alteromonadaceae;Other                   | 0.02 | 0.25 | 0.16 | 3.02 | 0.19 | 74.58 |
| Bacteria;__Proteobacteria;__Gammaproteobacteria;__Oceanospirillales;__Oceanospirillaceae;__Neptunomonas      | 0    | 0.23 | 0.16 | 0.89 | 0.19 | 74.77 |
| Bacteria;__Proteobacteria;__Alphaproteobacteria;__Sphingomonadales;__Erythrobacteraceae;__Altererythrobacter | 0    | 0.2  | 0.16 | 0.67 | 0.19 | 74.96 |
| Bacteria;__Proteobacteria;__Gammaproteobacteria;__Thiotrichales;__Thiotrichaceae;__Leucothrix                | 0    | 0.23 | 0.16 | 0.9  | 0.19 | 75.15 |

|                                                                                                             |      |      |      |      |      |       |
|-------------------------------------------------------------------------------------------------------------|------|------|------|------|------|-------|
| Bacteria;__Proteobacteria;__Alphaproteobacteria;__Rhodospirillales;__Rhodospirillaceae;__Defluviicoccus     | 0    | 0.2  | 0.16 | 0.67 | 0.19 | 75.33 |
| Eukaryota;__Chloroplastida;__Chlorophyceae;__Chlamydomonas;__;__                                            | 0.21 | 0    | 0.16 | 1.02 | 0.19 | 75.52 |
| Bacteria;__Proteobacteria;__Alphaproteobacteria;Other;Other;Other                                           | 0.02 | 0.21 | 0.16 | 0.89 | 0.18 | 75.7  |
| Bacteria;__Proteobacteria;__Betaproteobacteria;__Nitrosomonadales;__Nitrosomonadaceae;__Nitrosomonas        | 0.21 | 0.06 | 0.15 | 1.04 | 0.18 | 75.88 |
| Bacteria;__Proteobacteria;__Gammaproteobacteria;__Order_Incertae_Sedis;__Family_Incertae_Sedis;__Arenicella | 0    | 0.21 | 0.15 | 1.15 | 0.18 | 76.06 |
| Eukaryota;__Alveolata;__Ciliophora;__Spirotrichea;__Hypotrichia;Other                                       | 0.14 | 0.3  | 0.15 | 1.54 | 0.18 | 76.24 |
| Bacteria;__Bacteroidetes;__Bacteroidia;__Bacteroidales;__Marinilabiaceae;__Marinifilum                      | 0    | 0.22 | 0.15 | 0.91 | 0.18 | 76.42 |
| Bacteria;__Proteobacteria;__Gammaproteobacteria;Other;Other;Other                                           | 0.2  | 0.38 | 0.15 | 1.57 | 0.17 | 76.59 |
| Bacteria;__Actinobacteria;__Actinobacteria;Other;Other;Other                                                | 0.19 | 0    | 0.15 | 1.23 | 0.17 | 76.77 |
| Bacteria;__Proteobacteria;__Alphaproteobacteria;__Rhodobacterales;__Rhodobacteraceae;__Sulfitobacter        | 0    | 0.22 | 0.15 | 0.67 | 0.17 | 76.94 |
| Bacteria;__Proteobacteria;__Alphaproteobacteria;__Rhodobacterales;__Rhodobacteraceae;__Paracoccus           | 0.18 | 0.07 | 0.15 | 0.86 | 0.17 | 77.11 |
| Eukaryota;__Rhizaria;__Cercozoa;Other;Other;Other                                                           | 0.02 | 0.21 | 0.14 | 1.11 | 0.17 | 77.28 |
| Bacteria;Other;Other;Other;Other;Other                                                                      | 0.19 | 0    | 0.14 | 1.64 | 0.16 | 77.44 |
| Bacteria;__Proteobacteria;__Alphaproteobacteria;__Rhodospirillales;__Rhodospirillaceae;__Thalassospira      | 0    | 0.17 | 0.14 | 1.29 | 0.16 | 77.6  |
| Eukaryota;__Stramenopiles;__Diatomea;__Coscinodiscophytina;__Fragilariales;__                               | 0    | 0.19 | 0.13 | 0.95 | 0.16 | 77.76 |
| Bacteria;__Actinobacteria;__Actinobacteria;__Corynebacteriales;__Mycobacteriaceae;__Mycobacterium           | 0.18 | 0    | 0.13 | 1.08 | 0.16 | 77.92 |
| Bacteria;__Proteobacteria;Other;Other;Other;Other                                                           | 0.24 | 0.06 | 0.13 | 1.47 | 0.16 | 78.08 |
| Bacteria;__Proteobacteria;__Gammaproteobacteria;__Pseudomonadales;__Pseudomonadaceae;__Pseudomonas          | 0.12 | 0.3  | 0.13 | 1.23 | 0.15 | 78.23 |
| Bacteria;__Proteobacteria;__Gammaproteobacteria;__Oceanospirillales;__Oceanospirillaceae;__Marinomonas      | 0    | 0.17 | 0.13 | 1.08 | 0.15 | 78.38 |
| Bacteria;__Verrucomicrobia;__Verrucomicrobiae;__Verrucomicrobiales;__Verrucomicrobiaceae;__g                | 0.17 | 0    | 0.13 | 3.01 | 0.15 | 78.54 |
| Bacteria;__Bacteroidetes;__Sphingobacteriia;__Sphingobacteriales;Other;Other                                | 0.17 | 0    | 0.13 | 3.69 | 0.15 | 78.69 |
| Bacteria;__Proteobacteria;__Deltaproteobacteria;__Syntrophobacterales;__Syntrophaceae;__Smithella           | 0.16 | 0    | 0.13 | 0.66 | 0.15 | 78.84 |
| Bacteria;__Proteobacteria;__Alphaproteobacteria;__Rhizobiales;__Hyphomicrobiaceae;__Devosia                 | 0.17 | 0    | 0.13 | 1.32 | 0.15 | 78.99 |
| Bacteria;__Lentisphaerae;__Lentisphaeria;__Lentisphaerales;__Lentisphaeraceae;__Lentisphaera                | 0    | 0.18 | 0.13 | 0.97 | 0.15 | 79.14 |
| Bacteria;__Actinobacteria;__Acidimicrobiia;__Acidimicrobiales;__OCS155_marine_group;__g                     | 0    | 0.16 | 0.13 | 0.67 | 0.15 | 79.29 |
| Bacteria;__Proteobacteria;__Gammaproteobacteria;__Oceanospirillales;__Oceanospirillaceae;__Pseudospirillum  | 0.18 | 0.06 | 0.13 | 1.25 | 0.15 | 79.43 |
| Bacteria;__Bacteroidetes;__WCHB1-32;__o;__f;__g                                                             | 0.17 | 0    | 0.13 | 1.22 | 0.15 | 79.58 |
| Eukaryota;__Alveolata;__Ciliophora;__Conthreep;__Phyllopharyngea;__Hartmannula                              | 0    | 0.18 | 0.12 | 0.67 | 0.15 | 79.73 |
| Bacteria;__Proteobacteria;__Deltaproteobacteria;__Desulfobacterales;__Nitrospinae;__Nitrospina              | 0    | 0.16 | 0.12 | 1.16 | 0.14 | 79.87 |



|                                                                                       |      |   |      |      |      |       |
|---------------------------------------------------------------------------------------|------|---|------|------|------|-------|
| Bacteria;__Proteobacteria;__Betaproteobacteria;__Rhodocyclales;__Rhodocyclaceae;Other | 0.16 | 0 | 0.12 | 3.16 | 0.14 | 80.01 |
|---------------------------------------------------------------------------------------|------|---|------|------|------|-------|

Groups Atlas Cove & Winston Lagoon

Average dissimilarity = 68.61

| Species                                                                                                                       | Atlas Cove | Winston Lagoon | Av.Diss | Diss/SD | Contrib% | Cum.% |
|-------------------------------------------------------------------------------------------------------------------------------|------------|----------------|---------|---------|----------|-------|
|                                                                                                                               | Av.Abund   | Av.Abund       |         |         |          |       |
| Bacteria;__Proteobacteria;__Gammaproteobacteria;Other;Other;Other                                                             | 3.15       | 0.38           | 2.16    | 2.49    | 3.14     | 3.14  |
| Bacteria;__Proteobacteria;__Alphaproteobacteria;__SAR11_clade;__Surface_1;__g                                                 | 2.82       | 2.12           | 2.1     | 1.36    | 3.06     | 6.2   |
| Bacteria;__Cyanobacteria;__Chloroplast;__Chloroplast;__Chloroplast;__Chloroplast                                              | 2.38       | 3.37           | 1.93    | 1.14    | 2.81     | 9.01  |
| Bacteria;__Proteobacteria;__Gammaproteobacteria;__Oceanospirillales;__ZD0405;__g                                              | 3.19       | 1.34           | 1.72    | 1.34    | 2.51     | 11.53 |
| Bacteria;__Proteobacteria;__Gammaproteobacteria;__Alteromonadales;__Alteromonadaceae;__SAR92_clade                            | 2.09       | 0.35           | 1.34    | 2.01    | 1.96     | 13.48 |
| Bacteria;__Bacteroidetes;__Flavobacteria;__Flavobacteriales;__Flavobacteriaceae;Other                                         | 1.01       | 2.34           | 1.33    | 0.91    | 1.94     | 15.42 |
| Bacteria;__Proteobacteria;__Alphaproteobacteria;__Sphingomonadales;__Sphingomonadaceae;__Sphingopyxis                         | 0.26       | 1.75           | 1.31    | 0.71    | 1.91     | 17.33 |
| Bacteria;__Proteobacteria;__Alphaproteobacteria;__Rhodobacterales;__Rhodobacteraceae;Other                                    | 0.29       | 1.87           | 1.24    | 1.41    | 1.81     | 19.14 |
| Bacteria;__Bacteroidetes;__Flavobacteria;__Flavobacteriales;__Flavobacteriaceae;__NS2b_marine_group                           | 1.92       | 0.42           | 1.19    | 3.32    | 1.73     | 20.87 |
| Bacteria;__Proteobacteria;__Gammaproteobacteria;__Oceanospirillales;__SAR86_clade;__g                                         | 1.99       | 1.39           | 1.08    | 1.93    | 1.58     | 22.45 |
| Archaea;__Thaumarchaeota;__Marine_Group_I;__o;__f;__g                                                                         | 0.65       | 1.55           | 0.97    | 0.85    | 1.42     | 23.86 |
| Bacteria;__Bacteroidetes;__Flavobacteria;__Flavobacteriales;__NS9_marine_group;__g                                            | 1.54       | 0.4            | 0.9     | 3.14    | 1.31     | 25.17 |
| Archaea;__Euryarchaeota;__Halobacteria;__Halobacteriales;__Deep_Sea_Hydrothermal_Vent_Gp_6(DHVEG-6);__Candidatus_Parvarchaeum | 0          | 1.11           | 0.89    | 0.84    | 1.3      | 26.47 |
| Bacteria;__Proteobacteria;__Betaproteobacteria;__Burkholderiales;__Comamonadaceae;Other                                       | 0.03       | 1.03           | 0.86    | 0.69    | 1.25     | 27.72 |
| Bacteria;__Proteobacteria;__Gammaproteobacteria;__Alteromonadales;__Pseudoalteromonadaceae;__Pseudoalteromonas                | 1.18       | 0              | 0.86    | 1.54    | 1.25     | 28.97 |
| Bacteria;__Proteobacteria;__Alphaproteobacteria;__Rhodobacterales;__Rhodobacteraceae;__Roseobacter_clade_DC5-80-3_lineage     | 1.59       | 0.55           | 0.83    | 2.06    | 1.21     | 30.17 |
| Bacteria;__Proteobacteria;__Gammaproteobacteria;__Alteromonadales;__Pseudoalteromonadaceae;__g                                | 0.07       | 1.15           | 0.81    | 1.51    | 1.18     | 31.35 |
| Bacteria;__Bacteroidetes;__Flavobacteria;__Flavobacteriales;__Flavobacteriaceae;__Polaribacter                                | 1.7        | 0.91           | 0.81    | 1.66    | 1.18     | 32.53 |
| Bacteria;__Proteobacteria;__Gammaproteobacteria;__Alteromonadales;__Alteromonadaceae;__Alteromonas                            | 1.1        | 0              | 0.8     | 1.32    | 1.16     | 33.69 |
| Bacteria;__Bacteroidetes;__Flavobacteria;__Flavobacteriales;__Flavobacteriaceae;__NS4_marine_group                            | 1.31       | 0.36           | 0.79    | 1.46    | 1.15     | 34.84 |
| Archaea;__Euryarchaeota;__Thermoplasmata;__Thermoplasmatales;__Marine_Group_II;__g                                            | 1.28       | 0.37           | 0.75    | 1.46    | 1.09     | 35.93 |

|                                                                                                         |      |      |      |      |      |       |
|---------------------------------------------------------------------------------------------------------|------|------|------|------|------|-------|
| Eukaryota;__Stramenopiles;__MAST-1;__MAST-1 B;__;__                                                     | 1    | 0    | 0.73 | 1.29 | 1.06 | 36.99 |
| Bacteria;__Actinobacteria;__Actinobacteria;__Corynebacteriales;__Nocardiaceae;__Rhodococcus             | 0    | 0.96 | 0.7  | 1.1  | 1.02 | 38.02 |
| Eukaryota;Other;Other;Other;Other;Other                                                                 | 0.97 | 0.11 | 0.64 | 0.86 | 0.94 | 38.95 |
| Eukaryota;__Haptophyta;__Prymnesiophyceae;Other;Other;Other                                             | 0.86 | 0    | 0.62 | 1.32 | 0.91 | 39.86 |
| Bacteria;__Proteobacteria;__Alphaproteobacteria;__SAR11_clade;Other;Other                               | 0.9  | 0.61 | 0.62 | 1.58 | 0.9  | 40.76 |
| Eukaryota;__Chloroplastida;__Mamiellophyceae;__Micromonas;__;__                                         | 0.33 | 0.8  | 0.57 | 0.92 | 0.83 | 41.59 |
| Bacteria;__Bacteroidetes;__Flavobacteria;__Flavobacteriales;__Flavobacteriaceae;__NS3a_marine_group     | 0.38 | 0.9  | 0.57 | 0.79 | 0.83 | 42.43 |
| Bacteria;__Bacteroidetes;__Flavobacteria;__Flavobacteriales;Other;Other                                 | 0.84 | 0.09 | 0.56 | 1.86 | 0.82 | 43.25 |
| Archaea;__Euryarchaeota;__Halobacteria;__Halobacteriales;__Deep_Sea_Hydrothermal_Vent_Gp_6(DHVEG-6);__g | 0    | 0.68 | 0.54 | 0.78 | 0.78 | 44.03 |
| Eukaryota;__Alveolata;__Ciliophora;__Conthreep;__Phyllopharyngea;__AT1-2                                | 0    | 0.75 | 0.54 | 0.9  | 0.78 | 44.81 |
| Eukaryota;__Metazoa;__Arthropoda;__Maxillopoda;__;__                                                    | 0.78 | 0.25 | 0.52 | 0.91 | 0.76 | 45.57 |
| Eukaryota;__Alveolata;__Dinoflagellata;__Dinophyceae;__Gymnodiniphyceidae;__Gyrodinium                  | 0.77 | 0.09 | 0.52 | 0.76 | 0.75 | 46.32 |
| Bacteria;__Proteobacteria;__Gammaproteobacteria;__Alteromonadales;__Colwelliaceae;__Colwellia           | 0.61 | 0.95 | 0.5  | 1.39 | 0.73 | 47.05 |
| Bacteria;__Proteobacteria;__Gammaproteobacteria;__Oceanospirillales;__Alcanivoraceae;__Alcanivorax      | 0.67 | 0    | 0.49 | 2.4  | 0.72 | 47.77 |
| Bacteria;__Proteobacteria;__Alphaproteobacteria;__Rhodobacterales;__Rhodobacteraceae;__Sulfitobacter    | 0.73 | 0.22 | 0.49 | 1.34 | 0.71 | 48.48 |
| Eukaryota;__Picozoa;__;__;__                                                                            | 0.68 | 0    | 0.49 | 1.28 | 0.71 | 49.19 |
| Bacteria;__Proteobacteria;__Alphaproteobacteria;__Rhodobacterales;__Rhodobacteraceae;__g                | 0.85 | 0.89 | 0.48 | 1.58 | 0.69 | 49.89 |
| Bacteria;__Proteobacteria;__Deltaproteobacteria;__Bdellovibrionales;__Bacteriovoraceae;__Peredibacter   | 0    | 0.59 | 0.46 | 1.62 | 0.67 | 50.55 |
| Bacteria;__Candidate_division_OD1;__c;__o;__f;__g                                                       | 0    | 0.56 | 0.45 | 0.82 | 0.66 | 51.21 |
| Unassigned;Other;Other;Other;Other;Other                                                                | 1.01 | 1.43 | 0.45 | 1.64 | 0.66 | 51.87 |
| Bacteria;__Actinobacteria;__Acidimicrobiia;__Acidimicrobiales;__Acidimicrobiaceae;__g                   | 0.04 | 0.54 | 0.45 | 0.73 | 0.65 | 52.52 |
| Eukaryota;__Stramenopiles;__MAST-3;__;__;__                                                             | 0.61 | 0    | 0.44 | 1.29 | 0.65 | 53.17 |
| Bacteria;__Bacteroidetes;__Flavobacteria;__Flavobacteriales;__Flavobacteriaceae;__g                     | 0.39 | 0.68 | 0.44 | 1.11 | 0.64 | 53.81 |
| Eukaryota;__Stramenopiles;__MAST-7;__;__;__                                                             | 0.62 | 0.09 | 0.44 | 1.44 | 0.64 | 54.45 |
| Eukaryota;__Alveolata;__Ciliophora;__Conthreep;__Phyllopharyngea;__Dysteria                             | 0    | 0.59 | 0.42 | 0.78 | 0.61 | 55.05 |
| Bacteria;__Proteobacteria;__Alphaproteobacteria;__SAR11_clade;__Surface_4;__g                           | 0.49 | 0.36 | 0.41 | 1.87 | 0.6  | 55.66 |
| Bacteria;__Deferribacteres;__Deferribacteres;__Deferribacterales;__SAR406_clade(Marine_group_A);__g     | 0.55 | 0.12 | 0.4  | 1.07 | 0.58 | 56.24 |
| Bacteria;__Proteobacteria;__Betaproteobacteria;Other;Other;Other                                        | 0.45 | 0.68 | 0.37 | 1.21 | 0.54 | 56.78 |
| Bacteria;__Proteobacteria;__Gammaproteobacteria;__Pseudomonadales;__Moraxellaceae;__Perlucidibaca       | 0.49 | 0    | 0.35 | 1.34 | 0.51 | 57.29 |
| Bacteria;__Bacteroidetes;__Sphingobacteria;__Sphingobacteriales;__Saprospiraceae;__Lewinella            | 0    | 0.48 | 0.35 | 1.07 | 0.51 | 57.8  |
| Eukaryota;__Alveolata;__Protalveolata;__Syndiniales;__Syndiniales Group I;__                            | 0.48 | 0    | 0.35 | 1.3  | 0.51 | 58.31 |

|                                                                                                         |      |      |      |      |      |       |
|---------------------------------------------------------------------------------------------------------|------|------|------|------|------|-------|
| Bacteria;__Proteobacteria;__Gammaproteobacteria;__Oceanospirillales;__OM182_clade;__g                   | 0.55 | 0.09 | 0.34 | 1.63 | 0.5  | 58.81 |
| Bacteria;__Bacteroidetes;__Flavobacteria;__Flavobacteriales;__Flavobacteriaceae;__NS5_marine_group      | 0.6  | 0.32 | 0.34 | 1.08 | 0.5  | 59.3  |
| Eukaryota;__Alveolata;__Ciliophora;__Spirotrichea;__Oligotrichia;__Strombidium                          | 0.47 | 0.27 | 0.33 | 1.24 | 0.48 | 59.79 |
| Eukaryota;__Alveolata;__Ciliophora;__Spirotrichea;__Oligotrichia;__uncultured                           | 0.66 | 0.26 | 0.33 | 0.83 | 0.48 | 60.27 |
| Eukaryota;__Holozoa;__Choanomonada;__Acanthoecida;__Diaphanoeca;__                                      | 0.45 | 0.06 | 0.31 | 0.95 | 0.45 | 60.72 |
| Eukaryota;__Alveolata;__Protalveolata;__Syndiniales;__Syndiniales Group II;__                           | 0.41 | 0.06 | 0.29 | 1.37 | 0.42 | 61.14 |
| Bacteria;__Proteobacteria;__Alphaproteobacteria;__Rickettsiales;__SAR116_clade;__g                      | 0.57 | 0.24 | 0.28 | 1.66 | 0.41 | 61.55 |
| Eukaryota;__Stramenopiles;__MAST-1;__MAST-1 A;__;                                                       | 0.4  | 0.06 | 0.28 | 1.41 | 0.4  | 61.95 |
| Bacteria;__Proteobacteria;__Alphaproteobacteria;__Rhodobacterales;__Rhodobacteraceae;__Loktanella       | 0    | 0.36 | 0.27 | 1.29 | 0.4  | 62.35 |
| Bacteria;__Fusobacteria;__Fusobacteria;__Fusobacteriales;__Fusobacteriaceae;__Fusobacterium             | 0    | 0.36 | 0.27 | 1.65 | 0.39 | 62.74 |
| Bacteria;__Proteobacteria;__Gammaproteobacteria;__Alteromonadales;__Alteromonadaceae;__Glaciecola       | 0    | 0.36 | 0.26 | 1.01 | 0.38 | 63.12 |
| Eukaryota;__Alveolata;__Dinoflagellata;__Dinophyceae;__Gymnodiniphyidae;Other                           | 0.38 | 0    | 0.26 | 0.76 | 0.38 | 63.5  |
| Bacteria;__Proteobacteria;__Gammaproteobacteria;__Enterobacteriales;__Enterobacteriaceae;Other          | 0.05 | 0.37 | 0.26 | 1.23 | 0.38 | 63.87 |
| Bacteria;__Bacteroidetes;__Sphingobacteriia;__Sphingobacteriales;__NS11-12_marine_group;__g             | 0    | 0.35 | 0.26 | 0.98 | 0.37 | 64.24 |
| Eukaryota;__Metazoa;__Cnidaria;__Hydrozoa;__;                                                           | 0.33 | 0.09 | 0.25 | 0.91 | 0.37 | 64.61 |
| Eukaryota;__Alveolata;__Ciliophora;__Spirotrichea;__Choreotrichia;__uncultured                          | 0.37 | 0.06 | 0.25 | 0.87 | 0.36 | 64.98 |
| Bacteria;__Proteobacteria;__Gammaproteobacteria;__Oceanospirillales;__Oceanospirillaceae;Other          | 0.68 | 0.36 | 0.25 | 1.63 | 0.36 | 65.34 |
| Bacteria;__Bacteroidetes;__Cytophagia;__Cytophagales;__Flammeovirgaceae;__Marinoscillum                 | 0.33 | 0.16 | 0.25 | 1    | 0.36 | 65.7  |
| Bacteria;__Proteobacteria;__Alphaproteobacteria;Other;Other;Other                                       | 0.42 | 0.21 | 0.24 | 1.46 | 0.35 | 66.06 |
| Bacteria;__Proteobacteria;__Deltaproteobacteria;__SAR324_clade(Marine_group_B);__f;__g                  | 0.35 | 0.09 | 0.24 | 1.14 | 0.35 | 66.41 |
| Eukaryota;__Rhizaria;__Cercozoa;__Thecofilosea;__Cryomonadida;__Cryothecomonas                          | 0.34 | 0.11 | 0.24 | 1.03 | 0.35 | 66.76 |
| Bacteria;__Bacteroidetes;__Sphingobacteriia;__Sphingobacteriales;__Saprosiraceae;__g                    | 0    | 0.34 | 0.23 | 0.66 | 0.34 | 67.1  |
| Bacteria;__Bacteroidetes;__Sphingobacteriia;__Sphingobacteriales;__Saprosiraceae;__Aureispira           | 0    | 0.32 | 0.23 | 0.82 | 0.33 | 67.43 |
| Eukaryota;__Alveolata;__Ciliophora;__Spirotrichea;__Hypotrichia;__                                      | 0    | 0.31 | 0.23 | 1.56 | 0.33 | 67.76 |
| Eukaryota;__Alveolata;__Ciliophora;__Spirotrichea;__Hypotrichia;Other                                   | 0    | 0.3  | 0.23 | 2.05 | 0.33 | 68.09 |
| Bacteria;__Proteobacteria;__Alphaproteobacteria;__Rhodospirillales;__Rhodospirillaceae;__Defluviicoccus | 0.25 | 0.2  | 0.22 | 2.9  | 0.33 | 68.42 |
| Eukaryota;__Chloroplastida;__Ulvophyceae;Other;Other;Other                                              | 0    | 0.31 | 0.22 | 1.11 | 0.32 | 68.74 |
| Bacteria;__Proteobacteria;__Alphaproteobacteria;__SAR11_clade;__f;__g                                   | 0.32 | 0.24 | 0.22 | 1.11 | 0.32 | 69.07 |
| Bacteria;__Proteobacteria;__Gammaproteobacteria;__Alteromonadales;__Shewanellaceae;__Shewanella         | 0    | 0.28 | 0.22 | 2.87 | 0.32 | 69.38 |
| Eukaryota;__Stramenopiles;__MAST-8;__;                                                                  | 0.29 | 0    | 0.21 | 1.22 | 0.31 | 69.7  |
| Bacteria;__Bacteroidetes;__Cytophagia;__Cytophagales;__Flammeovirgaceae;Other                           | 0.27 | 0    | 0.21 | 1.89 | 0.31 | 70.01 |
| Bacteria;__Bacteroidetes;__Bacteroidia;__Bacteroidales;__Bacteroidaceae;__Bacteroides                   | 0.04 | 0.3  | 0.21 | 1.35 | 0.31 | 70.32 |
| Bacteria;__Proteobacteria;__Gammaproteobacteria;__Thiotrichales;__Thiotrichaceae;__Thiothrix            | 0.12 | 0.23 | 0.21 | 1.12 | 0.31 | 70.63 |

|                                                                                                              |      |      |      |      |      |       |
|--------------------------------------------------------------------------------------------------------------|------|------|------|------|------|-------|
| Bacteria;__Proteobacteria;__Alphaproteobacteria;__Kordiimonadales;__Kordiimonadaceae;__Kordiimonas           | 0    | 0.28 | 0.21 | 1.71 | 0.31 | 70.94 |
| Eukaryota;__Alveolata;__Dinoflagellata;__Dinophyceae;__Gymnodiniphyceidae;__Gymnodinium                      | 0.39 | 0.13 | 0.21 | 0.76 | 0.3  | 71.25 |
| Bacteria;__Proteobacteria;__Gammaproteobacteria;__BD7-8_marine_group;__f;__g                                 | 0.08 | 0.29 | 0.21 | 1.34 | 0.3  | 71.55 |
| Eukaryota;__Haptophyta;__Prymnesiophyceae;__Prymnesiales;Other;Other                                         | 0.27 | 0    | 0.2  | 1.32 | 0.29 | 71.83 |
| Eukaryota;__Rhizaria;__Cercozoa;__Thecofilosea;Other;Other                                                   | 0.19 | 0.2  | 0.19 | 1.28 | 0.28 | 72.12 |
| Bacteria;__Proteobacteria;__Gammaproteobacteria;__Alteromonadales;Other;Other                                | 0    | 0.24 | 0.19 | 1.86 | 0.28 | 72.4  |
| Eukaryota;__Alveolata;__Ciliophora;__Spirotrichea;__Euplotia;__Aspidisca                                     | 0    | 0.26 | 0.19 | 1.78 | 0.28 | 72.67 |
| Bacteria;Other;Other;Other;Other;Other                                                                       | 0.25 | 0    | 0.19 | 3.8  | 0.27 | 72.95 |
| Eukaryota;__Metazoa;__Annelida;__;__;__                                                                      | 0.27 | 0.09 | 0.18 | 1.11 | 0.27 | 73.22 |
| Bacteria;__Verrucomicrobia;__Opitutae;__MB11C04_marine_group;__f;__g                                         | 0.24 | 0    | 0.18 | 2.39 | 0.27 | 73.48 |
| Bacteria;__Bacteroidetes;__Flavobacteria;__Flavobacteriales;__Flavobacteriaceae;__Pibocella                  | 0.03 | 0.26 | 0.18 | 0.99 | 0.26 | 73.75 |
| Bacteria;__Candidate_division_OP3;__c;__o;__f;__g                                                            | 0    | 0.23 | 0.18 | 0.94 | 0.26 | 74.01 |
| Eukaryota;__Alveolata;__Protalveolata;__Perkinsidae;__NA2-2D10;__                                            | 0    | 0.23 | 0.18 | 1.16 | 0.26 | 74.27 |
| Bacteria;__Proteobacteria;__Gammaproteobacteria;__Chromatiales;__Granulosicoccaceae;__Granulosicoccus        | 0    | 0.24 | 0.18 | 1.31 | 0.26 | 74.53 |
| Eukaryota;__Telonema;__Incertae_Sedis;__;__;__                                                               | 0.23 | 0.07 | 0.17 | 0.86 | 0.25 | 74.78 |
| Bacteria;__Proteobacteria;__Gammaproteobacteria;__Pseudomonadales;__Pseudomonadaceae;__Pseudomonas           | 0.08 | 0.3  | 0.17 | 1.59 | 0.25 | 75.04 |
| Bacteria;__Planctomycetes;__BD7-11;__o;__f;__g                                                               | 0    | 0.21 | 0.17 | 2.01 | 0.25 | 75.29 |
| Bacteria;__Proteobacteria;__Gammaproteobacteria;__Alteromonadales;__Alteromonadaceae;Other                   | 0.45 | 0.25 | 0.17 | 1.59 | 0.25 | 75.53 |
| Bacteria;__Proteobacteria;__Gammaproteobacteria;__Oceanospirillales;__Oceanospirillaceae;__Balneatrix        | 0.25 | 0.04 | 0.17 | 1.32 | 0.24 | 75.77 |
| Eukaryota;__Stramenopiles;__MAST-1;__MAST-1 C;__;__                                                          | 0.24 | 0    | 0.17 | 0.92 | 0.24 | 76.02 |
| Bacteria;__Proteobacteria;__Alphaproteobacteria;__Sphingomonadales;__Erythrobacteraceae;__Altererythrobacter | 0    | 0.2  | 0.17 | 0.66 | 0.24 | 76.26 |
| Bacteria;__Proteobacteria;__Gammaproteobacteria;__Alteromonadales;__Moritellaceae;__Moritella                | 0.18 | 0.26 | 0.17 | 1.26 | 0.24 | 76.5  |
| Bacteria;__Proteobacteria;__Gammaproteobacteria;__Thiotrichales;__Thiotrichaceae;__Leucothrix                | 0    | 0.23 | 0.16 | 0.89 | 0.24 | 76.74 |
| Bacteria;__Bacteroidetes;__Flavobacteria;__Flavobacteriales;__Cryomorpaceae;__Owenweeksia                    | 0.47 | 0.39 | 0.16 | 1.11 | 0.23 | 76.97 |
| Eukaryota;__Alveolata;__Ciliophora;__Spirotrichea;__Choreotrichia;Other                                      | 0.22 | 0    | 0.16 | 0.94 | 0.23 | 77.2  |
| Eukaryota;__Chloroplastida;__Prasinophytae;__Pyramimonas;__;__                                               | 0.22 | 0.06 | 0.16 | 0.96 | 0.23 | 77.43 |
| Bacteria;__Candidate_division_TM7;__c;__o;__f;__g                                                            | 0    | 0.19 | 0.16 | 0.66 | 0.23 | 77.66 |
| Bacteria;__Bacteroidetes;__Cytophagia;__Cytophagales;__Cytophagaceae;__Leadbetterella                        | 0    | 0.18 | 0.15 | 0.66 | 0.23 | 77.88 |
| Bacteria;__Proteobacteria;Other;Other;Other;Other                                                            | 0.25 | 0.06 | 0.15 | 1.72 | 0.22 | 78.1  |
| Bacteria;__Bacteroidetes;__Bacteroidia;__Bacteroidales;__Prevotellaceae;__Prevotella                         | 0    | 0.21 | 0.15 | 1.6  | 0.22 | 78.33 |
| Bacteria;__Candidate_division_OP11;__c;__o;__f;__g                                                           | 0    | 0.19 | 0.15 | 0.66 | 0.22 | 78.55 |

|                                                                                                              |      |      |      |      |      |       |
|--------------------------------------------------------------------------------------------------------------|------|------|------|------|------|-------|
| Bacteria;__Proteobacteria;__Gammaproteobacteria;__Oceanospirillales;Other;Other                              | 0.3  | 0.11 | 0.15 | 1.4  | 0.22 | 78.77 |
| Bacteria;__Proteobacteria;__Gammaproteobacteria;__Oceanospirillales;__Oceanospirillaceae;__Neptunomonas      | 0.07 | 0.23 | 0.15 | 0.89 | 0.22 | 78.99 |
| Bacteria;__Firmicutes;__Clostridia;__Clostridiales;__Ruminococcaceae;__g                                     | 0    | 0.21 | 0.15 | 0.92 | 0.22 | 79.21 |
| Eukaryota;__Alveolata;__Protalveolata;__Syndiniales;__Amoebophrya;__                                         | 0.21 | 0    | 0.15 | 1.26 | 0.22 | 79.43 |
| Eukaryota;__Rhizaria;__Cercozoa;Other;Other;Other                                                            | 0    | 0.21 | 0.15 | 1.06 | 0.22 | 79.65 |
| Eukaryota;__Rhizaria;__Cercozoa;__Novel Clade 2;__;__                                                        | 0.21 | 0    | 0.15 | 0.96 | 0.22 | 79.87 |
| Bacteria;__Proteobacteria;__Gammaproteobacteria;__Order_Incertae_Sedis;__Family_Incertae_Sedis;__Marinicella | 0.18 | 0.15 | 0.15 | 1.16 | 0.22 | 80.09 |

#### Groups Atlas Pool & Brown Lagoon

Average dissimilarity = 81.70

| Species                                                                                                | Atlas Pool<br>Av.Abund | Brown<br>Lagoon<br>Av.Abund | Av.Diss | Diss/SD | Contrib% | Cum.% |
|--------------------------------------------------------------------------------------------------------|------------------------|-----------------------------|---------|---------|----------|-------|
| Bacteria;__Proteobacteria;__Alphaproteobacteria;__Sphingomonadales;__Sphingomonadaceae;__Sphingopyxis  | 0                      | 4.06                        | 4.01    | 2.03    | 4.91     | 4.91  |
| Bacteria;__Cyanobacteria;__Chloroplast;__Chloroplast;__Chloroplast;__Chloroplast                       | 3.27                   | 5.14                        | 3.67    | 1.42    | 4.5      | 9.41  |
| Eukaryota;__Alveolata;__Ciliophora;__Spirotrichea;__Hypotrichia;Other                                  | 3.49                   | 0.04                        | 3.46    | 2.66    | 4.24     | 13.65 |
| Bacteria;__Bacteroidetes;__Flavobacteria;__Flavobacteriales;__Flavobacteriaceae;__NS3a_marine_group    | 0                      | 3.07                        | 3.05    | 1.94    | 3.74     | 17.38 |
| Bacteria;__Actinobacteria;__Actinobacteria;__Frankiales;__Sporichthyaceae;__hgcI_clade                 | 2.32                   | 0                           | 2.48    | 0.91    | 3.04     | 20.42 |
| Bacteria;__Actinobacteria;__Actinobacteria;__Micrococcales;__Microbacteriaceae;Other                   | 1.99                   | 0                           | 2.07    | 1.15    | 2.53     | 22.94 |
| Eukaryota;__Chloroplastida;__Chlorophyceae;__Chlamydomonas;__;__                                       | 2.25                   | 0                           | 2.06    | 1.69    | 2.52     | 25.47 |
| Bacteria;__Bacteroidetes;__Flavobacteria;__Flavobacteriales;__Flavobacteriaceae;__Flavobacterium       | 2.2                    | 0.15                        | 1.92    | 2.27    | 2.34     | 27.81 |
| Bacteria;__Proteobacteria;__Betaproteobacteria;__Burkholderiales;__Burkholderiaceae;__Polynucleobacter | 1.75                   | 0                           | 1.84    | 1.05    | 2.25     | 30.06 |
| Eukaryota;__Chloroplastida;__Chlorophyceae;Other;Other;Other                                           | 1.85                   | 0                           | 1.68    | 1.5     | 2.05     | 32.11 |
| Bacteria;__Proteobacteria;__Betaproteobacteria;__Burkholderiales;__Comamonadaceae;Other                | 2.66                   | 3.08                        | 1.45    | 1.17    | 1.78     | 33.89 |
| Bacteria;__Proteobacteria;__Alphaproteobacteria;__Rhodobacterales;__Rhodobacteraceae;Other             | 1.03                   | 2.06                        | 1.39    | 1.09    | 1.7      | 35.59 |
| Eukaryota;__Chloroplastida;__Mamiellophyceae;__Micromonas;__;__                                        | 0                      | 1.27                        | 1.18    | 0.98    | 1.45     | 37.04 |
| Bacteria;__Proteobacteria;__Betaproteobacteria;Other;Other;Other                                       | 0.64                   | 1.33                        | 1.12    | 0.91    | 1.37     | 38.41 |
| Bacteria;__Actinobacteria;__Actinobacteria;__Frankiales;__Sporichthyaceae;Other                        | 1.02                   | 0                           | 1.08    | 0.93    | 1.33     | 39.74 |
| Bacteria;__Proteobacteria;__Betaproteobacteria;__Burkholderiales;__Alcaligenaceae;__Achromobacter      | 1.09                   | 0                           | 1.07    | 2.16    | 1.31     | 41.05 |
| Bacteria;__Proteobacteria;__Betaproteobacteria;__Burkholderiales;__Comamonadaceae;__Polaromonas        | 1.23                   | 0.12                        | 1.03    | 1.81    | 1.26     | 42.31 |

|                                                                                                              |      |      |      |      |      |       |
|--------------------------------------------------------------------------------------------------------------|------|------|------|------|------|-------|
| Eukaryota;__Rhizaria;__Cerczoza;__Endomyxa;__Novel Clade 10;__                                               | 1.09 | 0    | 1.03 | 2.14 | 1.26 | 43.57 |
| Bacteria;__Actinobacteria;__Acidimicrobiia;__Acidimicrobiales;__Acidimicrobiaceae;__g                        | 0.04 | 0.99 | 0.94 | 2.67 | 1.15 | 44.72 |
| Bacteria;__Proteobacteria;__Betaproteobacteria;__Burkholderiales;__Comamonadaceae;__Simplicispira            | 0.91 | 0    | 0.84 | 2.04 | 1.02 | 45.75 |
| Bacteria;__Proteobacteria;__Alphaproteobacteria;__Sphingomonadales;__Erythrobacteraceae;__Altererythrobacter | 0    | 0.78 | 0.78 | 1.35 | 0.95 | 46.7  |
| Bacteria;__Actinobacteria;__Actinobacteria;__PeM15;__f;__g                                                   | 0.79 | 0.15 | 0.69 | 1.08 | 0.85 | 47.55 |
| Eukaryota;__Fungi;__Chytridiomycota;__;__;__                                                                 | 0.86 | 0.09 | 0.69 | 1.57 | 0.85 | 48.4  |
| Bacteria;__Bacteroidetes;__Flavobacteria;__Flavobacteriales;__Flavobacteriaceae;__Polaribacter               | 0    | 0.68 | 0.67 | 3.86 | 0.82 | 49.22 |
| Eukaryota;__Cryptophyceae;__Cryptomonadales;__Geminigera;__;__                                               | 0    | 0.66 | 0.65 | 0.79 | 0.8  | 50.02 |
| Bacteria;__Proteobacteria;__Betaproteobacteria;__Burkholderiales;__Comamonadaceae;__Paucibacter              | 0.61 | 0    | 0.57 | 1.82 | 0.7  | 50.71 |
| Bacteria;__Candidate_division_OP11;__c;__o;__f;__g                                                           | 0.55 | 0.04 | 0.56 | 0.83 | 0.68 | 51.4  |
| Eukaryota;__Rhizaria;__Cerczoza;__Endomyxa;__Phytomyxea;__Spongospora                                        | 0.59 | 0    | 0.54 | 2.66 | 0.67 | 52.06 |
| Bacteria;__Actinobacteria;__Actinobacteria;__Micrococcales;__Microbacteriaceae;__Candidatus_Aquiluna         | 0.53 | 0    | 0.54 | 1.38 | 0.66 | 52.73 |
| Eukaryota;__Stramenopiles;__Diatomea;__Bacillariophytina;__Mediophyceae;Other                                | 0.58 | 0    | 0.52 | 1.33 | 0.64 | 53.37 |
| Eukaryota;__Cryptophyceae;__Cryptomonadales;__Rhodomonas;__;__                                               | 0    | 0.5  | 0.5  | 0.7  | 0.61 | 53.97 |
| Bacteria;__Proteobacteria;__Alphaproteobacteria;__Rhodobacterales;__Rhodobacteraceae;__Loktanella            | 0    | 0.49 | 0.49 | 4.95 | 0.6  | 54.57 |
| Unassigned;Other;Other;Other;Other;Other                                                                     | 1.1  | 0.73 | 0.47 | 1.61 | 0.57 | 55.14 |
| Bacteria;__Actinobacteria;__Actinobacteria;__Micrococcales;__Microbacteriaceae;__Candidatus_Limnoluna        | 0.45 | 0    | 0.47 | 1.17 | 0.57 | 55.71 |
| Bacteria;__Proteobacteria;__Betaproteobacteria;__Burkholderiales;__Alcaligenaceae;Other                      | 0.57 | 0.15 | 0.42 | 1.68 | 0.51 | 56.23 |
| Bacteria;__Proteobacteria;__Gammaproteobacteria;__Pseudomonadales;__Moraxellaceae;__Psychrobacter            | 0.5  | 0.1  | 0.41 | 1.65 | 0.5  | 56.72 |
| Bacteria;__Proteobacteria;__Betaproteobacteria;__Burkholderiales;__Comamonadaceae;__g                        | 0.45 | 0.07 | 0.4  | 1.39 | 0.49 | 57.22 |
| Eukaryota;__Chloroplastida;__Trebouxiophyceae;__;__;__                                                       | 0.4  | 0    | 0.38 | 2.06 | 0.46 | 57.68 |
| Bacteria;__Bacteroidetes;__Cytophagia;__Cytophagales;__Cytophagaceae;__Leadbetterella                        | 0.14 | 0.5  | 0.37 | 1.07 | 0.46 | 58.13 |
| Bacteria;__Proteobacteria;__Deltaproteobacteria;__Myxococcales;__0319-6G20;__g                               | 0.41 | 0.04 | 0.36 | 2.13 | 0.44 | 58.57 |
| Bacteria;__Proteobacteria;__Gammaproteobacteria;__Xanthomonadales;__Xanthomonadaceae;__Arenimonas            | 0.38 | 0    | 0.36 | 2.16 | 0.44 | 59.02 |
| Eukaryota;__Stramenopiles;__T53A1;__;__;__                                                                   | 0.37 | 0    | 0.35 | 2.02 | 0.43 | 59.44 |
| Bacteria;__Proteobacteria;__Alphaproteobacteria;__Rickettsiales;__mitochondria;__g                           | 0.37 | 0    | 0.34 | 1.74 | 0.42 | 59.86 |
| Eukaryota;__Stramenopiles;__Bicosoecida;__Siluaniiidae;__Siluania;__                                         | 0.36 | 0    | 0.34 | 1.81 | 0.41 | 60.28 |
| Bacteria;__Proteobacteria;__Betaproteobacteria;__Burkholderiales;__Oxalobacteraceae;__Undibacterium          | 0.36 | 0    | 0.33 | 1.8  | 0.41 | 60.68 |
| Eukaryota;__Alveolata;__Ciliophora;__Spirotrichea;__Hypotrichia;__Gonostomum                                 | 0.29 | 0    | 0.32 | 0.66 | 0.4  | 61.08 |
| Bacteria;__Proteobacteria;__Betaproteobacteria;__Burkholderiales;Other;Other                                 | 0.38 | 0.16 | 0.3  | 0.85 | 0.37 | 61.45 |
| Bacteria;__Proteobacteria;__Alphaproteobacteria;__Rhodobacterales;__Rhodobacteraceae;__g                     | 0.03 | 0.35 | 0.3  | 2.26 | 0.37 | 61.82 |
| Eukaryota;__Alveolata;__Protalveolata;__Colpodellida;Other;Other                                             | 0.33 | 0    | 0.3  | 1.25 | 0.37 | 62.19 |

|                                                                                                         |      |      |      |      |      |       |
|---------------------------------------------------------------------------------------------------------|------|------|------|------|------|-------|
| Bacteria;__Proteobacteria;__Betaproteobacteria;__Burkholderiales;__Comamonadaceae;__Albidiferax         | 0.3  | 0    | 0.29 | 7.38 | 0.36 | 62.55 |
| Bacteria;__Bacteroidetes;__Bacteroidia;__Bacteroidales;__Bacteroidaceae;__Bacteroides                   | 0.31 | 0.28 | 0.29 | 1.46 | 0.36 | 62.9  |
| Bacteria;__Actinobacteria;__Actinobacteria;__Micrococcales;__Microbacteriaceae;__Candidatus_Planktoluna | 0.28 | 0    | 0.29 | 1.05 | 0.36 | 63.26 |
| Bacteria;__Proteobacteria;__Gammaproteobacteria;__BD7-8_marine_group;__f;__g                            | 0    | 0.29 | 0.28 | 2.66 | 0.35 | 63.6  |
| Bacteria;__Firmicutes;__Clostridia;__Clostridiales;__Ruminococcaceae;__g                                | 0.35 | 0.19 | 0.27 | 1.45 | 0.34 | 63.94 |
| Bacteria;__Fusobacteria;__Fusobacteria;__Fusobacteriales;__Fusobacteriaceae;__Fusobacterium             | 0.36 | 0.22 | 0.27 | 1.37 | 0.33 | 64.27 |
| Bacteria;__Proteobacteria;__Alphaproteobacteria;__Rhodobacterales;__Rhodobacteraceae;__Rhodobacter      | 0.33 | 0.17 | 0.26 | 1.77 | 0.32 | 64.6  |
| Bacteria;__Bacteroidetes;__Sphingobacteriia;__Sphingobacteriales;__NS11-12_marine_group;__g             | 0.41 | 0.17 | 0.26 | 1.36 | 0.32 | 64.92 |
| Bacteria;__Proteobacteria;__Gammaproteobacteria;__Alteromonadales;__Pseudoalteromonadaceae;__g          | 0    | 0.29 | 0.26 | 0.66 | 0.32 | 65.24 |
| Archaea;__Euryarchaeota;__Halobacteria;__Halobacteriales;__Deep_Sea_Hydrothermal_Vent_Gp_6(DHVEG-6);__g | 0.29 | 0.09 | 0.26 | 0.83 | 0.32 | 65.55 |
| Bacteria;__Proteobacteria;__Gammaproteobacteria;__Pseudomonadales;__Moraxellaceae;__Perlucidibaca       | 0.27 | 0    | 0.25 | 2.16 | 0.31 | 65.86 |
| Eukaryota;__Stramenopiles;__Chrysophyceae;__Chromulinales;__Phaeoplaca;__                               | 0.26 | 0    | 0.25 | 6.7  | 0.31 | 66.17 |
| Eukaryota;__Alveolata;__Ciliophora;__Conthreep;__Prostomatea;__Cryptocaryon                             | 0.26 | 0    | 0.25 | 4.02 | 0.31 | 66.47 |
| Eukaryota;__Alveolata;__Ciliophora;__Conthreep;__Oligohymenophorea;Other                                | 0.27 | 0    | 0.25 | 1.12 | 0.3  | 66.77 |
| Bacteria;__Proteobacteria;__Gammaproteobacteria;__Oceanospirillales;__oc58;__g                          | 0.27 | 0    | 0.25 | 1.33 | 0.3  | 67.07 |
| Bacteria;__Bacteroidetes;__Sphingobacteriia;__Sphingobacteriales;__Chitinophagaceae;__g                 | 0.28 | 0.07 | 0.24 | 1.29 | 0.3  | 67.37 |
| Bacteria;__Proteobacteria;__Betaproteobacteria;__Burkholderiales;__Comamonadaceae;__Hydrogenophaga      | 0.26 | 0    | 0.24 | 1.1  | 0.29 | 67.66 |
| Bacteria;__Candidate_division_TM7;__c;__o;__f;__g                                                       | 0.23 | 0    | 0.24 | 1.66 | 0.29 | 67.95 |
| Bacteria;__Bacteroidetes;__Sphingobacteriia;__Sphingobacteriales;__Chitinophagaceae;__Filimonas         | 0.26 | 0    | 0.24 | 1.21 | 0.29 | 68.25 |
| Eukaryota;__Chloroplastida;__Chlorophyceae;__Desmodesmus;__;__                                          | 0.27 | 0.02 | 0.24 | 1.41 | 0.29 | 68.54 |
| Bacteria;__Proteobacteria;__Alphaproteobacteria;__SAR11_clade;__Chesapeake-Delaware_Bay;__g             | 0    | 0.23 | 0.24 | 0.76 | 0.29 | 68.83 |
| Bacteria;__Proteobacteria;__Betaproteobacteria;__Burkholderiales;__Burkholderiaceae;__Ralstonia         | 0.23 | 0    | 0.23 | 1.08 | 0.29 | 69.11 |
| Eukaryota;__Cryptophyceae;__Cryptomonadales;__Teleaulax;__;__                                           | 0    | 0.23 | 0.22 | 0.66 | 0.27 | 69.39 |
| Bacteria;__Proteobacteria;__Betaproteobacteria;__Burkholderiales;__Alcaligenaceae;__Pusillimonas        | 0.2  | 0    | 0.22 | 0.66 | 0.27 | 69.66 |
| Bacteria;__Bacteroidetes;__Sphingobacteriia;__Sphingobacteriales;__WCHB1-69;__g                         | 0.24 | 0    | 0.22 | 1.18 | 0.27 | 69.93 |
| Eukaryota;__Metazoa;__Arthropoda;__Maxillopoda;__;__                                                    | 0.24 | 0.02 | 0.22 | 2.92 | 0.27 | 70.2  |
| Bacteria;__Proteobacteria;__Betaproteobacteria;__Rhodocyclales;__Rhodocyclaceae;__Dechloromonas         | 0.23 | 0    | 0.22 | 2.94 | 0.27 | 70.46 |
| Bacteria;__Proteobacteria;__Alphaproteobacteria;__Rhodospirillales;__Rhodospirillaceae;__Thalassospira  | 0    | 0.22 | 0.21 | 3    | 0.26 | 70.72 |
| Bacteria;__Actinobacteria;__Actinobacteria;__Micrococcales;__Microbacteriaceae;__Alpinimonas            | 0.19 | 0    | 0.21 | 0.66 | 0.26 | 70.98 |
| Bacteria;__Bacteroidetes;__Flavobacteria;__Flavobacteriales;__Flavobacteriaceae;Other                   | 0.03 | 0.22 | 0.2  | 1.37 | 0.25 | 71.23 |
| Eukaryota;__Chloroplastida;__Chlorophyceae;__;__;__                                                     | 0.22 | 0    | 0.2  | 1.16 | 0.25 | 71.48 |

|                                                                                                                               |      |      |      |      |      |       |
|-------------------------------------------------------------------------------------------------------------------------------|------|------|------|------|------|-------|
| Bacteria;__Proteobacteria;__Deltaproteobacteria;__Bdellovibrionales;__Bacteriovoraceae;__Bacteriovorax                        | 0.24 | 0.08 | 0.2  | 1.39 | 0.24 | 71.72 |
| Bacteria;__WCHB1-60;__c;__o;__f;__g                                                                                           | 0.18 | 0.04 | 0.2  | 0.86 | 0.24 | 71.96 |
| Bacteria;__Proteobacteria;__Gammaproteobacteria;__Enterobacteriales;__Enterobacteriaceae;Other                                | 0.07 | 0.17 | 0.19 | 0.98 | 0.24 | 72.19 |
| Bacteria;__Proteobacteria;__Gammaproteobacteria;__Xanthomonadales;__Xanthomonadaceae;Other                                    | 0.21 | 0    | 0.19 | 1.13 | 0.23 | 72.43 |
| Archaea;__Thaumarchaeota;__Marine_Group_I;__o;__f;__g                                                                         | 0    | 0.19 | 0.19 | 1.3  | 0.23 | 72.66 |
| Archaea;__Euryarchaeota;__Halobacteria;__Halobacteriales;__Deep_Sea_Hydrothermal_Vent_Gp_6(DHVEG-6);__Candidatus_Parvarchaeum | 0.19 | 0.1  | 0.19 | 1.02 | 0.23 | 72.89 |
| Bacteria;__Proteobacteria;__Gammaproteobacteria;__Alteromonadales;__Colwelliaceae;__Colwellia                                 | 0.05 | 0.19 | 0.19 | 0.8  | 0.23 | 73.11 |
| Bacteria;__Proteobacteria;__Betaproteobacteria;__Burkholderiales;__Comamonadaceae;__BAL58_marine_group                        | 0    | 0.18 | 0.18 | 0.86 | 0.23 | 73.34 |
| Archaea;__Euryarchaeota;__Methanomicrobia;__Methanomicrobiales;__Methanoregulaceae;__Methanoregula                            | 0.19 | 0    | 0.18 | 2.03 | 0.22 | 73.56 |
| Bacteria;__Candidate_division_OD1;__c;__o;__f;__g                                                                             | 0.2  | 0.02 | 0.18 | 1.4  | 0.22 | 73.78 |
| Eukaryota;__Rhizaria;__Cercozoa;Other;Other;Other                                                                             | 0.19 | 0    | 0.17 | 1.28 | 0.21 | 73.99 |
| Eukaryota;__Fungi;__Blastocladiomycota;__;__;__                                                                               | 0.19 | 0    | 0.17 | 1.17 | 0.21 | 74.2  |
| Bacteria;__Firmicutes;__Bacilli;__Bacillales;__Staphylococcaceae;Other                                                        | 0.2  | 0.04 | 0.17 | 1.49 | 0.21 | 74.41 |
| Bacteria;__Proteobacteria;__Gammaproteobacteria;__Xanthomonadales;__Sinobacteraceae;__g                                       | 0.17 | 0    | 0.17 | 4.66 | 0.2  | 74.61 |
| Bacteria;__Proteobacteria;__Deltaproteobacteria;__Syntrophobacteriales;__Syntrophaceae;__Smithella                            | 0.17 | 0    | 0.16 | 6.52 | 0.2  | 74.81 |
| Bacteria;__Proteobacteria;__Alphaproteobacteria;__SAR11_clade;__Surface_1;__g                                                 | 0    | 0.17 | 0.16 | 1.31 | 0.2  | 75.02 |
| Bacteria;__Bacteroidetes;__Flavobacteria;__Flavobacteriales;__Flavobacteriaceae;__Chryseobacterium                            | 0.18 | 0    | 0.16 | 1.32 | 0.2  | 75.22 |
| Bacteria;__Proteobacteria;__Betaproteobacteria;__Burkholderiales;__Comamonadaceae;__Pelomonas                                 | 0.17 | 0    | 0.16 | 1.06 | 0.2  | 75.41 |
| Bacteria;__Proteobacteria;__Betaproteobacteria;__Burkholderiales;__Comamonadaceae;__Acidovorax                                | 0.13 | 0.29 | 0.16 | 1.09 | 0.2  | 75.61 |
| Bacteria;__Proteobacteria;__Gammaproteobacteria;__Alteromonadales;__Alteromonadaceae;__BD1-7_clade                            | 0.18 | 0    | 0.16 | 1.3  | 0.19 | 75.8  |
| Bacteria;__Bacteroidetes;__Sphingobacteriia;__Sphingobacteriales;__Chitinophagaceae;__Ferruginibacter                         | 0.17 | 0    | 0.16 | 1.28 | 0.19 | 75.99 |
| Bacteria;__Bacteroidetes;__vadinHA17;__o;__f;__g                                                                              | 0.16 | 0    | 0.15 | 2.95 | 0.19 | 76.18 |
| Bacteria;__Bacteroidetes;__Bacteroidia;__Bacteroidales;__Prevotellaceae;__Prevotella                                          | 0.19 | 0.09 | 0.15 | 1.32 | 0.19 | 76.36 |
| Eukaryota;__Fungi;Other;Other;Other;Other                                                                                     | 0.17 | 0    | 0.15 | 1.31 | 0.19 | 76.55 |
| Bacteria;__Actinobacteria;Other;Other;Other;Other                                                                             | 0.15 | 0    | 0.15 | 1.01 | 0.18 | 76.74 |
| Bacteria;__Bacteroidetes;__Bacteroidia;__Bacteroidales;__Rikenellaceae;__Alistipes                                            | 0.17 | 0    | 0.15 | 1.06 | 0.18 | 76.92 |
| Eukaryota;__Alveolata;__Dinoflagellata;__Dinophyceae;__Gymnodiniphyceidae;__FV18-2D9                                          | 0.16 | 0    | 0.15 | 1.29 | 0.18 | 77.1  |
| Eukaryota;__Stramenopiles;__Eustigmatales;__Nannochloropsis;__;__                                                             | 0.16 | 0    | 0.15 | 1.32 | 0.18 | 77.28 |
| Eukaryota;__Stramenopiles;__CCI40;__;__;__                                                                                    | 0.16 | 0    | 0.15 | 1.28 | 0.18 | 77.45 |
| Bacteria;__Bacteroidetes;__Sphingobacteriia;__Sphingobacteriales;__Sphingobacteriaceae;__Pedobacter                           | 0.17 | 0    | 0.14 | 0.87 | 0.18 | 77.63 |
| Eukaryota;Other;Other;Other;Other;Other                                                                                       | 0.09 | 0.17 | 0.14 | 1.04 | 0.18 | 77.81 |



|                                                                                                                           |      |      |      |      |      |       |
|---------------------------------------------------------------------------------------------------------------------------|------|------|------|------|------|-------|
| Eukaryota;__Stramenopiles;__Pirsonia;__;_;                                                                                | 0    | 0.16 | 0.14 | 0.66 | 0.18 | 77.98 |
| Bacteria;__Firmicutes;__Bacilli;__Lactobacillales;__Carnobacteriaceae;__Atopostipes                                       | 0.16 | 0    | 0.14 | 1.27 | 0.17 | 78.16 |
| Bacteria;__Proteobacteria;__Gammaproteobacteria;__Oceanospirillales;__SAR86_clade;__g                                     | 0    | 0.16 | 0.14 | 0.66 | 0.17 | 78.33 |
| Bacteria;__Proteobacteria;__Alphaproteobacteria;__Kordiimonadales;__Kordiimonadaceae;__Kordiimonas                        | 0    | 0.15 | 0.14 | 1.3  | 0.17 | 78.5  |
| Bacteria;__Proteobacteria;__Gammaproteobacteria;__Pseudomonadales;__Pseudomonadaceae;__Pseudomonas                        | 0.12 | 0.2  | 0.14 | 1.16 | 0.17 | 78.67 |
| Eukaryota;__Alveolata;__Protalveolata;__Perkinsidae;__NA2-2D10;__                                                         | 0    | 0.15 | 0.14 | 0.66 | 0.17 | 78.84 |
| Bacteria;__Proteobacteria;__Betaproteobacteria;__Nitrosomonadales;__Gallionellaceae;__Gallionella                         | 0.03 | 0.14 | 0.14 | 1    | 0.17 | 79.01 |
| Bacteria;__Cyanobacteria;__Cyanobacteria;__SubsectionIII;__FamilyI;__g                                                    | 0.14 | 0    | 0.13 | 1.06 | 0.16 | 79.17 |
| Bacteria;__Proteobacteria;__Betaproteobacteria;__Burkholderiales;__Comamonadaceae;__Comamonas                             | 0.15 | 0    | 0.13 | 1.29 | 0.16 | 79.33 |
| Eukaryota;__Chloroplastida;__Ulvophyceae;Other;Other;Other                                                                | 0    | 0.13 | 0.13 | 0.96 | 0.16 | 79.49 |
| Bacteria;__Proteobacteria;__Alphaproteobacteria;__Rhodobacterales;__Rhodobacteraceae;__Roseobacter_clade_DC5-80-3_lineage | 0    | 0.14 | 0.13 | 0.66 | 0.16 | 79.65 |
| Bacteria;__Proteobacteria;__Betaproteobacteria;__Burkholderiales;__Comamonadaceae;__Limnohabitans                         | 0.09 | 0.1  | 0.13 | 1.33 | 0.16 | 79.81 |
| Bacteria;__Cyanobacteria;__Cyanobacteria;__SubsectionIII;__FamilyI;__Chamaesiphon                                         | 0.13 | 0    | 0.13 | 2.05 | 0.16 | 79.96 |
| Bacteria;__Firmicutes;__Bacilli;__Lactobacillales;__Aerococcaceae;__Globicatella                                          | 0.14 | 0    | 0.13 | 1.04 | 0.15 | 80.12 |

#### Groups Seal Pool & Brown Lagoon

Average dissimilarity = 82.85

| Species                                                                                                | Seal Pool<br>Av.Abund | Brown<br>Lagoon<br>Av.Abund | Av.Diss | Diss/SD | Contrib% | Cum.% |
|--------------------------------------------------------------------------------------------------------|-----------------------|-----------------------------|---------|---------|----------|-------|
| Bacteria;__Cyanobacteria;__Chloroplast;__Chloroplast;__Chloroplast;__Chloroplast                       | 0.84                  | 5.14                        | 4.13    | 1.46    | 4.98     | 4.98  |
| Bacteria;__Proteobacteria;__Alphaproteobacteria;__Sphingomonadales;__Sphingomonadaceae;__Sphingopyxis  | 0.02                  | 4.06                        | 3.74    | 2.12    | 4.51     | 9.49  |
| Bacteria;__Actinobacteria;__Actinobacteria;__PeM15;__f;__g                                             | 3.86                  | 0.15                        | 3.44    | 1.58    | 4.16     | 13.65 |
| Bacteria;__Bacteroidetes;__Flavobacteria;__Flavobacteriales;__Flavobacteriaceae;__NS3a_marine_group    | 0                     | 3.07                        | 2.86    | 2.02    | 3.45     | 17.1  |
| Bacteria;__Bacteroidetes;__Flavobacteria;__Flavobacteriales;__Flavobacteriaceae;__Flavobacterium       | 3.15                  | 0.15                        | 2.7     | 1.85    | 3.26     | 20.36 |
| Bacteria;__Proteobacteria;__Betaproteobacteria;__Burkholderiales;__Burkholderiaceae;__Polynucleobacter | 2.03                  | 0                           | 1.91    | 1.17    | 2.31     | 22.67 |
| Bacteria;__Proteobacteria;__Betaproteobacteria;__Burkholderiales;__Comamonadaceae;__Polaromonas        | 2                     | 0.12                        | 1.7     | 2.16    | 2.05     | 24.72 |
| Bacteria;__Proteobacteria;__Alphaproteobacteria;__Rhodobacterales;__Rhodobacteraceae;Other             | 1.79                  | 2.06                        | 1.47    | 1.35    | 1.77     | 26.49 |

|                                                                                                              |      |      |      |       |      |       |
|--------------------------------------------------------------------------------------------------------------|------|------|------|-------|------|-------|
| Bacteria;__Actinobacteria;__Actinobacteria;__Frankiales;__Sporichthyaceae;__hgcI_clade                       | 1.22 | 0    | 1.15 | 1.07  | 1.39 | 27.87 |
| Bacteria;__Proteobacteria;__Betaproteobacteria;__Burkholderiales;__Comamonadaceae;Other                      | 2.78 | 3.08 | 1.14 | 1.34  | 1.38 | 29.25 |
| Bacteria;__Proteobacteria;__Betaproteobacteria;__Burkholderiales;__Comamonadaceae;__Simplicispira            | 1.25 | 0    | 1.12 | 1.69  | 1.35 | 30.6  |
| Eukaryota;__Chloroplastida;__Mamiellophyceae;__Micromonas;__;__                                              | 0    | 1.27 | 1.11 | 0.99  | 1.34 | 31.95 |
| Bacteria;__Actinobacteria;__Actinobacteria;__Micrococcales;__Microbacteriaceae;Other                         | 1.18 | 0    | 1.11 | 1.34  | 1.34 | 33.28 |
| Bacteria;__Proteobacteria;__Betaproteobacteria;Other;Other;Other                                             | 0.54 | 1.33 | 1    | 0.8   | 1.21 | 34.49 |
| Eukaryota;__Rhizaria;__Cercozoa;__Thecofilosea;Other;Other                                                   | 1.1  | 0    | 0.99 | 1.78  | 1.2  | 35.69 |
| Bacteria;__Bacteroidetes;__Sphingobacteriia;__Sphingobacteriales;__Sphingobacteriaceae;__Pedobacter          | 1.06 | 0    | 0.98 | 1.95  | 1.18 | 36.86 |
| Bacteria;__Proteobacteria;__Betaproteobacteria;__Burkholderiales;__Comamonadaceae;__g                        | 1.15 | 0.07 | 0.97 | 1.29  | 1.17 | 38.04 |
| Bacteria;__Bacteroidetes;__Sphingobacteriia;__Sphingobacteriales;__Chitinophagaceae;__Sediminibacterium      | 1.15 | 0.09 | 0.96 | 2.31  | 1.16 | 39.2  |
| Bacteria;__Actinobacteria;__Actinobacteria;__Frankiales;__Sporichthyaceae;Other                              | 1.02 | 0    | 0.96 | 1.05  | 1.16 | 40.36 |
| Eukaryota;__Chloroplastida;__Chlorophyceae;__Desmodesmus;__;__                                               | 1.02 | 0.02 | 0.9  | 1.09  | 1.09 | 41.45 |
| Bacteria;__Proteobacteria;__Betaproteobacteria;__Burkholderiales;__Comamonadaceae;__Paucibacter              | 0.97 | 0    | 0.87 | 1.24  | 1.05 | 42.5  |
| Bacteria;__Bacteroidetes;__Sphingobacteriia;__Sphingobacteriales;__NS11-12_marine_group;__g                  | 1.14 | 0.17 | 0.87 | 1.23  | 1.05 | 43.54 |
| Bacteria;__Actinobacteria;__Acidimicrobiia;__Acidimicrobiales;__Acidimicrobiaceae;__g                        | 0.13 | 0.99 | 0.8  | 2.51  | 0.96 | 44.51 |
| Bacteria;__Bacteroidetes;__Sphingobacteriia;__Sphingobacteriales;__Chitinophagaceae;__Ferruginibacter        | 0.86 | 0    | 0.77 | 1.53  | 0.93 | 45.44 |
| Bacteria;__Proteobacteria;__Alphaproteobacteria;__Sphingomonadales;__Erythrobacteraceae;__Altererythrobacter | 0    | 0.78 | 0.73 | 1.38  | 0.88 | 46.32 |
| Bacteria;__Actinobacteria;Other;Other;Other;Other                                                            | 0.78 | 0    | 0.73 | 1.66  | 0.88 | 47.2  |
| Bacteria;__Bacteroidetes;__Flavobacteria;__Flavobacteriales;__Cryomorphaceae;__Fluviicola                    | 0.9  | 0.14 | 0.69 | 2.32  | 0.83 | 48.03 |
| Bacteria;__Proteobacteria;__Betaproteobacteria;__Burkholderiales;__Comamonadaceae;__Albidiferax              | 0.77 | 0    | 0.69 | 1.48  | 0.83 | 48.86 |
| Bacteria;__Proteobacteria;__Gammaproteobacteria;__Pseudomonadales;__Moraxellaceae;__Perlucidibaca            | 0.76 | 0    | 0.68 | 2.84  | 0.83 | 49.69 |
| Bacteria;__Bacteroidetes;__Sphingobacteriia;__Sphingobacteriales;__Saprospiraceae;__g                        | 0.76 | 0.04 | 0.66 | 0.93  | 0.8  | 50.48 |
| Bacteria;__Candidate_division_OP11;__c;__o;__f;__g                                                           | 0.72 | 0.04 | 0.64 | 1.12  | 0.77 | 51.26 |
| Bacteria;__Proteobacteria;__Alphaproteobacteria;__Rhodospirillales;__Acetobacteraceae;__Roseococcus          | 0.71 | 0    | 0.64 | 1.39  | 0.77 | 52.02 |
| Bacteria;__Proteobacteria;__Betaproteobacteria;__Burkholderiales;__Alcaligenaceae;__Achromobacter            | 0.67 | 0    | 0.62 | 2.45  | 0.75 | 52.77 |
| Eukaryota;__Cryptophyceae;__Cryptomonadales;__Geminigera;__;__                                               | 0    | 0.66 | 0.61 | 0.8   | 0.74 | 53.51 |
| Bacteria;__Bacteroidetes;__Sphingobacteriia;__Sphingobacteriales;__Chitinophagaceae;__g                      | 0.71 | 0.07 | 0.6  | 1.19  | 0.72 | 54.24 |
| Bacteria;__Actinobacteria;__Actinobacteria;__Micrococcales;__Microbacteriaceae;__Candidatus_Aquiluna         | 0.62 | 0    | 0.57 | 1.62  | 0.69 | 54.93 |
| Bacteria;__Bacteroidetes;__Flavobacteria;__Flavobacteriales;__Flavobacteriaceae;__Polaribacter               | 0.06 | 0.68 | 0.57 | 3.28  | 0.69 | 55.62 |
| Archaea;__Euryarchaeota;__Methanomicrobia;__Methanomicrobiales;__Methanoregulaceae;__Methanoregula           | 0.61 | 0    | 0.56 | 13.97 | 0.68 | 56.29 |
| Eukaryota;__Fungi;__Chytridiomycota;__;__;__                                                                 | 0.63 | 0.09 | 0.52 | 1.19  | 0.62 | 56.92 |

|                                                                                                           |      |      |      |      |      |       |
|-----------------------------------------------------------------------------------------------------------|------|------|------|------|------|-------|
| Bacteria;__Proteobacteria;__Alphaproteobacteria;__Sphingomonadales;__Sphingomonadaceae;__Novosphingobium  | 0.68 | 0.11 | 0.51 | 1.72 | 0.62 | 57.53 |
| Eukaryota;__Cryptophyceae;__Cryptomonadales;__Rhodomonas;__;__                                            | 0    | 0.5  | 0.47 | 0.71 | 0.56 | 58.1  |
| Bacteria;__Actinobacteria;__Acidimicrobiia;__Acidimicrobiales;__Acidimicrobiaceae;__CL500-29_marine_group | 0.49 | 0    | 0.46 | 0.97 | 0.56 | 58.66 |
| Bacteria;__Proteobacteria;__Alphaproteobacteria;__Rhodobacterales;__Rhodobacteraceae;__Loktanella         | 0    | 0.49 | 0.46 | 6.25 | 0.55 | 59.21 |
| Bacteria;__Proteobacteria;__Betaproteobacteria;__Burkholderiales;__Alcaligenaceae;Other                   | 0.64 | 0.15 | 0.44 | 1.81 | 0.54 | 59.74 |
| Bacteria;__Proteobacteria;__Gammaproteobacteria;__Pseudomonadales;__Moraxellaceae;__Psychrobacter         | 0.53 | 0.1  | 0.42 | 1.8  | 0.5  | 60.24 |
| Bacteria;__Bacteroidetes;__Cytophagia;__Cytophagales;__Cytophagaceae;__Leadbetterella                     | 0.5  | 0.5  | 0.4  | 1.27 | 0.49 | 60.73 |
| Bacteria;__Bacteroidetes;__Sphingobacteriia;__Sphingobacteriales;__WCHB1-69;__g                           | 0.44 | 0    | 0.39 | 1.14 | 0.48 | 61.2  |
| Bacteria;__Candidate_division_TM7;__c;__o;__f;__g                                                         | 0.41 | 0    | 0.39 | 0.84 | 0.48 | 61.68 |
| Bacteria;__Proteobacteria;__Deltaproteobacteria;__Bdellovibrionales;__Bacteriovoracaceae;__Bacteriovorax  | 0.5  | 0.08 | 0.38 | 2.8  | 0.46 | 62.14 |
| Bacteria;__Actinobacteria;__Acidimicrobiia;__Acidimicrobiales;__uncultured;__g                            | 0.41 | 0    | 0.38 | 2.92 | 0.45 | 62.59 |
| Bacteria;__Bacteroidetes;__Sphingobacteriia;__Sphingobacteriales;__Chitinophagaceae;__Filimonas           | 0.42 | 0    | 0.38 | 0.94 | 0.45 | 63.05 |
| Archaea;__Euryarchaeota;__Halobacteria;__Halobacteriales;__Deep_Sea_Hydrothermal_Vent_Gp_6(DHVEG-6);__g   | 0.41 | 0.09 | 0.36 | 0.98 | 0.44 | 63.49 |
| Bacteria;__Proteobacteria;__Gammaproteobacteria;__Oceanospirillales;__oc58;__g                            | 0.39 | 0    | 0.36 | 2.16 | 0.43 | 63.92 |
| Unassigned;Other;Other;Other;Other;Other                                                                  | 0.91 | 0.73 | 0.36 | 1.21 | 0.43 | 64.35 |
| Bacteria;__WCHB1-60;__c;__o;__f;__g                                                                       | 0.37 | 0.04 | 0.34 | 0.8  | 0.41 | 64.76 |
| Bacteria;__Proteobacteria;__Betaproteobacteria;__Burkholderiales;Other;Other                              | 0.53 | 0.16 | 0.33 | 1.8  | 0.4  | 65.16 |
| Bacteria;__Verrucomicrobia;__Opitutae;__Opitiales;__Opitutaceae;__Opitutus                                | 0.36 | 0    | 0.32 | 1.49 | 0.39 | 65.55 |
| Bacteria;__Proteobacteria;__Alphaproteobacteria;__Rhodobacterales;__Rhodobacteraceae;__g                  | 0    | 0.35 | 0.32 | 2.91 | 0.38 | 65.93 |
| Bacteria;__Gemmatimonadetes;__Gemmatimonadetes;__Gemmatimonadales;__Gemmatimonadaceae;__Gemmatimonas      | 0.35 | 0    | 0.31 | 1.72 | 0.38 | 66.31 |
| Bacteria;__Bacteroidetes;__vadinHA17;__o;__f;__g                                                          | 0.34 | 0    | 0.31 | 2.55 | 0.37 | 66.68 |
| Bacteria;__Candidate_division_OD1;__c;__o;__f;__g                                                         | 0.3  | 0.02 | 0.3  | 0.71 | 0.36 | 67.03 |
| Bacteria;__Proteobacteria;__Deltaproteobacteria;__Myxococcales;__0319-6G20;__g                            | 0.36 | 0.04 | 0.29 | 1.36 | 0.35 | 67.39 |
| Bacteria;__Proteobacteria;__Gammaproteobacteria;__BD7-8_marine_group;__f;__g                              | 0    | 0.29 | 0.27 | 2.85 | 0.32 | 67.71 |
| Bacteria;__Fusobacteria;__Fusobacteria;__Fusobacteriales;__Fusobacteriaceae;__Fusobacterium               | 0.38 | 0.22 | 0.27 | 1.34 | 0.32 | 68.03 |
| Bacteria;__Proteobacteria;__Betaproteobacteria;__Burkholderiales;__Comamonadaceae;__Acidovorax            | 0.38 | 0.29 | 0.26 | 1.92 | 0.31 | 68.34 |
| Bacteria;__Proteobacteria;__Gammaproteobacteria;__Alteromonadales;__Alteromonadaceae;__BD1-7_clade        | 0.29 | 0    | 0.26 | 1.52 | 0.31 | 68.65 |
| Bacteria;__Proteobacteria;__Betaproteobacteria;__Burkholderiales;__Comamonadaceae;__Rhizobacter           | 0.28 | 0    | 0.26 | 2.45 | 0.31 | 68.96 |
| Bacteria;__Proteobacteria;__Betaproteobacteria;__Burkholderiales;__Oxalobacteraceae;__Undibacterium       | 0.28 | 0    | 0.25 | 3.35 | 0.31 | 69.26 |

|                                                                                                                               |      |      |      |      |      |       |
|-------------------------------------------------------------------------------------------------------------------------------|------|------|------|------|------|-------|
| Bacteria;__Bacteroidetes;__Bacteroidia;__Bacteroidales;__Bacteroidaceae;__Bacteroides                                         | 0.21 | 0.28 | 0.25 | 1.2  | 0.3  | 69.57 |
| Archaea;__Euryarchaeota;__Halobacteria;__Halobacteriales;__Deep_Sea_Hydrothermal_Vent_Gp_6(DHVEG-6);__Candidatus_Parvarchaeum | 0.3  | 0.1  | 0.25 | 1.19 | 0.3  | 69.87 |
| Bacteria;__Proteobacteria;__Gammaproteobacteria;__Alteromonadales;__Pseudoalteromonadaceae;__g                                | 0    | 0.29 | 0.25 | 0.67 | 0.3  | 70.16 |
| Bacteria;__Proteobacteria;__Alphaproteobacteria;__Sphingomonadales;__Sphingomonadaceae;__Sandarakinorhabdus                   | 0.27 | 0    | 0.24 | 1.26 | 0.3  | 70.46 |
| Bacteria;__Proteobacteria;__Betaproteobacteria;__Neisseriales;__Neisseriaceae;__g                                             | 0.27 | 0    | 0.24 | 2.14 | 0.29 | 70.75 |
| Bacteria;__Proteobacteria;__Alphaproteobacteria;__Rhodobacterales;__Rhodobacteraceae;__Rhodobacter                            | 0.32 | 0.17 | 0.24 | 1.35 | 0.29 | 71.04 |
| Eukaryota;__Fungi;__LKM11;__;__                                                                                               | 0.26 | 0    | 0.24 | 2.69 | 0.29 | 71.32 |
| Bacteria;__Bacteroidetes;__Sphingobacteriia;__Sphingobacteriales;__env.OPS_17;__g                                             | 0.25 | 0    | 0.22 | 1.86 | 0.27 | 71.59 |
| Bacteria;__Proteobacteria;__Alphaproteobacteria;__SAR11_clade;__Chesapeake-Delaware_Bay;__g                                   | 0    | 0.23 | 0.22 | 0.77 | 0.27 | 71.86 |
| Eukaryota;__Stramenopiles;__T53A1;__;__                                                                                       | 0.24 | 0    | 0.22 | 1.81 | 0.27 | 72.13 |
| Bacteria;__Proteobacteria;Other;Other;Other;Other                                                                             | 0.24 | 0    | 0.22 | 3.25 | 0.27 | 72.39 |
| Eukaryota;__Cryptophyceae;__Cryptomonadales;__Teleaulax;__;__                                                                 | 0    | 0.23 | 0.21 | 0.67 | 0.25 | 72.65 |
| Eukaryota;__Fungi;Other;Other;Other;Other                                                                                     | 0.23 | 0    | 0.21 | 1.82 | 0.25 | 72.9  |
| Bacteria;__Firmicutes;__Clostridia;__Clostridiales;__Ruminococcaceae;__g                                                      | 0.24 | 0.19 | 0.2  | 1.37 | 0.24 | 73.14 |
| Bacteria;__Proteobacteria;__Betaproteobacteria;__Burkholderiales;__Comamonadaceae;__Comamonas                                 | 0.22 | 0    | 0.2  | 1.1  | 0.24 | 73.38 |
| Bacteria;__Proteobacteria;__Alphaproteobacteria;__Rhodospirillales;__Rhodospirillaceae;__Thalassospira                        | 0    | 0.22 | 0.2  | 3.24 | 0.24 | 73.63 |
| Eukaryota;__Stramenopiles;__Chrysophyceae;Other;Other;Other                                                                   | 0.22 | 0    | 0.2  | 3.37 | 0.24 | 73.86 |
| Bacteria;__Proteobacteria;__Gammaproteobacteria;__Enterobacteriales;__Enterobacteriaceae;Other                                | 0.13 | 0.17 | 0.2  | 1.33 | 0.24 | 74.1  |
| Bacteria;__Bacteroidetes;__Bacteroidia;__Bacteroidales;__Prevotellaceae;__Prevotella                                          | 0.24 | 0.09 | 0.19 | 1.12 | 0.23 | 74.33 |
| Eukaryota;__Chloroplastida;__Chlorophyceae;__Chlamydomonas;__;__                                                              | 0.21 | 0    | 0.19 | 1.03 | 0.23 | 74.56 |
| Bacteria;__Bacteroidetes;__Flavobacteria;__Flavobacteriales;__Flavobacteriaceae;Other                                         | 0.05 | 0.22 | 0.19 | 1.3  | 0.23 | 74.79 |
| Bacteria;__Proteobacteria;__Betaproteobacteria;__Nitrosomonadales;__Nitrosomonadaceae;__Nitrosomonas                          | 0.21 | 0.03 | 0.19 | 0.94 | 0.23 | 75.01 |
| Bacteria;__Firmicutes;__Bacilli;__Bacillales;__Staphylococcaceae;Other                                                        | 0.23 | 0.04 | 0.19 | 1.27 | 0.22 | 75.24 |
| Bacteria;__Actinobacteria;__Actinobacteria;Other;Other;Other                                                                  | 0.19 | 0    | 0.18 | 1.24 | 0.22 | 75.46 |
| Archaea;__Thaumarchaeota;__Marine_Group_I;__o;__f;__g                                                                         | 0    | 0.19 | 0.18 | 1.33 | 0.21 | 75.67 |
| Bacteria;__Proteobacteria;__Betaproteobacteria;__Burkholderiales;__Comamonadaceae;__BAL58_marine_group                        | 0    | 0.18 | 0.17 | 0.87 | 0.21 | 75.88 |
| Bacteria;__Bacteroidetes;Other;Other;Other;Other                                                                              | 0.19 | 0    | 0.17 | 2.25 | 0.21 | 76.08 |
| Bacteria;__Proteobacteria;__Alphaproteobacteria;__Rhodobacterales;__Rhodobacteraceae;__Paracoccus                             | 0.18 | 0.04 | 0.17 | 0.82 | 0.2  | 76.29 |
| Bacteria;__Proteobacteria;__Gammaproteobacteria;__Oceanospirillales;__Oceanospirillaceae;__Pseudospirillum                    | 0.18 | 0    | 0.17 | 1.27 | 0.2  | 76.49 |
| Bacteria;Other;Other;Other;Other;Other                                                                                        | 0.19 | 0    | 0.17 | 1.66 | 0.2  | 76.69 |

|                                                                                                                           |      |      |      |      |      |       |
|---------------------------------------------------------------------------------------------------------------------------|------|------|------|------|------|-------|
| Bacteria;__Bacteroidetes;__Flavobacteria;__Flavobacteriales;__NS9_marine_group;__g                                        | 0.21 | 0.07 | 0.16 | 1.53 | 0.2  | 76.89 |
| Bacteria;__Actinobacteria;__Actinobacteria;__Corynebacteriales;__Mycobacteriaceae;__Mycobacterium                         | 0.18 | 0    | 0.16 | 1.09 | 0.2  | 77.08 |
| Eukaryota;__Alveolata;__Ciliophora;__Conthreep;__Oligohymenophorea;Other                                                  | 0.17 | 0    | 0.16 | 1.31 | 0.19 | 77.28 |
| Bacteria;__Proteobacteria;__Gammaproteobacteria;__Alteromonadales;__Colwelliaceae;__Colwellia                             | 0    | 0.19 | 0.16 | 0.67 | 0.19 | 77.47 |
| Bacteria;__Verrucomicrobia;__Verrucomicrobiae;__Verrucomicrobiales;__Verrucomicrobiaceae;__g                              | 0.17 | 0    | 0.16 | 3.01 | 0.19 | 77.66 |
| Eukaryota;Other;Other;Other;Other;Other                                                                                   | 0    | 0.17 | 0.16 | 1.02 | 0.19 | 77.85 |
| Bacteria;__Bacteroidetes;__Sphingobacteriia;__Sphingobacteriales;Other;Other                                              | 0.17 | 0    | 0.16 | 3.91 | 0.19 | 78.04 |
| Bacteria;__Proteobacteria;__Deltaproteobacteria;__Syntrophobacteriales;__Syntrophaceae;__Smithella                        | 0.16 | 0    | 0.16 | 0.67 | 0.19 | 78.23 |
| Bacteria;__Proteobacteria;__Gammaproteobacteria;__Oceanospirillales;__SAR86_clade;__g                                     | 0.06 | 0.16 | 0.15 | 0.91 | 0.19 | 78.42 |
| Bacteria;__Proteobacteria;__Alphaproteobacteria;__Rhizobiales;__Hyphomicrobiaceae;__Devosia                               | 0.17 | 0    | 0.15 | 1.32 | 0.19 | 78.6  |
| Bacteria;__Bacteroidetes;__WCHB1-32;__o;__f;__g                                                                           | 0.17 | 0    | 0.15 | 1.22 | 0.18 | 78.79 |
| Bacteria;__Proteobacteria;__Betaproteobacteria;__Rhodocyclales;__Rhodocyclaceae;Other                                     | 0.16 | 0    | 0.15 | 3.29 | 0.18 | 78.96 |
| Bacteria;__Proteobacteria;__Alphaproteobacteria;__Rhodobacterales;__Rhodobacteraceae;__Roseobacter_clade_DC5-80-3_lineage | 0.07 | 0.14 | 0.14 | 0.94 | 0.17 | 79.14 |
| Bacteria;__Proteobacteria;__Alphaproteobacteria;__Caulobacterales;__Caulobacteraceae;__Phenylobacterium                   | 0.16 | 0    | 0.14 | 1.33 | 0.17 | 79.31 |
| Bacteria;__Proteobacteria;__Deltaproteobacteria;__Desulfuromonadales;Other;Other                                          | 0.16 | 0    | 0.14 | 1.33 | 0.17 | 79.48 |
| Bacteria;__Acidobacteria;__Holophagae;__Holophagales;__Holophagaceae;__Geothrix                                           | 0.16 | 0    | 0.14 | 2.38 | 0.17 | 79.65 |
| Bacteria;__Proteobacteria;__Alphaproteobacteria;__SAR11_clade;__Surface_1;__g                                             | 0.06 | 0.17 | 0.14 | 1.26 | 0.16 | 79.82 |
| Bacteria;__Proteobacteria;__Betaproteobacteria;__Nitrosomonadales;__Gallionellaceae;__Gallionella                         | 0    | 0.14 | 0.14 | 1.03 | 0.16 | 79.98 |
| Eukaryota;__Stramenopiles;__Pirsonia;__;__;__                                                                             | 0    | 0.16 | 0.14 | 0.67 | 0.16 | 80.14 |

#### Groups Atlas Cove & Brown Lagoon

Average dissimilarity = 83.55

| Species                                                                                               | Atlas Cove | Brown Lagoon | Av.Diss | Diss/SD | Contrib% | Cum.% |
|-------------------------------------------------------------------------------------------------------|------------|--------------|---------|---------|----------|-------|
|                                                                                                       | Av.Abund   | Av.Abund     |         |         |          |       |
| Bacteria;__Cyanobacteria;__Chloroplast;__Chloroplast;__Chloroplast;__Chloroplast                      | 2.38       | 5.14         | 3.87    | 1.53    | 4.63     | 4.63  |
| Bacteria;__Proteobacteria;__Alphaproteobacteria;__Sphingomonadales;__Sphingomonadaceae;__Sphingopyxis | 0.26       | 4.06         | 3.68    | 1.88    | 4.4      | 9.03  |
| Bacteria;__Proteobacteria;__Gammaproteobacteria;__Oceanospirillales;__ZD0405;__g                      | 3.19       | 0.12         | 3.09    | 1.8     | 3.7      | 12.73 |
| Bacteria;__Proteobacteria;__Betaproteobacteria;__Burkholderiales;__Comamonadaceae;Other               | 0.03       | 3.08         | 2.93    | 2.61    | 3.51     | 16.24 |
| Bacteria;__Proteobacteria;__Gammaproteobacteria;Other;Other;Other                                     | 3.15       | 0.13         | 2.88    | 2.66    | 3.45     | 19.69 |
| Bacteria;__Proteobacteria;__Alphaproteobacteria;__SAR11_clade;__Surface_1;__g                         | 2.82       | 0.17         | 2.71    | 1.27    | 3.25     | 22.94 |

|                                                                                                                           |      |      |      |      |      |       |
|---------------------------------------------------------------------------------------------------------------------------|------|------|------|------|------|-------|
| Bacteria;__Bacteroidetes;__Flavobacteria;__Flavobacteriales;__Flavobacteriaceae;__NS3a_marine_group                       | 0.38 | 3.07 | 2.61 | 1.72 | 3.13 | 26.06 |
| Bacteria;__Proteobacteria;__Gammaproteobacteria;__Alteromonadales;__Alteromonadaceae;__SAR92_clade                        | 2.09 | 0.13 | 1.86 | 2.21 | 2.23 | 28.29 |
| Bacteria;__Proteobacteria;__Gammaproteobacteria;__Oceanospirillales;__SAR86_clade;__g                                     | 1.99 | 0.16 | 1.83 | 2.03 | 2.19 | 30.48 |
| Bacteria;__Bacteroidetes;__Flavobacteria;__Flavobacteriales;__Flavobacteriaceae;__NS2b_marine_group                       | 1.92 | 0.1  | 1.77 | 3.25 | 2.12 | 32.61 |
| Bacteria;__Proteobacteria;__Alphaproteobacteria;__Rhodobacterales;__Rhodobacteraceae;Other                                | 0.29 | 2.06 | 1.69 | 1.15 | 2.02 | 34.63 |
| Bacteria;__Proteobacteria;__Alphaproteobacteria;__Rhodobacterales;__Rhodobacteraceae;__Roseobacter_clade_DC5-80-3_lineage | 1.59 | 0.14 | 1.43 | 2.33 | 1.71 | 36.34 |
| Bacteria;__Bacteroidetes;__Flavobacteria;__Flavobacteriales;__NS9_marine_group;__g                                        | 1.54 | 0.07 | 1.39 | 7.28 | 1.67 | 38.01 |
| Archaea;__Euryarchaeota;__Thermoplasmata;__Thermoplasmatales;__Marine_Group_II;__g                                        | 1.28 | 0.06 | 1.23 | 1.77 | 1.48 | 39.48 |
| Bacteria;__Bacteroidetes;__Flavobacteria;__Flavobacteriales;__Flavobacteriaceae;__NS4_marine_group                        | 1.31 | 0.1  | 1.23 | 1.64 | 1.47 | 40.96 |
| Bacteria;__Proteobacteria;__Betaproteobacteria;Other;Other;Other                                                          | 0.45 | 1.33 | 1.04 | 0.76 | 1.25 | 42.2  |
| Eukaryota;__Chloroplastida;__Mamiellophyceae;__Micromonas;__;__                                                           | 0.33 | 1.27 | 1    | 0.9  | 1.2  | 43.41 |
| Bacteria;__Proteobacteria;__Gammaproteobacteria;__Alteromonadales;__Pseudoalteromonadaceae;__Pseudoalteromonas            | 1.18 | 0.03 | 1    | 1.51 | 1.2  | 44.6  |
| Bacteria;__Bacteroidetes;__Flavobacteria;__Flavobacteriales;__Flavobacteriaceae;__Polaribacter                            | 1.7  | 0.68 | 0.97 | 2.72 | 1.16 | 45.76 |
| Bacteria;__Proteobacteria;__Gammaproteobacteria;__Alteromonadales;__Alteromonadaceae;__Alteromonas                        | 1.1  | 0    | 0.96 | 1.33 | 1.14 | 46.9  |
| Bacteria;__Actinobacteria;__Acidimicrobiia;__Acidimicrobiales;__Acidimicrobiaceae;__g                                     | 0.04 | 0.99 | 0.91 | 2.65 | 1.09 | 47.99 |
| Eukaryota;__Stramenopiles;__MAST-1;__MAST-1 B;__;__                                                                       | 1    | 0    | 0.88 | 1.3  | 1.05 | 49.04 |
| Bacteria;__Proteobacteria;__Alphaproteobacteria;__SAR11_clade;Other;Other                                                 | 0.9  | 0.07 | 0.84 | 1.51 | 1    | 50.04 |
| Bacteria;__Bacteroidetes;__Flavobacteria;__Flavobacteriales;__Flavobacteriaceae;Other                                     | 1.01 | 0.22 | 0.8  | 1.27 | 0.96 | 51    |
| Bacteria;__Proteobacteria;__Alphaproteobacteria;__Sphingomonadales;__Erythrobacteraceae;__Altererythrobacter              | 0    | 0.78 | 0.76 | 1.34 | 0.91 | 51.91 |
| Bacteria;__Bacteroidetes;__Flavobacteria;__Flavobacteriales;Other;Other                                                   | 0.84 | 0    | 0.76 | 2.51 | 0.91 | 52.82 |
| Eukaryota;__Haptophyta;__Prymnesiophyceae;Other;Other;Other                                                               | 0.86 | 0.02 | 0.74 | 1.37 | 0.89 | 53.71 |
| Eukaryota;Other;Other;Other;Other;Other                                                                                   | 0.97 | 0.17 | 0.73 | 0.85 | 0.88 | 54.59 |
| Eukaryota;__Metazoa;__Arthropoda;__Maxillopoda;__;__                                                                      | 0.78 | 0.02 | 0.64 | 0.82 | 0.76 | 55.35 |
| Eukaryota;__Alveolata;__Dinoflagellata;__Dinophyceae;__Gymnodiniphyceidae;__Gyrodinium                                    | 0.77 | 0    | 0.63 | 0.75 | 0.76 | 56.11 |
| Eukaryota;__Cryptophyceae;__Cryptomonadales;__Geminigera;__;__                                                            | 0.13 | 0.66 | 0.63 | 0.84 | 0.76 | 56.86 |
| Bacteria;__Proteobacteria;__Alphaproteobacteria;__Rhodobacterales;__Rhodobacteraceae;__Sulfitobacter                      | 0.73 | 0.03 | 0.63 | 1.37 | 0.75 | 57.61 |
| Bacteria;__Proteobacteria;__Gammaproteobacteria;__Oceanospirillales;__Alcanivoracaceae;__Alcanivorax                      | 0.67 | 0    | 0.6  | 2.55 | 0.72 | 58.33 |
| Eukaryota;__Picozoa;__;__;__                                                                                              | 0.68 | 0    | 0.58 | 1.29 | 0.7  | 59.03 |
| Bacteria;__Deferribacteres;__Deferribacteres;__Deferribacterales;__SAR406_clade(Marine_group_A);__g                       | 0.55 | 0    | 0.58 | 1.15 | 0.69 | 59.72 |

|                                                                                                    |      |      |      |      |      |       |
|----------------------------------------------------------------------------------------------------|------|------|------|------|------|-------|
| Bacteria;__Proteobacteria;__Gammaproteobacteria;__Oceanospirillales;__Oceanospirillaceae;Other     | 0.68 | 0.09 | 0.56 | 3.57 | 0.67 | 60.39 |
| Bacteria;__Bacteroidetes;__Flavobacteria;__Flavobacteriales;__Flavobacteriaceae;__NS5_marine_group | 0.6  | 0.07 | 0.56 | 1.09 | 0.67 | 61.06 |
| Eukaryota;__Stramenopiles;__MAST-7;__;__                                                           | 0.62 | 0    | 0.55 | 1.25 | 0.66 | 61.71 |
| Eukaryota;__Stramenopiles;__MAST-3;__;__                                                           | 0.61 | 0    | 0.53 | 1.3  | 0.64 | 62.35 |
| Eukaryota;__Alveolata;__Ciliophora;__Spirotrichea;__Oligotrichia;__uncultured                      | 0.66 | 0.05 | 0.53 | 1.09 | 0.64 | 62.99 |
| Bacteria;__Proteobacteria;__Alphaproteobacteria;__Rickettsiales;__SAR116_clade;__g                 | 0.57 | 0.05 | 0.52 | 2.22 | 0.63 | 63.61 |
| Bacteria;__Proteobacteria;__Gammaproteobacteria;__Oceanospirillales;__OM182_clade;__g              | 0.55 | 0.03 | 0.49 | 2.07 | 0.58 | 64.2  |
| Eukaryota;__Cryptophyceae;__Cryptomonadales;__Rhodomonas;__;__                                     | 0    | 0.5  | 0.49 | 0.7  | 0.58 | 64.78 |
| Bacteria;__Proteobacteria;__Alphaproteobacteria;__Rhodobacterales;__Rhodobacteraceae;__g           | 0.85 | 0.35 | 0.48 | 1.25 | 0.58 | 65.35 |
| Bacteria;__Bacteroidetes;__Cytophagia;__Cytophagales;__Cytophagaceae;__Leadbetterella              | 0    | 0.5  | 0.48 | 1.33 | 0.57 | 65.93 |
| Bacteria;__Proteobacteria;__Alphaproteobacteria;__Rhodobacterales;__Rhodobacteraceae;__Loktanelle  | 0    | 0.49 | 0.47 | 4.72 | 0.57 | 66.49 |
| Bacteria;__Proteobacteria;__Alphaproteobacteria;__SAR11_clade;__Surface_4;__g                      | 0.49 | 0.02 | 0.47 | 1.51 | 0.56 | 67.06 |
| Unassigned;Other;Other;Other;Other;Other                                                           | 1.01 | 0.73 | 0.47 | 1.26 | 0.56 | 67.62 |
| Archaea;__Thaumarchaeota;__Marine_Group_I;__o;__f;__g                                              | 0.65 | 0.19 | 0.47 | 1.05 | 0.56 | 68.19 |
| Bacteria;__Proteobacteria;__Gammaproteobacteria;__Alteromonadales;__Colwelliaceae;__Colwellia      | 0.61 | 0.19 | 0.47 | 1.41 | 0.56 | 68.75 |
| Bacteria;__Proteobacteria;__Gammaproteobacteria;__Pseudomonadales;__Moraxellaceae;__Perlucidibaca  | 0.49 | 0    | 0.42 | 1.38 | 0.51 | 69.26 |
| Eukaryota;__Alveolata;__Protalveolata;__Syndiniales;__Syndiniales Group I;__                       | 0.48 | 0    | 0.42 | 1.31 | 0.5  | 69.76 |
| Bacteria;__Bacteroidetes;__Flavobacteria;__Flavobacteriales;__Cryomorphaeae;__Owenweeksia          | 0.47 | 0.07 | 0.4  | 1.68 | 0.48 | 70.24 |
| Eukaryota;__Holozoa;__Choanomonada;__Acanthoecida;__Diaphanoeca;__                                 | 0.45 | 0    | 0.38 | 0.95 | 0.45 | 70.69 |
| Eukaryota;__Alveolata;__Ciliophora;__Spirotrichea;__Oligotrichia;__Strombidium                     | 0.47 | 0.11 | 0.37 | 0.88 | 0.44 | 71.13 |
| Eukaryota;__Alveolata;__Protalveolata;__Syndiniales;__Syndiniales Group II;__                      | 0.41 | 0    | 0.36 | 1.28 | 0.43 | 71.56 |
| Bacteria;__Proteobacteria;__Alphaproteobacteria;Other;Other;Other                                  | 0.42 | 0.08 | 0.34 | 1.39 | 0.41 | 71.97 |
| Eukaryota;__Stramenopiles;__MAST-1;__MAST-1 A;__;__                                                | 0.4  | 0    | 0.34 | 1.32 | 0.41 | 72.38 |
| Bacteria;__Proteobacteria;__Deltaproteobacteria;__SAR324_clade(Marine_group_B);__f;__g             | 0.35 | 0.02 | 0.34 | 1.19 | 0.41 | 72.79 |
| Bacteria;__Proteobacteria;__Alphaproteobacteria;__SAR11_clade;__f;__g                              | 0.32 | 0    | 0.33 | 1.13 | 0.39 | 73.18 |
| Eukaryota;__Alveolata;__Dinoflagellata;__Dinophyceae;__Gymnodiniphyceidae;Other                    | 0.38 | 0.08 | 0.32 | 0.91 | 0.39 | 73.57 |
| Bacteria;__Proteobacteria;__Gammaproteobacteria;__Alteromonadales;__Alteromonadaceae;Other         | 0.45 | 0.1  | 0.32 | 2.11 | 0.38 | 73.95 |
| Bacteria;__Bacteroidetes;__Cytophagia;__Cytophagales;__Flammeovirgaceae;__Marinoscillum            | 0.33 | 0.04 | 0.32 | 0.82 | 0.38 | 74.33 |
| Eukaryota;__Alveolata;__Ciliophora;__Spirotrichea;__Choreotrichia;__uncultured                     | 0.37 | 0    | 0.31 | 0.86 | 0.37 | 74.7  |
| Eukaryota;__Alveolata;__Dinoflagellata;__Dinophyceae;__Gymnodiniphyceidae;__Gymnodinium            | 0.39 | 0.02 | 0.31 | 0.88 | 0.37 | 75.07 |
| Bacteria;__Bacteroidetes;__Flavobacteria;__Flavobacteriales;__Flavobacteriaceae;__g                | 0.39 | 0.06 | 0.3  | 2.59 | 0.36 | 75.43 |
| Bacteria;__Proteobacteria;__Gammaproteobacteria;__Oceanospirillales;Other;Other                    | 0.3  | 0    | 0.3  | 2.15 | 0.36 | 75.8  |
| Bacteria;__Proteobacteria;__Gammaproteobacteria;__Alteromonadales;__Pseudoalteromonadaceae;__g     | 0.07 | 0.29 | 0.28 | 0.82 | 0.33 | 76.13 |
| Eukaryota;__Rhizaria;__Cercozoa;__Thecofilosea;__Cryomonadida;__Cryothecomonas                     | 0.34 | 0.08 | 0.28 | 1    | 0.33 | 76.46 |
| Bacteria;__Proteobacteria;__Betaproteobacteria;__Burkholderiales;__Comamonadaceae;__Acidovorax     | 0    | 0.29 | 0.28 | 1.83 | 0.33 | 76.8  |

|                                                                                                       |      |      |      |      |      |       |
|-------------------------------------------------------------------------------------------------------|------|------|------|------|------|-------|
| Eukaryota;__Metazoa;__Cnidaria;__Hydrozoa;__;__                                                       | 0.33 | 0.02 | 0.28 | 0.72 | 0.33 | 77.13 |
| Bacteria;__Bacteroidetes;__Cytophagia;__Cytophagales;__Flammeovirgaceae;Other                         | 0.27 | 0    | 0.26 | 1.88 | 0.31 | 77.44 |
| Eukaryota;__Stramenopiles;__MAST-8;__;__                                                              | 0.29 | 0    | 0.26 | 1.22 | 0.31 | 77.75 |
| Bacteria;__Bacteroidetes;__Bacteroidia;__Bacteroidales;__Bacteroidaceae;__Bacteroides                 | 0.04 | 0.28 | 0.25 | 1.14 | 0.3  | 78.05 |
| Bacteria;__Proteobacteria;Other;Other;Other;Other                                                     | 0.25 | 0    | 0.24 | 2.64 | 0.29 | 78.35 |
| Bacteria;__Proteobacteria;__Gammaproteobacteria;__Oceanospirillales;__Oceanospirillaceae;__Balneatrix | 0.25 | 0    | 0.24 | 1.63 | 0.29 | 78.63 |
| Bacteria;__Proteobacteria;__Alphaproteobacteria;__SAR11_clade;__Chesapeake-Delaware_Bay;__g           | 0.08 | 0.23 | 0.24 | 0.99 | 0.29 | 78.92 |
| Eukaryota;__Haptophyta;__Prymnesiophyceae;__Prymnesiales;Other;Other                                  | 0.27 | 0    | 0.24 | 1.33 | 0.28 | 79.21 |
| Eukaryota;__Cryptophyceae;__Cryptomonadales;__Teleaulax;__;__                                         | 0.07 | 0.23 | 0.24 | 0.8  | 0.28 | 79.49 |
| Bacteria;Other;Other;Other;Other;Other                                                                | 0.25 | 0    | 0.23 | 4.29 | 0.27 | 79.76 |
| Eukaryota;__Metazoa;__Annelida;__;__;__                                                               | 0.27 | 0    | 0.22 | 1.01 | 0.27 | 80.03 |

#### Groups Winston Lagoon & Brown Lagoon

Average dissimilarity = 66.06

| Species                                                                                                                       | Winston Lagoon<br>Av.Abund | Brown Lagoon<br>Av.Abund | Av.Diss | Diss/SD | Contrib% | Cum.% |
|-------------------------------------------------------------------------------------------------------------------------------|----------------------------|--------------------------|---------|---------|----------|-------|
| Bacteria;__Cyanobacteria;__Chloroplast;__Chloroplast;__Chloroplast;__Chloroplast                                              | 3.37                       | 5.14                     | 3.66    | 1.42    | 5.53     | 5.53  |
| Bacteria;__Proteobacteria;__Alphaproteobacteria;__Sphingomonadales;__Sphingomonadaceae;__Sphingopyxis                         | 1.75                       | 4.06                     | 3.02    | 1.7     | 4.57     | 10.11 |
| Bacteria;__Proteobacteria;__Betaproteobacteria;__Burkholderiales;__Comamonadaceae;Other                                       | 1.03                       | 3.08                     | 2.22    | 1.61    | 3.36     | 13.47 |
| Bacteria;__Bacteroidetes;__Flavobacteria;__Flavobacteriales;__Flavobacteriaceae;__NS3a_marine_group                           | 0.9                        | 3.07                     | 2.18    | 1.27    | 3.3      | 16.77 |
| Bacteria;__Proteobacteria;__Alphaproteobacteria;__SAR11_clade;__Surface_1;__g                                                 | 2.12                       | 0.17                     | 2.05    | 0.73    | 3.1      | 19.88 |
| Bacteria;__Bacteroidetes;__Flavobacteria;__Flavobacteriales;__Flavobacteriaceae;Other                                         | 2.34                       | 0.22                     | 1.87    | 0.88    | 2.83     | 22.71 |
| Bacteria;__Proteobacteria;__Alphaproteobacteria;__Rhodobacterales;__Rhodobacteraceae;Other                                    | 1.87                       | 2.06                     | 1.53    | 1.46    | 2.32     | 25.03 |
| Archaea;__Thaumarchaeota;__Marine_Group_I;__o;__f;__g                                                                         | 1.55                       | 0.19                     | 1.41    | 0.82    | 2.13     | 27.16 |
| Bacteria;__Proteobacteria;__Gammaproteobacteria;__Oceanospirillales;__SAR86_clade;__g                                         | 1.39                       | 0.16                     | 1.32    | 0.93    | 1.99     | 29.15 |
| Bacteria;__Proteobacteria;__Gammaproteobacteria;__Oceanospirillales;__ZD0405;__g                                              | 1.34                       | 0.12                     | 1.28    | 0.94    | 1.94     | 31.09 |
| Bacteria;__Proteobacteria;__Betaproteobacteria;Other;Other;Other                                                              | 0.68                       | 1.33                     | 1.23    | 1.01    | 1.86     | 32.95 |
| Eukaryota;__Chloroplastida;__Mamiellophyceae;__Micromonas;__;__                                                               | 0.8                        | 1.27                     | 1.16    | 1.18    | 1.75     | 34.7  |
| Archaea;__Euryarchaeota;__Halobacteria;__Halobacteriales;__Deep_Sea_Hydrothermal_Vent_Gp_6(DHVEG-6);__Candidatus_Parvarchaeum | 1.11                       | 0.1                      | 1.04    | 0.77    | 1.58     | 36.27 |
| Bacteria;__Proteobacteria;__Gammaproteobacteria;__Alteromonadales;__Pseudoalteromonadaceae;__g                                | 1.15                       | 0.29                     | 0.95    | 1.53    | 1.44     | 37.71 |



|                                                                                                                           |      |      |      |      |      |       |
|---------------------------------------------------------------------------------------------------------------------------|------|------|------|------|------|-------|
| Bacteria;__Actinobacteria;__Actinobacteria;__Corynebacteriales;__Nocardiaceae;__Rhodococcus                               | 0.96 | 0.13 | 0.82 | 1.09 | 1.24 | 38.96 |
| Bacteria;__Proteobacteria;__Gammaproteobacteria;__Alteromonadales;__Colwelliaceae;__Colwellia                             | 0.95 | 0.19 | 0.8  | 1.59 | 1.21 | 40.16 |
| Bacteria;__Actinobacteria;__Acidimicrobiia;__Acidimicrobiales;__Acidimicrobiaceae;__g                                     | 0.54 | 0.99 | 0.78 | 2.19 | 1.18 | 41.35 |
| Unassigned;Other;Other;Other;Other;Other                                                                                  | 1.43 | 0.73 | 0.71 | 1.44 | 1.07 | 42.42 |
| Archaea;__Euryarchaeota;__Halobacteria;__Halobacteriales;__Deep_Sea_Hydrothermal_Vent_Gp_6(DHVEG-6);__g                   | 0.68 | 0.09 | 0.67 | 0.8  | 1.01 | 43.43 |
| Bacteria;__Proteobacteria;__Alphaproteobacteria;__Sphingomonadales;__Erythrobacteraceae;__Altererythrobacter              | 0.2  | 0.78 | 0.66 | 1.22 | 1    | 44.42 |
| Eukaryota;__Cryptophyceae;__Cryptomonadales;__Geminigera;__;                                                              | 0.05 | 0.66 | 0.63 | 0.77 | 0.95 | 45.38 |
| Eukaryota;__Alveolata;__Ciliophora;__Conthreep;__Phyllopharyngea;__AT1-2                                                  | 0.75 | 0.05 | 0.62 | 0.85 | 0.94 | 46.32 |
| Bacteria;__Proteobacteria;__Alphaproteobacteria;__Rhodobacterales;__Rhodobacteraceae;__g                                  | 0.89 | 0.35 | 0.62 | 1.33 | 0.94 | 47.26 |
| Bacteria;__Proteobacteria;__Alphaproteobacteria;__SAR11_clade;Other;Other                                                 | 0.61 | 0.07 | 0.61 | 0.78 | 0.92 | 48.19 |
| Bacteria;__Bacteroidetes;__Flavobacteria;__Flavobacteriales;__Flavobacteriaceae;__g                                       | 0.68 | 0.06 | 0.59 | 0.92 | 0.9  | 49.08 |
| Bacteria;__Candidate_division_OD1;__c;__o;__f;__g                                                                         | 0.56 | 0.02 | 0.57 | 0.82 | 0.87 | 49.95 |
| Bacteria;__Bacteroidetes;__Flavobacteria;__Flavobacteriales;__Flavobacteriaceae;__Polaribacter                            | 0.91 | 0.68 | 0.57 | 1.32 | 0.86 | 50.81 |
| Bacteria;__Proteobacteria;__Deltaproteobacteria;__Bdellovibrionales;__Bacteriovoracaceae;__Peredibacter                   | 0.59 | 0.08 | 0.52 | 1.36 | 0.78 | 51.59 |
| Eukaryota;__Alveolata;__Ciliophora;__Conthreep;__Phyllopharyngea;__Dysteria                                               | 0.59 | 0.03 | 0.51 | 0.79 | 0.77 | 52.36 |
| Eukaryota;__Cryptophyceae;__Cryptomonadales;__Rhodomonas;__;                                                              | 0.04 | 0.5  | 0.51 | 0.72 | 0.77 | 53.13 |
| Bacteria;__Proteobacteria;__Alphaproteobacteria;__Rhodobacterales;__Rhodobacteraceae;__Roseobacter_clade_DC5-80-3_lineage | 0.55 | 0.14 | 0.45 | 1.6  | 0.68 | 53.8  |
| Bacteria;__Bacteroidetes;__Cytophagia;__Cytophagales;__Cytophagaceae;__Leadbetterella                                     | 0.18 | 0.5  | 0.43 | 1.39 | 0.66 | 54.46 |
| Bacteria;__Bacteroidetes;__Sphingobacteriia;__Sphingobacteriales;__Saprospiraceae;__Lewinella                             | 0.48 | 0.02 | 0.42 | 1.04 | 0.63 | 55.09 |
| Bacteria;__Proteobacteria;__Alphaproteobacteria;__SAR11_clade;__Surface_4;__g                                             | 0.36 | 0.02 | 0.38 | 0.7  | 0.58 | 55.66 |
| Bacteria;__Proteobacteria;__Gammaproteobacteria;__Enterobacteriales;__Enterobacteriaceae;Other                            | 0.37 | 0.17 | 0.33 | 1.58 | 0.51 | 56.17 |
| Bacteria;__Bacteroidetes;__Flavobacteria;__Flavobacteriales;__Flavobacteriaceae;__NS2b_marine_group                       | 0.42 | 0.1  | 0.33 | 2.04 | 0.5  | 56.67 |
| Bacteria;__Bacteroidetes;__Flavobacteria;__Flavobacteriales;__NS9_marine_group;__g                                        | 0.4  | 0.07 | 0.32 | 1.37 | 0.49 | 57.16 |
| Bacteria;__Bacteroidetes;__Flavobacteria;__Flavobacteriales;__Cryomorpaceae;__Owenweeksia                                 | 0.39 | 0.07 | 0.32 | 1.87 | 0.49 | 57.65 |
| Archaea;__Euryarchaeota;__Thermoplasmata;__Thermoplasmatales;__Marine_Group_II;__g                                        | 0.37 | 0.06 | 0.32 | 1.89 | 0.48 | 58.13 |
| Bacteria;__Proteobacteria;__Gammaproteobacteria;__Alteromonadales;__Alteromonadaceae;__Glaciecola                         | 0.36 | 0.03 | 0.32 | 1.06 | 0.48 | 58.61 |
| Bacteria;__Bacteroidetes;__Sphingobacteriia;__Sphingobacteriales;__Saprospiraceae;__g                                     | 0.34 | 0.04 | 0.3  | 0.76 | 0.46 | 59.07 |
| Bacteria;__Bacteroidetes;__Sphingobacteriia;__Sphingobacteriales;__Saprospiraceae;__Aureispira                            | 0.32 | 0    | 0.28 | 0.83 | 0.43 | 59.5  |
| Bacteria;__Bacteroidetes;__Flavobacteria;__Flavobacteriales;__Flavobacteriaceae;__NS4_marine_group                        | 0.36 | 0.1  | 0.28 | 1.56 | 0.43 | 59.92 |
| Bacteria;__Proteobacteria;__Gammaproteobacteria;Other;Other;Other                                                         | 0.38 | 0.13 | 0.28 | 1.54 | 0.42 | 60.35 |
| Bacteria;__Bacteroidetes;__Flavobacteria;__Flavobacteriales;__Flavobacteriaceae;__NS5_marine_group                        | 0.32 | 0.07 | 0.28 | 1.12 | 0.42 | 60.77 |

|                                                                                                         |      |      |      |      |      |       |
|---------------------------------------------------------------------------------------------------------|------|------|------|------|------|-------|
| Bacteria;__Bacteroidetes;__Sphingobacteriia;__Sphingobacteriales;__NS11-12_marine_group;__g             | 0.35 | 0.17 | 0.27 | 1.13 | 0.41 | 61.18 |
| Bacteria;__Proteobacteria;__Gammaproteobacteria;__Oceanospirillales;__Oceanospirillaceae;Other          | 0.36 | 0.09 | 0.27 | 1.79 | 0.41 | 61.59 |
| Bacteria;__Bacteroidetes;__Bacteroidia;__Bacteroidales;__Bacteroidaceae;__Bacteroides                   | 0.3  | 0.28 | 0.26 | 1.21 | 0.39 | 61.98 |
| Eukaryota;__Alveolata;__Ciliophora;__Spirotrichea;__Hypotrichia;__                                      | 0.31 | 0.03 | 0.25 | 1.37 | 0.39 | 62.37 |
| Bacteria;__Proteobacteria;__Alphaproteobacteria;__SAR11_clade;__Chesapeake-Delaware_Bay;__g             | 0.13 | 0.23 | 0.25 | 1.12 | 0.38 | 62.75 |
| Eukaryota;__Alveolata;__Ciliophora;__Spirotrichea;__Hypotrichia;Other                                   | 0.3  | 0.04 | 0.25 | 1.72 | 0.38 | 63.13 |
| Bacteria;__Fusobacteria;__Fusobacteria;__Fusobacteriales;__Fusobacteriaceae;__Fusobacterium             | 0.36 | 0.22 | 0.25 | 1.49 | 0.38 | 63.51 |
| Bacteria;__Proteobacteria;__Alphaproteobacteria;__SAR11_clade;__f;__g                                   | 0.24 | 0    | 0.25 | 0.86 | 0.37 | 63.89 |
| Bacteria;__Proteobacteria;__Gammaproteobacteria;__Alteromonadales;__Alteromonadaceae;__SAR92_clade      | 0.35 | 0.13 | 0.24 | 1.42 | 0.37 | 64.25 |
| Bacteria;__Proteobacteria;__Betaproteobacteria;__Burkholderiales;__Comamonadaceae;__Acidovorax          | 0.14 | 0.29 | 0.24 | 1.7  | 0.37 | 64.62 |
| Eukaryota;__Chloroplastida;__Ulvophyceae;Other;Other;Other                                              | 0.31 | 0.13 | 0.24 | 1.13 | 0.36 | 64.98 |
| Bacteria;__Proteobacteria;__Gammaproteobacteria;__Thiotrichales;__Thiotrichaceae;__Thiothrix            | 0.23 | 0    | 0.23 | 0.67 | 0.35 | 65.34 |
| Bacteria;__Proteobacteria;__Alphaproteobacteria;__Rickettsiales;__SAR116_clade;__g                      | 0.24 | 0.05 | 0.23 | 1.27 | 0.35 | 65.69 |
| Bacteria;__Bacteroidetes;__Flavobacteria;__Flavobacteriales;__Flavobacteriaceae;__Pibocella             | 0.26 | 0.02 | 0.23 | 0.99 | 0.35 | 66.04 |
| Bacteria;__Candidate_division_OP3;__c;__o;__f;__g                                                       | 0.23 | 0    | 0.23 | 0.94 | 0.35 | 66.39 |
| Eukaryota;__Alveolata;__Protalveolata;__Perkinsidae;__NA2-2D10;__                                       | 0.23 | 0.15 | 0.23 | 1.15 | 0.35 | 66.73 |
| Eukaryota;__Cryptophyceae;__Cryptomonadales;__Teleaulax;__;                                             | 0    | 0.23 | 0.23 | 0.66 | 0.35 | 67.08 |
| Bacteria;__Firmicutes;__Clostridia;__Clostridiales;__Ruminococcaceae;__g                                | 0.21 | 0.19 | 0.22 | 1.06 | 0.34 | 67.42 |
| Bacteria;__Proteobacteria;__Gammaproteobacteria;__Alteromonadales;__Moritellaceae;__Moritella           | 0.26 | 0.05 | 0.22 | 1.19 | 0.34 | 67.76 |
| Bacteria;__Proteobacteria;__Gammaproteobacteria;__Alteromonadales;__Shewanellaceae;__Shewanella         | 0.28 | 0.07 | 0.22 | 1.78 | 0.34 | 68.09 |
| Bacteria;__Proteobacteria;__Alphaproteobacteria;__Rhodospirillales;__Rhodospirillaceae;__Defluviicoccus | 0.2  | 0.03 | 0.22 | 0.76 | 0.33 | 68.43 |
| Eukaryota;__Alveolata;__Ciliophora;__Spirotrichea;__Euplotia;__Aspidisca                                | 0.26 | 0.02 | 0.22 | 1.61 | 0.33 | 68.76 |
| Eukaryota;__Metazoa;__Arthropoda;__Maxillopoda;__;                                                      | 0.25 | 0.02 | 0.21 | 1.86 | 0.32 | 69.08 |
| Bacteria;__Proteobacteria;__Gammaproteobacteria;__BD7-8_marine_group;__f;__g                            | 0.29 | 0.29 | 0.21 | 1.6  | 0.32 | 69.4  |
| Bacteria;__Candidate_division_OP11;__c;__o;__f;__g                                                      | 0.19 | 0.04 | 0.21 | 0.82 | 0.32 | 69.72 |
| Bacteria;__Proteobacteria;__Gammaproteobacteria;__Chromatiales;__Granulosicoccaceae;__Granulosicoccus   | 0.24 | 0.06 | 0.21 | 1.41 | 0.32 | 70.03 |
| Bacteria;__Proteobacteria;__Gammaproteobacteria;__Oceanospirillales;__Oceanospirillaceae;__Neptunomonas | 0.23 | 0.06 | 0.21 | 1.03 | 0.32 | 70.35 |
| Eukaryota;__Alveolata;__Ciliophora;__Spirotrichea;__Oligotrichia;__uncultured                           | 0.26 | 0.05 | 0.21 | 1.9  | 0.31 | 70.66 |
| Bacteria;__Proteobacteria;__Gammaproteobacteria;__Alteromonadales;Other;Other                           | 0.24 | 0.06 | 0.2  | 1.45 | 0.31 | 70.97 |
| Bacteria;__Proteobacteria;__Alphaproteobacteria;__Rhodobacterales;__Rhodobacteraceae;__Loktanelle       | 0.36 | 0.49 | 0.2  | 0.83 | 0.31 | 71.28 |
| Bacteria;__Proteobacteria;__Alphaproteobacteria;__Rhodobacterales;__Rhodobacteraceae;__Sulfitobacter    | 0.22 | 0.03 | 0.2  | 0.78 | 0.31 | 71.58 |

|                                                                                                             |      |      |      |      |      |       |
|-------------------------------------------------------------------------------------------------------------|------|------|------|------|------|-------|
| Bacteria;__Bacteroidetes;__Flavobacteria;__Flavobacteriales;__Cryomorphaceae;__Fluviicola                   | 0.31 | 0.14 | 0.2  | 1.15 | 0.3  | 71.88 |
| Bacteria;__Proteobacteria;__Alphaproteobacteria;Other;Other;Other                                           | 0.21 | 0.08 | 0.2  | 0.97 | 0.3  | 72.19 |
| Bacteria;__Candidate_division_TM7;__c;__o;__f;__g                                                           | 0.19 | 0    | 0.2  | 0.67 | 0.3  | 72.49 |
| Bacteria;__Proteobacteria;__Gammaproteobacteria;__Thiotrichales;__Thiotrichaceae;__Leucothrix               | 0.23 | 0.03 | 0.2  | 0.91 | 0.3  | 72.79 |
| Bacteria;__Bacteroidetes;__Cytophagia;__Cytophagales;__Flammeovirgaceae;__Reichenbachiella                  | 0.29 | 0.1  | 0.19 | 1.34 | 0.29 | 73.07 |
| Eukaryota;__Stramenopiles;__Pirsonia;__;__;__                                                               | 0.12 | 0.16 | 0.19 | 1.33 | 0.29 | 73.36 |
| Eukaryota;__Rhizaria;__Cercozoa;Other;Other;Other                                                           | 0.21 | 0    | 0.19 | 1.08 | 0.29 | 73.65 |
| Bacteria;__Proteobacteria;__Betaproteobacteria;__Burkholderiales;__Comamonadaceae;__BAL58_marine_group      | 0    | 0.18 | 0.19 | 0.86 | 0.29 | 73.93 |
| Bacteria;__Bacteroidetes;__Bacteroidia;__Bacteroidales;__Marinilabiaceae;__Marinifilum                      | 0.22 | 0.02 | 0.19 | 0.94 | 0.28 | 74.22 |
| Eukaryota;__Alveolata;__Ciliophora;__Spirotrichea;__Oligotrichia;__Strombidium                              | 0.27 | 0.11 | 0.18 | 1.7  | 0.28 | 74.49 |
| Bacteria;__Proteobacteria;__Gammaproteobacteria;__Order_Incertae_Sedis;__Family_Incertae_Sedis;__Arenicella | 0.21 | 0.05 | 0.18 | 1.19 | 0.28 | 74.77 |
| Bacteria;__Proteobacteria;__Alphaproteobacteria;__Kordiimonadales;__Kordiimonadaceae;__Kordiimonas          | 0.28 | 0.15 | 0.18 | 1.25 | 0.27 | 75.04 |
| Eukaryota;Other;Other;Other;Other;Other                                                                     | 0.11 | 0.17 | 0.18 | 1.09 | 0.27 | 75.31 |
| Bacteria;__Planctomycetes;__BD7-11;__o;__f;__g                                                              | 0.21 | 0.05 | 0.18 | 1.47 | 0.27 | 75.58 |
| Eukaryota;__Rhizaria;__Cercozoa;__Thecofilosea;Other;Other                                                  | 0.2  | 0    | 0.17 | 0.67 | 0.26 | 75.84 |
| Eukaryota;__Stramenopiles;__Diatomea;__Coscinodiscophytina;__Fragilariales;__                               | 0.19 | 0    | 0.17 | 0.96 | 0.26 | 76.1  |
| Bacteria;__Actinobacteria;__Acidimicrobiia;__Acidimicrobiales;__OCS155_marine_group;__g                     | 0.16 | 0    | 0.17 | 0.67 | 0.25 | 76.36 |
| Bacteria;__Proteobacteria;__Gammaproteobacteria;__Oceanospirillales;__Oceanospirillaceae;__Marinomonas      | 0.17 | 0.03 | 0.16 | 1.1  | 0.25 | 76.61 |
| Eukaryota;__Alveolata;__Ciliophora;__Conthreep;__Phyllopharyngea;__Hartmannula                              | 0.18 | 0    | 0.16 | 0.67 | 0.24 | 76.85 |
| Bacteria;__Proteobacteria;__Betaproteobacteria;__Burkholderiales;Other;Other                                | 0    | 0.16 | 0.16 | 3.42 | 0.24 | 77.08 |
| Bacteria;__Lentisphaerae;__Lentisphaeria;__Lentisphaerales;__Lentisphaeraceae;__Lentisphaera                | 0.18 | 0.02 | 0.16 | 1    | 0.24 | 77.32 |
| Bacteria;__Proteobacteria;__Gammaproteobacteria;__Legionellales;__Coxiellaceae;__Coxiella                   | 0.16 | 0    | 0.16 | 0.96 | 0.24 | 77.56 |
| Bacteria;__Proteobacteria;__Deltaproteobacteria;__Desulfobacterales;__Nitrospinaceae;__Nitrospina           | 0.16 | 0.02 | 0.16 | 1.19 | 0.24 | 77.79 |
| Bacteria;__Bacteroidetes;__Flavobacteria;__Flavobacteriales;__Flavobacteriaceae;__Flavobacterium            | 0    | 0.15 | 0.15 | 0.66 | 0.23 | 78.03 |
| Bacteria;__Proteobacteria;__Deltaproteobacteria;__Sh765B-TzT-29;__f;__g                                     | 0.15 | 0    | 0.15 | 0.67 | 0.23 | 78.26 |
| Bacteria;__Proteobacteria;__Gammaproteobacteria;__Pseudomonadales;__Moraxellaceae;__Psychrobacter           | 0.16 | 0.1  | 0.15 | 1.24 | 0.23 | 78.49 |
| Bacteria;__Proteobacteria;__Gammaproteobacteria;__Alteromonadales;__Alteromonadaceae;Other                  | 0.25 | 0.1  | 0.15 | 1.53 | 0.23 | 78.72 |
| Bacteria;__Firmicutes;__Clostridia;__Clostridiales;__Ruminococcaceae;__Faecalibacterium                     | 0.16 | 0.04 | 0.15 | 0.87 | 0.23 | 78.95 |
| Bacteria;__Proteobacteria;__Betaproteobacteria;__Nitrosomonadales;__Gallionellaceae;__Gallionella           | 0    | 0.14 | 0.15 | 1.01 | 0.22 | 79.17 |
| Bacteria;__Bacteroidetes;__Flavobacteria;__Flavobacteriales;__Flavobacteriaceae;__Lutibacter                | 0.15 | 0.05 | 0.15 | 0.88 | 0.22 | 79.4  |
| Bacteria;__Proteobacteria;__Deltaproteobacteria;__Bdellovibrionales;__Bacteriovoraceae;__g                  | 0.13 | 0.04 | 0.15 | 0.88 | 0.22 | 79.62 |

|                                                                                         |      |      |      |      |      |       |
|-----------------------------------------------------------------------------------------|------|------|------|------|------|-------|
| Bacteria;__Bacteroidetes;__Bacteroidia;__Bacteroidales;__Prevotellaceae;__Prevotella    | 0.21 | 0.09 | 0.15 | 1.38 | 0.22 | 79.84 |
| Bacteria;__Bacteroidetes;__Cytophagia;__Cytophagales;__Flammeovirgaceae;__Marinoscillum | 0.16 | 0.04 | 0.14 | 1.41 | 0.22 | 80.06 |
